# Supplementary material for: Alternaric acid: formal synthesis and related studies
Source: publisher site journal article supplement (doi:10.3762/bjoc.9.19), 2013-01-24
Supplement: Additional file 1 [file 1860-5397-9-19-S1.pdf]

# **Supporting Information**

for

## **Alternaric acid: formal synthesis and related studies**

Michael C. Slade and Jeffrey S. Johnson\*

Address: Caudill Laboratories, Department of Chemistry, University of North Carolina at Chapel Hill, Chapel Hill, NC 27599-3290, USA

Email: Jeffrey S. Johnson - [jsj@unc.edu](mailto:jsj@unc.edu)

\*Corresponding author

### **Additional data**

### **CONTENTS**

|                                                                                     |             |
|-------------------------------------------------------------------------------------|-------------|
| <b>General methods and materials</b>                                                | <b>S-2</b>  |
| <b>Brief optimization tables for vinyl-/allyl-nucleophile 3-component couplings</b> | <b>S-2</b>  |
| <b>Discussion of the stereochemical issue</b>                                       | <b>S-4</b>  |
| <b>Synthesis of dithiane aldehyde 16ba</b>                                          | <b>S-6</b>  |
| <b>Alternative methods for nucleophile generation/3-C-C</b>                         | <b>S-6</b>  |
| <b>Discussion of desulfurization issues</b>                                         | <b>S-7</b>  |
| <b>Experimental</b>                                                                 | <b>S-8</b>  |
| <b>References</b>                                                                   | <b>S-24</b> |
| <b>Spectra</b>                                                                      | <b>S-25</b> |

**Materials and Methods: General.** Infrared (IR) spectra were obtained using a Jasco 260 Plus Fourier transform infrared spectrometer. Proton and carbon nuclear magnetic resonance spectra ( $^1\text{H}$  NMR and  $^{13}\text{C}$  NMR) were recorded on a Bruker 300, Avance 400, DRX 400, or 600 MHz ( $^1\text{H}$  NMR at 300, 400, or 600 MHz and  $^{13}\text{C}$  NMR at 100 or 150 MHz) spectrometer with solvent resonance as the internal standard ( $^1\text{H}$  NMR:  $\text{CDCl}_3$  at 7.26 ppm,  $^{13}\text{C}$  NMR:  $\text{CDCl}_3$  at 77.0 ppm).  $^1\text{H}$  NMR data are reported as follows: chemical shift, multiplicity (app = apparent, s = singlet, br s = broad singlet, d = doublet, dd = doublet of doublets, dt = doublet of triplets, t = triplet, q = quartet, m = multiplet), coupling constants (Hz), and integration. Mass spectra were obtained using a Micromass Quattro II (triple quad) instrument with nanoelectrospray ionization. Analytical thin layer chromatography (TLC) was performed on Sorbent Technologies Silica G 0.20 mm silica gel plates. Visualization was accomplished with UV light, aqueous basic potassium permanganate solution ( $\text{KMnO}_4$ ), or aqueous ceric ammonium molybdate solution (CAM) followed by heating. Flash column chromatography was performed using Silia-P flash silica gel (40–63  $\mu\text{m}$ ) purchased from Silicycle. Ozonolyses were performed with  $\text{O}_3$  produced by a Yanco Industries Ozone Services model OL80B ozonator. Yield refers to isolated yield of analytically pure material unless otherwise noted. The diastereomer ratios reported are for crude reaction mixtures. Reactions were performed in oven- or flame-dried glassware equipped with Teflon coated stir bars in solvents that had been dried by passage through a column of neutral alumina under nitrogen prior to use, unless otherwise stated. When reagents that were purchased commercially were employed, a reference for the compound has been provided in the procedure. All other reagents were obtained from commercial sources and used as received, unless otherwise noted.

### Brief optimization tables for three-component couplings

The following results were obtained in initial explorations of the various three-component coupling reactions discussed in the manuscript.

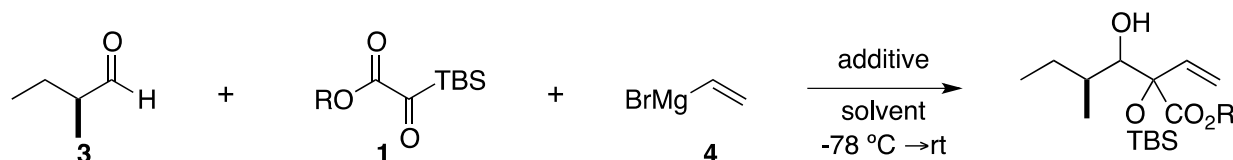

**Table 1:** Optimization of the vinyl nucleophile three-component coupling.

| Entry | Silyl Glyoxylate             | Solvent | Additive      | Yield (%) <sup>a</sup> | dr                 |
|-------|------------------------------|---------|---------------|------------------------|--------------------|
| 1     | <b>1a</b> ; R = <i>t</i> -Bu | THF     | (–)-sparteine | 40                     | 1.4:1              |
| 2     | <b>1a</b>                    | Toluene | (–)-sparteine | 65                     | 1.7:1              |
| 3     | <b>1a</b>                    | THF     | ---           | 42                     | 1.3:1 <sup>b</sup> |
| 4     | <b>1a</b>                    | Toluene | ---           | <40                    | 1.4:1 <sup>b</sup> |
| 5     | <b>1b</b> ; R = Bn           | Toluene | (–)-sparteine | 39                     | 1.6:1              |

<sup>a</sup>Isolated yield after chromatography. <sup>b</sup>The 3<sup>rd</sup> and 4<sup>th</sup> diastereomers formed appreciably.

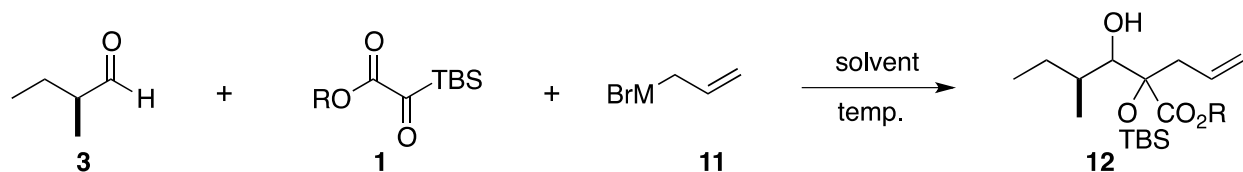

**Table S-2:** Optimization of the allyl nucleophile in three-component coupling.

| Entry | Silyl Glyoxylate          | Nucleophile          | Solvent, Temp.   | Result                                                                            |
|-------|---------------------------|----------------------|------------------|-----------------------------------------------------------------------------------|
| 1     | <b>1a</b> ( <i>t</i> -Bu) | <b>11-S</b> (M = Mg) | THF, -78 °C      | “Complex mixture” <sup>a</sup>                                                    |
| 2     | <b>1b</b> (Bn)            | <b>11-S</b>          | THF, -78 °C      | “Complex mixture”                                                                 |
| 3     | <b>1a</b>                 | <b>11-S</b>          | THF, -100 °C     | “Complex mixture” <sup>a</sup>                                                    |
| 4     | <b>1b</b>                 | <b>11-S</b>          | THF, -100 °C     | 20% <sup>b</sup> of major diast. of <b>12</b>                                     |
| 5     | <b>1b</b>                 | <b>11</b> (M = Zn)   | THF, -78 °C → rt | 45% total <b>12</b> , <sup>b</sup> 3.6:1 <i>syn</i> -/ <i>anti</i> - <sup>c</sup> |
| 6     | <b>1b</b>                 | <b>11</b>            | THF, 0 °C → rt   | 50% total <b>12</b> , <sup>b</sup> 3.6:1 <i>syn</i> -/ <i>anti</i> - <sup>c</sup> |

<sup>a</sup>Initially dismissed as such; reexamination of spectral data revealed that the isolated material was a relatively pure mixture of *all four* possible diastereomers. More of the peaks in the <sup>1</sup>H NMR of compound **12-S** (R = *t*-Bu) are resolved, as compared to product **12** (R = Bn). More of the resonances in compound **12** are coincident, which led to an initial overestimation of the chemical and stereochemical purity of this material. <sup>b</sup>Isolated yield. <sup>c</sup>Determined after isolation of the diastereomers and mixed fractions by chromatography. Only the *syn*-/*anti*-diastereomers were separable: within these, the Felkin/*anti*-Felkin diastereomers (~1.7:1) were inseparable.

## Discussion of the stereochemical issue

The following schemes summarize the alternative approaches considered, some of which were explored to address the stereochemical issues inherent in using (*S*)-2-methylbutanal (**3**) as the terminal electrophile in three-component couplings. **Scheme S-1** provides a general overview:

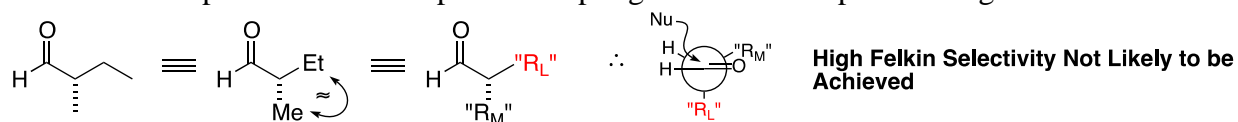

### Potential Solutions:

#### I. Obviate Facial Selectivity:

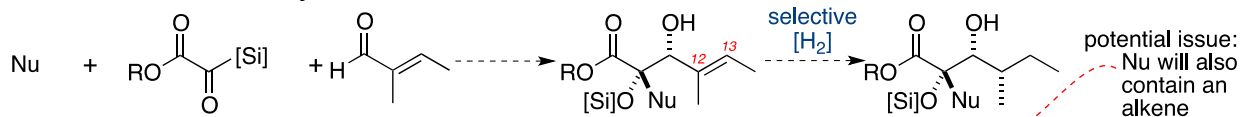

#### II. Auxiliary Control:

##### a) modify silyl glyoxylate

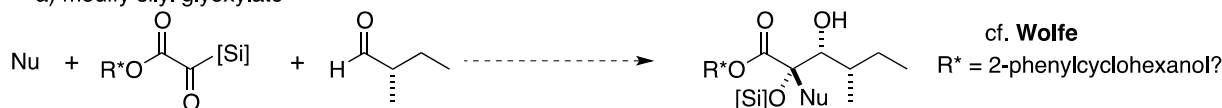

##### b) modify aldehyde

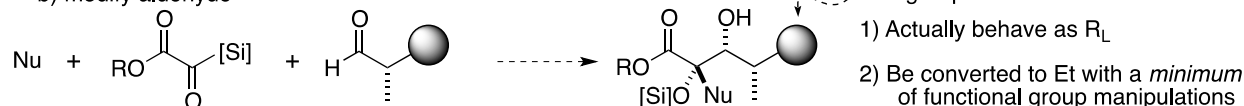

**Scheme S-1:** Approaches considered to address the stereochemical issue. The Wolfe citation is [1].

Approach **S-1 I** was not pursued because of the issue highlighted in **Scheme S-1**: potential chemoselectivity issues due to the unsaturation present in the nucleophilic fragment. Approach **S-1 IIa**) was investigated as summarized in **Scheme S-2** below. The approach in **Scheme S-1 IIb**) was also explored, as summarized in **Scheme S-3** to **Scheme S-7** below.

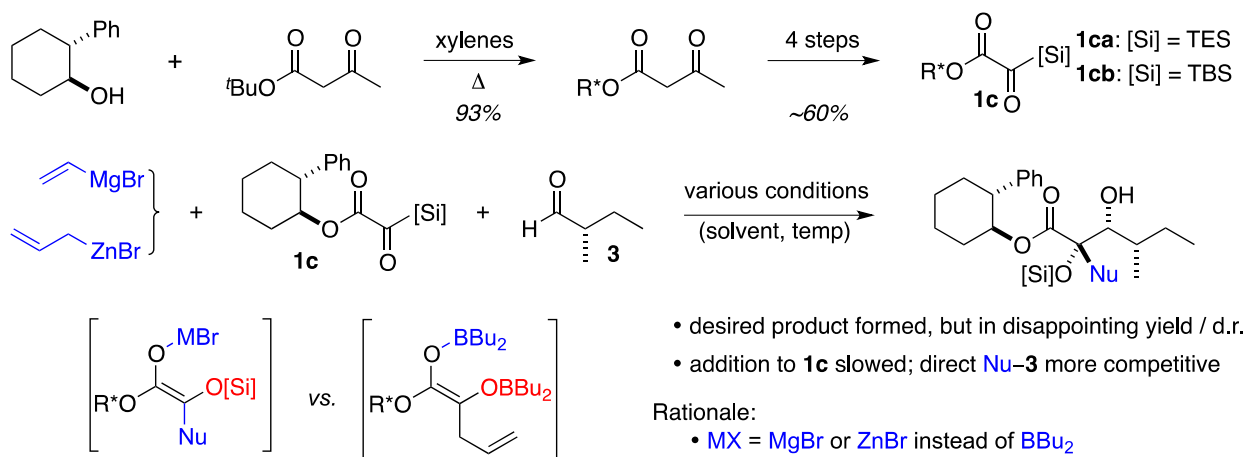

**Scheme S-2:** Auxiliary control via silyl glyoxylate. The four steps for completion of silyl glyoxylates **1c** were performed analogously to the standard protocol [2].

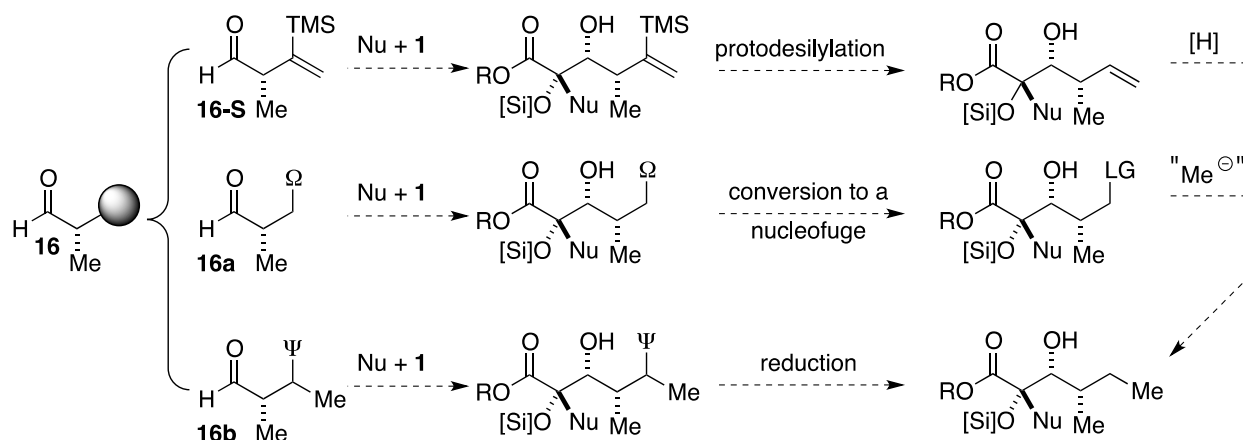

**Scheme S-3:** Auxiliary control via the aldehyde and projected post-coupling manipulation requirements.

Aldehyde **16-S** was developed and used by Sato and co-workers for a similar stereocontrolling purpose [3-6], but provided inadequate diastereocontrol in three-component couplings with vinylmagnesium bromide **4** and silyl glyoxylate **1a** as summarized in **Scheme S-4**, below. We attribute this to a conflict between the need to maintain cryogenic temperatures for **16-S** to exert stereochemical control, and the need to warm the three-component coupling mixture for good *E*-/*Z*-enolate geometry control.

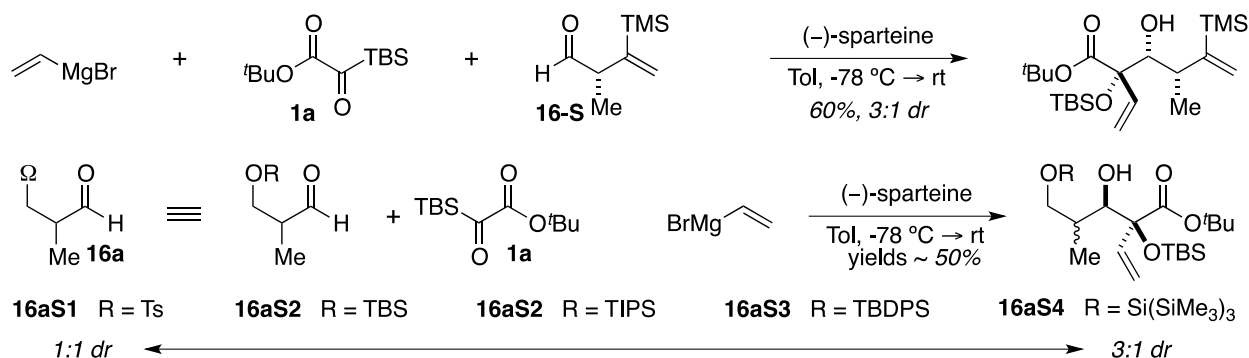

**Scheme S-4:** Three-component couplings with aldehydes of type **16-S/16a**.

The aldehydes **16a** (prepared in two steps from 2-methyl-1,3-propane diol by monoprotection and Dess-Martin oxidation) ranged in steric demand from *R* = tosyl to *R* = tris(trimethylsilyl); yields were all ~50%, while diastereoselectivity varied from 1:1 (*R* = tosyl) to ~3:1 (*R* = tris(trimethylsilyl)). From this, we judged that an extra branch point in the aldehyde backbone was needed, and aldehydes of type **16b** were investigated. The first was aldehyde **16bS1**, which was attractive for the potential to displace the mesylate with hydride (**Scheme S-5**, below). Interestingly, despite three-component couplings where oxetane formation was a relatively minor side process, subsequent derivatizations revealed this to be a major problem. Given the moderate stereochemical control (despite the small size of the mesylate), and the number of additional protection/deprotection concession steps deemed necessary to circumvent this problem, the dithiane aldehyde **16ba** was developed and pursued.

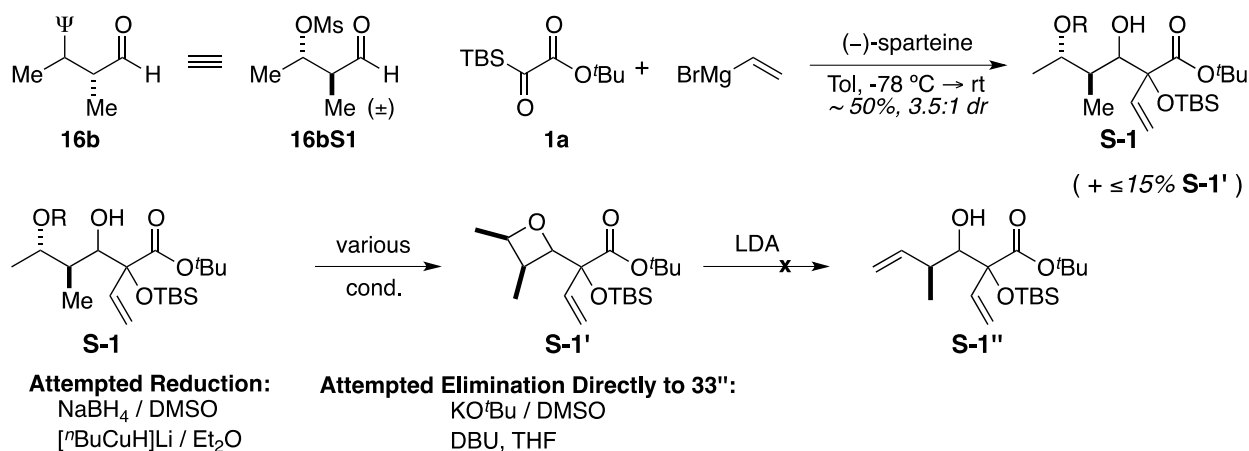

**Scheme S-5:** An aldehyde with a reducible group  $\Psi$ .

### Synthesis of dithiane aldehyde **16ba**

The route to the dithiane aldehyde **16ba** is summarized below.

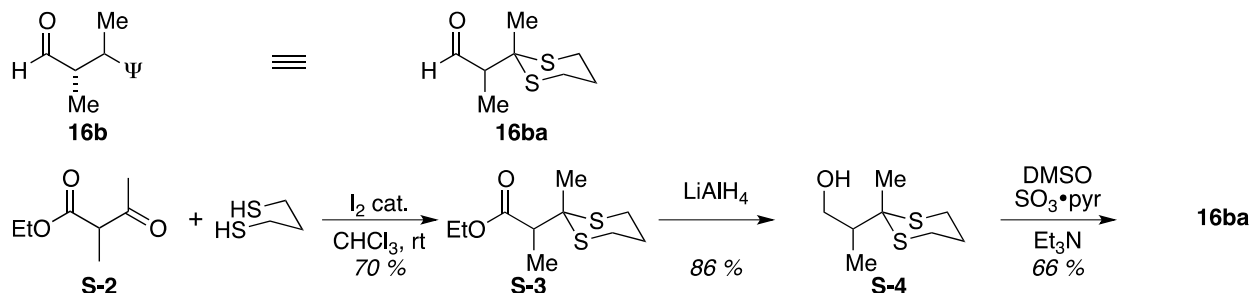

**Scheme S-6:** Route to the dithiane aldehyde **16ba**.

### Alternative methods for nucleophile generation/3-C-C

As summarized in **Scheme S-7**, low-temperature Li/I exchange [7] (with or without transmetalation to magnesium or zinc) to provide a vinyl nucleophile **27-S** led to complex mixtures and silyl glyoxylate oligomerization in attempted three-component coupling reactions. On the other hand, generation of a vinylzinc nucleophile using the method of Wipf (with [8] or without [9] an accelerating ligand) led to a weaker nucleophile, and under these conditions silyl glyoxylate dimerization and elimination [10] was dominant.

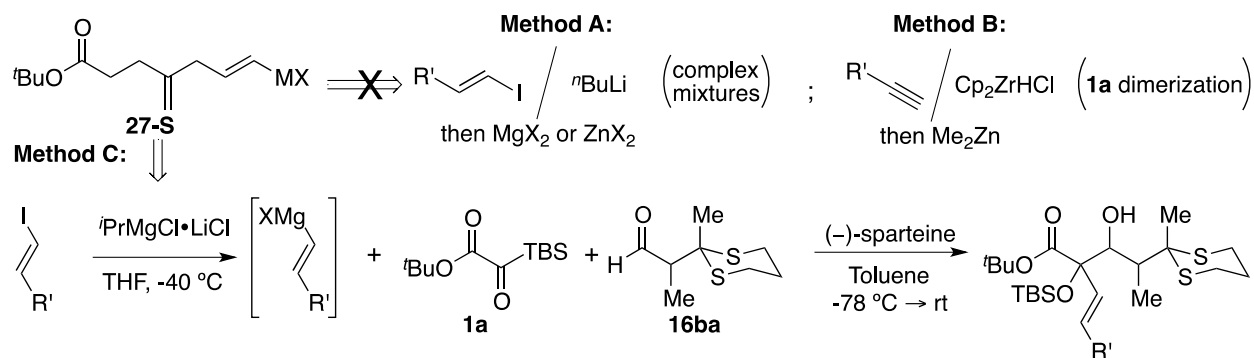

Test substrate three component coupling yields:

$\text{R}' = \text{nHex}$  : 56%    $\text{R}' = \text{Ph}$  : 63%    $\text{R}' = (\text{CH}_2)_2\text{Ph}$  : 50%

**Scheme S-7:** Potential methods for generating the vinyl nucleophile for three-component

coupling. All three-component coupling reactions with aldehyde **16ba** proceeded with >20:1 diastereoselectivity.

### Discussion of desulfurization attempts

Due to ready availability of three-component coupling product **17**, this compound was used as a model system for the desulfurization of three-component coupling product **28** as summarized in **Scheme S-8**. Attempts with the following reagent systems were made: Raney Nickel [11],  $\text{NiCl}_2/\text{NaBH}_4$  [12],  $\text{Cp}_2\text{Ni}/\text{LiAlH}_4$  [13], and  $\text{Ni}(\text{OAc})_2/\text{NaH}/^t\text{AmOH}$  [14,15]. All resulted in complex mixtures, decomposition of **17**, and/or reduction of the C8–C9 alkene.

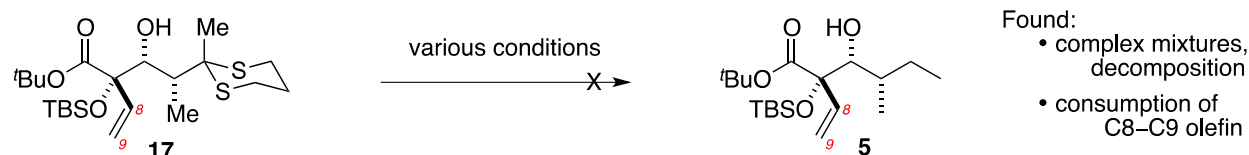

**Scheme S-8:** Summary of various single-step desulfurization attempts.

After those investigations proved difficult, a more stepwise approach to desulfurization of **17** was considered. As summarized in **Scheme S-9**, the dithiane could be deprotected to the ketone followed by conversion to a tosylhydrazone **S-5**, which formed cyclopentanol **S-9** instead of the desired product **5** upon attempted reduction [16]. This reaction presumably occurs via the monoalkyl diazene **S-6**, which forms radical **S-7** upon loss of dinitrogen, which then undergoes a 5-*exo* radical cyclization. Addition of >20 equivalents of strong  $\text{H}\cdot$  donors such as *tert*-butyl mercaptan, tributyltin hydride, and tris-(trimethylsilyl)silane prior to the second stage of the reaction was attempted with the goal of attenuating this cyclization process. These  $\text{H}\cdot$  donors were ineffective in shutting down the 5-*exo*-trig cyclization: at best, a 1:5 ratio of **S-9**:**5** was obtained with *tert*-butyl mercaptan. Evidently the 5-*exo*-trig intramolecular cyclization, perhaps in part due to the Thorpe-Ingold compression of this substrate, is much more rapid than intermolecular quenching of **S-8**.

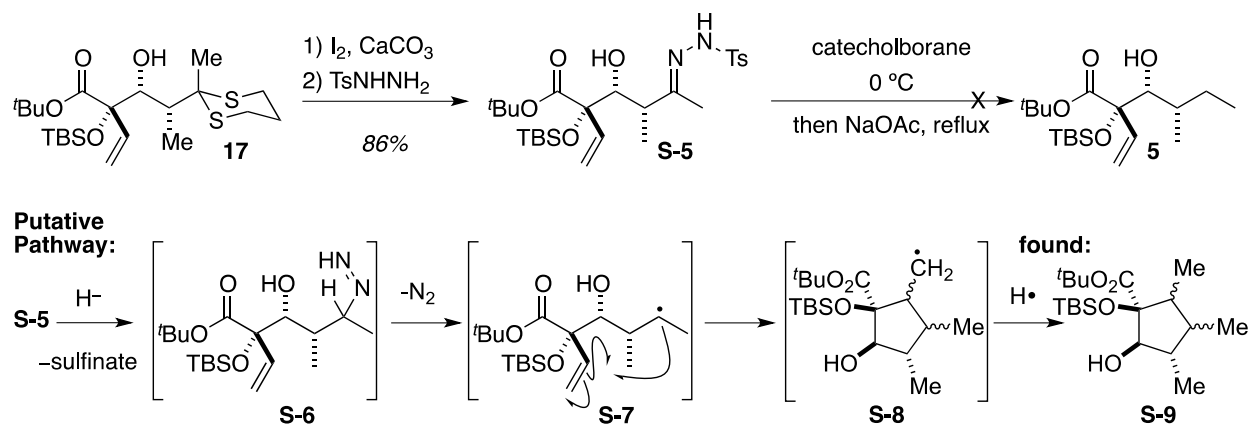

**Scheme S-9:** A more stepwise reduction attempt reveals a competing pathway, which may have impacted the single-step desulfurization attempts.

## Experimental

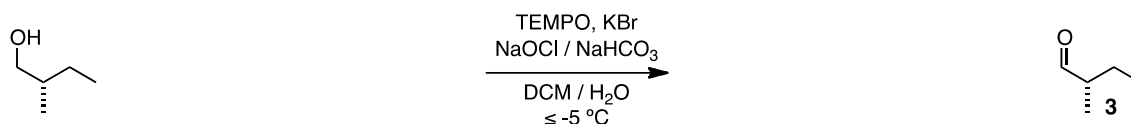

**(S)-2-methylbutanal (3).** This reaction was performed according to the reported procedure [17], with slight modifications. To a solution of (S)-2-methylbutanol (5 mL, 4.095 g, 46.5 mmol, 1.0 equiv) in DCM (15 mL) was added TEMPO (73 mg, 0.465 mmol, 0.01 equiv). A solution of potassium bromide (553 mg, 4.65 mmol, 0.10 equiv) in H<sub>2</sub>O (approx. 2 mL) was added, and the resulting biphasic mixture was cooled in an ice/salt/brine bath for 15 min. Sodium bicarbonate (840 mg) was added to buffer the commercial aqueous solution of sodium hypochlorite (0.7 M, 73 mL, 51.1 mmol, 1.1 equiv), which was placed in a pressure-equalizing addition funnel. The buffered oxidant solution was added dropwise to the reaction mixture such that the total time for addition was 15–20 min (approx. 1 drop/sec). After 5 additional min, the reaction was allowed to warm to room temperature, and after an additional 5 min the layers were separated. The aqueous layer was extracted with additional DCM (3 × 25 mL), and the combined organic extracts were washed with 1 M HCl (30 mL) to which KI (approx. 300 mg) had been added (this treatment caused the organic layer to become deep red). The organic layer was subsequently washed with H<sub>2</sub>O (30 mL), sat. aq Na<sub>2</sub>S<sub>2</sub>O<sub>3</sub> (30 mL), H<sub>2</sub>O (30 mL), sat. NaHCO<sub>3</sub> (30 mL), H<sub>2</sub>O (30 mL), brine (30 mL), and dried over Na<sub>2</sub>SO<sub>4</sub>. The mixture was filtered, and the bulk of the solvent was distilled at atmospheric pressure until the vapor temperature began to rise past 40 °C. At this point, the dilute solution of aldehyde in DCM was stored in the freezer until ready for use. Prior to use, a portion of the stock aldehyde solution was distilled further using a microscale Hickman distillation tube; the desired aldehyde was distilled from the less volatile acid (from overoxidation) and aldehyde decomposition byproducts. The residual DCM content was quantified by NMR, and the aldehyde was typically used as a concentrated solution. This treatment led to aldehyde loss (early portions of its azeotrope with DCM were discarded), but it avoided the total decomposition of the aldehyde, which has an exceedingly short shelf-life when highly concentrated (~1 week in the glovebox freezer).

### General procedure A: Three-component coupling reactions with vinyl Grignard

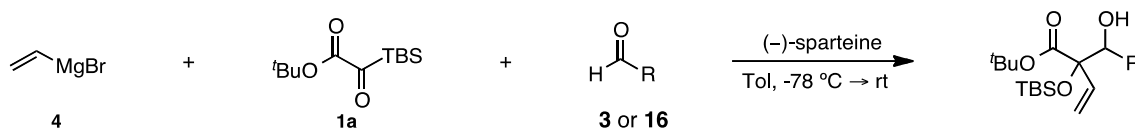

To a solution of (–)-sparteine (1.5 equiv) in dry toluene at –78 °C under N<sub>2</sub> was added a solution of vinylmagnesium bromide (**4**, solution in THF, 1.5 equiv). A solution of silyl glyoxylate **1a** (1.0 equiv) and an aldehyde (1.5 equiv) in dry toluene was prepared and cooled to –78 °C for ≥15 min, at which point the (–)-sparteine/Grignard solution was transferred into the reaction via cannula. After an additional 15 min, the solution was warmed to room temperature and stirred for ≥1.5 h before quenching with 10% aq AcOH (v/v). The reaction was diluted with H<sub>2</sub>O, the layers were separated, and the aqueous layer was extracted with Et<sub>2</sub>O three times. The combined organic extracts were washed with H<sub>2</sub>O and brine, dried over MgSO<sub>4</sub>, and concentrated *in vacuo*. The crude residue was purified by flash column chromatography using the indicated solvent



system. This procedure was used to investigate the three-component coupling reactions with all aldehydes of type **16**, although particular details for all of these will not be reproduced here.

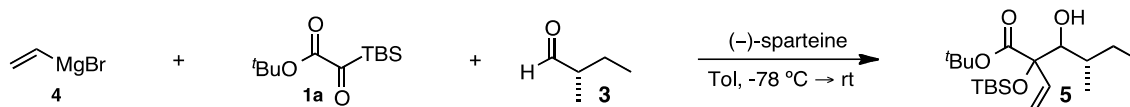

**(4S)-tert-butyl 2-(tert-butyldimethylsilyloxy)-3-hydroxy-4-methyl-2-vinylhexanoate (5).** This reaction was conducted according to General Procedure A, using vinylmagnesium bromide (**4**, 0.7 M in THF, 7.6 mL, 5.31 mmol, 2 equiv) complexed with (-)-sparteine (1.24 g, 5.31 mmol, 2 equiv) in 20 mL toluene, which was added to a solution of *t*-Bu/TBS silyl glyoxylate **1a** (650 mg, 2.65 mmol, 1.0 equiv), and (*S*)-2-methylbutanal (**3**, 5.31 mmol, 2 equiv) in 40 mL dry toluene. In this particular run, the yield was 610 mg of product as a clear, slightly yellow oil (1.7 mmol, 64% yield). The dr was > 20:1 *syn:anti*, ≤ 1.7:1 facial selectivity (**5:5'**). Analytical data for **5/5'**: **IR** (thin film, cm<sup>-1</sup>): 3582, 3480, 2959, 2931, 2858, 1747, 1639, 1472, 1463, 1393, 1369, 1253, 1156, 1056, 1005, 926, 838, 780; **<sup>1</sup>H NMR** (600 MHz, CDCl<sub>3</sub>): *major diastereomer 5*: δ 5.95 (dd, *J* = 17.4, 10.8 Hz, 1H), 5.40 (d, *J* = 17.4 Hz, 1H), 5.22 (d, *J* = 10.8 Hz, 1H), 3.72 (dd, *J* = 10.8, 3 Hz, 1H), 2.41 (d, *J* = 10.8 Hz, 1H), 1.75-1.65 (m, 2H), 1.49 (s, 9H), 1.28-1.22 (m, 1H), 0.93 (d, *J* = 7.2 Hz, 3H), 0.92 (s, 9H), 0.88 (t, *J* = 7.2 Hz, 3H), 0.20 (s, 3H), 0.11 (s, 3H); *resolved signals for minor diastereomer 5'*: δ 5.39 (d, *J* = 17.4 Hz, 1H), 5.20 (d, *J* = 10.8 Hz, 1H), 3.60 (dd, *J* = 10.8, 5.4 Hz, 1H), 2.22 (d, *J* = 10.8 Hz, 1H), 0.12 (s, 3H); **<sup>13</sup>C NMR** (150 MHz, CDCl<sub>3</sub>): *both diastereomers*: δ 171.8, 171.6, 138.4, 138.3, 116.1, 115.8, 84.3, 83.8, 82.4, 82.3, 80.7, 78.8, 36.3, 35.3, 28.6, 27.97, 27.96, 26.37, 26.33, 24.0, 19.18, 19.14, 17.7, 13.6, 11.7, 11.4, -2.26, -2.29, -2.38 (two coincident resonances); **TLC** (5% EtOAc/hexanes), *R<sub>f</sub>* 0.26 (CAM); **LRMS** (ESI): Calcd. for C<sub>19</sub>H<sub>38</sub>O<sub>4</sub>+Na: 381.24, Found: 381.25.

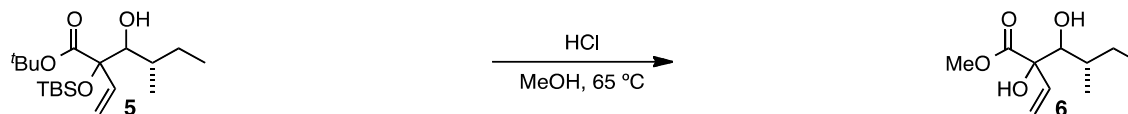

**(4S)-methyl 2,3-dihydroxy-4-methyl-2-vinylhexanoate (6/6').** The title compound was prepared using a solution of methanolic HCl, generated as follows: to a long test tube containing methanol (~10 mL) was carefully added acetyl chloride (0.21 mL, 0.231 g, 3 mmol, 3 equiv) slowly, dropwise (audible popping sound). This solution was used to dissolve the starting material **5/5'** (359 mg, 1.0 mmol, 1.0 equiv) and transfer it to a 50 mL round-bottomed flask equipped with a stir bar, to which was subsequently affixed a reflux condenser. Another 3 mL of methanol was used to ensure complete transfer of the starting material to the reaction flask. The reaction was heated under reflux, open to air, until it was judged complete by TLC analysis (a compound of intermediate *R<sub>f</sub>*, isolated once and determined to be the desilylated *tert*-butyl ester, appears *en route* to the desired product of lower *R<sub>f</sub>*). Upon completion, the reaction was poured into a separatory funnel containing H<sub>2</sub>O (~75 mL), and Et<sub>2</sub>O (~10 mL) was added to form two layers, which were shaken and separated. The aqueous layer was extracted with Et<sub>2</sub>O (3 × 10 mL), and the combined organic extracts were washed with H<sub>2</sub>O (2 × 20 mL) and brine (20 mL), and dried over MgSO<sub>4</sub>. Filtration and careful concentration *in vacuo* afforded 200 mg (~1 mmol, quant. yield) of the title compound **6/6'** as a clear oil, which required no further purification. Purification in an attempt to separate the diastereomers at this stage was unsuccessful. Analytical data for **6/6'**: **IR** (thin film, cm<sup>-1</sup>): 3499, 2960, 2934, 2877, 1738, 1638, 1462, 1439, 1402, 1245, 1170, 1004, 932, 789; **<sup>1</sup>H NMR** (600 MHz, CDCl<sub>3</sub>): *major diastereomer 20*: δ 5.91 (dd, *J* = 17.4, 10.8 Hz, 1H), 5.59 (dd, *J* = 17.4, 1.2 Hz, 1H), 5.25 (d, *J* = 10.8, 1.2 Hz, 1H), 3.95 (d, *J* = 1.8 Hz,

1H), 3.81 (s, 3H), 3.6 (br s, 1H), 2.1 (br s, 1H), 1.70-1.60 (m, 1H), 1.45-1.38 (m, 1H), 1.30-1.20 (m, 1H), 0.90-0.85 (m, 6H); *resolved signals for minor diastereomer 20'*:  $\delta$  5.94 (dd,  $J = 17.4$ , 10.8 Hz, 1H), 5.57 (d,  $J = 17.4$ , 1.2 Hz, 1H), 5.23 (dd,  $J = 10.8$ , 1.2 Hz, 1H), 3.80 (s, 3H), 1.75-1.65 (m, 2H), 1.10-1.00 (m, 1H), 0.95 (d,  $J = 7.2$  Hz, 3H);  $^{13}\text{C}$  NMR (150 MHz,  $\text{CDCl}_3$ ): *both diastereomers*:  $\delta$  175.1, 175.0, 135.6, 135.2, 116.1, 115.9, 81.9, 81.8, 78.2, 75.8, 53.50, 53.47, 36.0, 35.3, 28.2, 22.8, 17.4, 12.8, 11.8, 11.5; **TLC** (20% EtOAc/hexanes),  $R_f$  0.21 (CAM only); **LRMS** (ESI): Calcd. for  $\text{C}_{10}\text{H}_{18}\text{O}_4 + \text{Na}$ : 225.11, Found: 225.12.

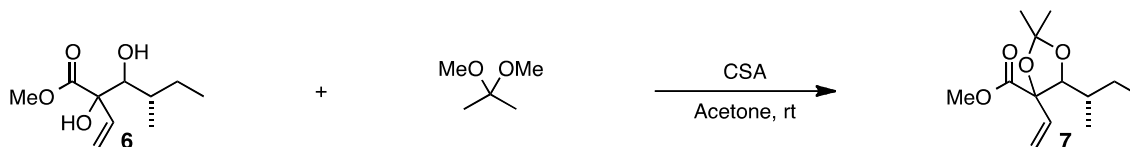

**Methyl 5-((S)-sec-butyl)-2,2-dimethyl-4-vinyl-1,3-dioxolane-4-carboxylate (7/7')**. To a solution of **6/6'** (200 mg, approx. 1 mmol, 1.0 equiv) and 2,2-dimethoxypropane (5 mL) in acetone (5 mL) was added ( $\pm$ )-camphorsulfonic acid (46 mg, 0.2 mmol, 0.2 equiv). The reaction was stirred at room temperature without rigorous exclusion of air and moisture until TLC analysis indicated complete consumption of **6/6'**. The reaction was quenched with 5%  $\text{Et}_3\text{N}$ /hexanes (2 mL) and concentrated *in vacuo*. The residue was purified by flash column chromatography using 15%  $\text{Et}_2\text{O}$ /hexanes as eluent to afford 204 mg (0.84 mmol, 84% in two steps from the three-component coupling) of **7** as a clear oil. Attempted diastereomer separation at this stage was also unsuccessful. Analytical data for **7**: **IR** (thin film,  $\text{cm}^{-1}$ ): 2965, 2878, 1737, 1638, 1381, 1261, 1218, 1119, 1039, 929, 891;  $^1\text{H}$  NMR (600 MHz,  $\text{CDCl}_3$ ): *major diastereomer*:  $\delta$  6.04 (dd,  $J = 16.8$ , 13.2 Hz, 1H), 5.54 (d,  $J = 16.8$  Hz, 1H), 5.33 (d,  $J = 13.2$  Hz, 1H), 4.13 (d,  $J = 7.8$  Hz, 1H), 3.77 (s, 3H), 1.72-1.60 (m, 2H), 1.54 (s, 3H), 1.43 (s, 3H), 1.15-1.10 (m, 1H), 0.98 (d,  $J = 6.6$  Hz, 3H), 0.89 (t,  $J = 7.2$  Hz, 3H); *resolved signals for minor diastereomer*:  $\delta$  6.08 (dd,  $J = 17.4$ , 10.8 Hz, 1H), 5.34 (d,  $J = 10.8$  Hz, 1H), 4.09 (d,  $J = 9.6$  Hz, 1H), 1.46 (s, 3H), 1.28-1.20 (m, 1H);  $^{13}\text{C}$  NMR (150 MHz,  $\text{CDCl}_3$ ): *both diastereomers*:  $\delta$  172.97, 172.93, 133.8, 133.5, 117.3, 117.1, 109.2, 86.0, 85.5, 85.2, 85.0, 52.7, 35.0, 34.5, 27.24, 27.20, 26.1, 25.9, 25.1, 25.0, 15.6, 14.8, 11.1, 10.2 (two coincident resonances, likely 109.2 and 52.7); **TLC** (20% EtOAc/hexanes),  $R_f$  0.55 (CAM only); **LRMS** (ESI): Calcd. for  $\text{C}_{13}\text{H}_{22}\text{O}_4 + \text{Na}$ : 265.14, Found: 265.14

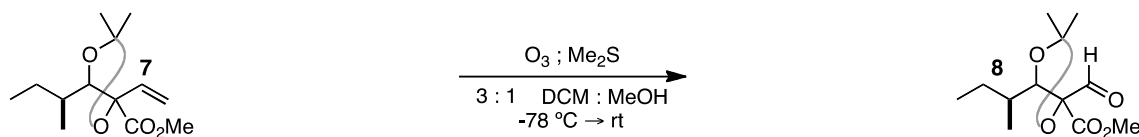

**Methyl 5-((S)-sec-butyl)-4-formyl-2,2-dimethyl-1,3-dioxolane-4-carboxylate (8/8')**. A solution of **(7/7')** (41 mg, 0.169 mmol, 1.0 equiv) in 4 mL DCM:MeOH (3:1) was cooled to  $-78^\circ\text{C}$  and sparged with  $\text{N}_2$  for 5 min. Ozone was subsequently passed through the solution until the characteristic blue color of ozone saturation was achieved (~10 min). TLC analysis indicated complete consumption of **(7/7')**, and the solution was sparged with  $\text{N}_2$  until colorless again. Dimethyl sulfide (0.06 mL, 53 mg, 5.0 equiv) was added, and the reaction mixture was allowed to warm to room temperature and stirred overnight (12 h). TLC analysis to ensure the absence of peroxides was performed, and the reaction mixture was poured into  $\text{H}_2\text{O}$  (50 mL). The layers were separated, the aqueous layer was extracted with 1:1  $\text{Et}_2\text{O}$ /pentanes ( $3 \times 10$  mL), and the combined organic extracts were washed with  $\text{H}_2\text{O}$  ( $2 \times 20$  mL) and brine (20 mL), and dried over  $\text{MgSO}_4$ . Filtration and careful concentration *in vacuo* afforded the crude aldehyde which was purified on a silica column that had been packed with 5%  $\text{Et}_3\text{N}$ /hexanes and flushed with

pentanes. Elution with 10% Et<sub>2</sub>O/pentanes afforded 36 mg (0.147 mmol, 87% yield) of the desired product (**8/8'**) as a clear oil. Analytical data for (**8/8'**): **IR** (thin film, cm<sup>-1</sup>): 2967, 2938, 2879, 1754, 1737, 1637, 1459, 1438, 1384, 1261, 1221, 1095, 1071, 881; **<sup>1</sup>H NMR** (600 MHz, CDCl<sub>3</sub>): *major diastereomer*: δ 9.69 (s, 1H), 4.39 (d, *J* = 7.8 Hz, 1H), 3.83 (s, 3H), 1.78-1.70 (m, 1H), 1.66 (s, 3H), 1.63-1.55 (m, 1H), 1.43 (s, 3H), 1.25-1.15 (m, 1H), 0.97 (d, *J* = 6.6 Hz, 3H), 0.91 (t, *J* = 7.2 Hz, 3H); *resolved signals for minor diastereomer*: δ 9.68 (s, 1H), 4.33 (d, *J* = 9.6 Hz, 1H), 1.70-1.66 (m, 1H); **<sup>13</sup>C NMR** (150 MHz, CDCl<sub>3</sub>): *both diastereomers*: δ 196.8, 196.5, 111.5, 111.4, 87.8, 87.3, 86.5, 86.3, 53.2, 53.1, 34.2, 33.9, 30.3, 27.02, 26.99, 26.4, 25.9, 25.0, 15.8, 14.7, 11.1, 10.2 (two coincident resonances); **TLC** (10% EtOAc/hexanes, pretreated plate), *R<sub>f</sub>* 0.19 (CAM only); **LRMS** (ESI): Calcd. for C<sub>12</sub>H<sub>20</sub>O<sub>5</sub>+Na: 267.12, Found: 267.12

### Preparation of sulfones for and execution of modified Julia olefination:

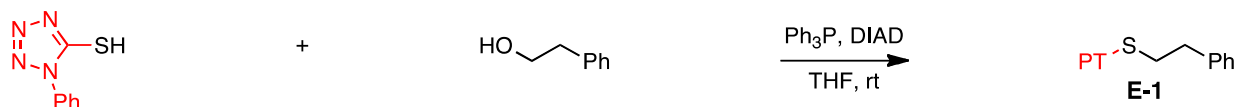

**5-(phenethylthio)-1-phenyl-1H-tetrazole (E-1).** This procedure can be taken as representative for sulfide formation via Mitsunobu reaction with this thiol (*vide infra*). A related procedure for the preparation of **E-1** has been reported previously [18]. To a solution of triphenylphosphine (1.062 g, 4.05 mmol, 1.53 equiv), 1-phenyl-1H-tetrazole-5-thiol (0.943 g, 5.29 mmol, 2 equiv), and 2-phenylethanol (0.32 mL, 0.323 g, 2.65 mmol, 1.0 equiv) in THF (25 mL) at 0 °C was added diisopropylazodicarboxylate (1 mL, 0.974 g, 4.815 mmol, 1.82 equiv), which caused the solution to turn bright yellow. The reaction mixture was allowed to warm to room temperature and stirred overnight (16 h) until it was poured into a solution of 80 mL brine and 20 mL H<sub>2</sub>O. The layers were shaken and separated, and the aqueous layer was extracted with Et<sub>2</sub>O (3 × 25 mL). The combined extracts were washed with H<sub>2</sub>O (20 mL), brine (20 mL), dried over MgSO<sub>4</sub>, and concentrated *in vacuo* to a sticky yellow semisolid. Purification was effected using a dry-loaded silica gel column, eluting with 10% EtOAc/hexanes to afford 700 mg (2.6 mmol, 98% yield) of the desired product as a thick oil. Characterization data for this compound were consistent with those previously reported [18]: **<sup>1</sup>H NMR** (300 MHz, CDCl<sub>3</sub>): δ 7.56 (br s, 4H), 7.35-7.25 (m, 6H), 3.64 (d, *J* = 7.2 Hz, 2 H), 3.16 (d, *J* = 7.2 Hz, 2 H); **TLC** (20% EtOAc/hexanes) *R<sub>f</sub>* 0.45 (UV/CAM).

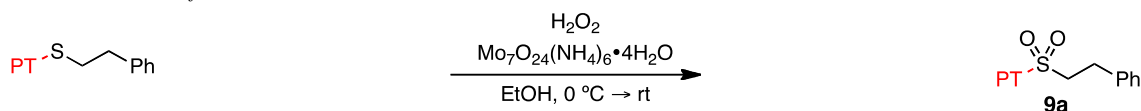

**5-(phenethylsulfonyl)-1-phenyl-1H-tetrazole (9a).** This procedure is representative of the oxidation of a sulfide to a sulfone, and was quite general for a variety of substrates. A related procedure for the preparation of **9a** has been reported previously [18]. A solution of the sulfide (700 mg, 2.6 mmol, 1.0 equiv) in EtOH (25 mL) was cooled to 0 °C while a solution of ammonium molybdate tetrahydrate in 30% aq H<sub>2</sub>O<sub>2</sub> (240 mg/mL) was prepared. This bright yellow solution (3 mL) was added to the solution of the substrate in EtOH, and allowed to warm to room temperature with stirring overnight open to air. The reaction was poured into 100 mL H<sub>2</sub>O and extracted with EtOAc (3 × 20 mL). The combined organic extracts were washed with H<sub>2</sub>O (2 × 20 mL) and brine (20 mL), dried over MgSO<sub>4</sub>, and concentrated *in vacuo* to a solid which required no further purification (735 mg, 90% yield). Analytical data for **9a** were consistent with those previously reported [18]: **IR** (thin film, cm<sup>-1</sup>): 3065, 3030, 2920, 1595, 1498, 1456, 1342, 1238, 1154, 1076, 916, 764; **<sup>1</sup>H NMR** (400 MHz, CDCl<sub>3</sub>): δ 7.71 (m, 2H),

7.66-7.60 (m, 3H), 7.36 (m, 2H), 7.30-7.26 (m, 3H), 4.01 (m, 2H), 3.28 (m, 2H);  $^{13}\text{C}$  NMR (150 MHz,  $\text{CDCl}_3$ ): 153.3, 136.3, 132.9, 131.5, 129.7, 129.0, 128.5, 127.4, 125.0, 57.2, 28.4; **TLC** (20% EtOAc/hexanes),  $R_f$  0.22 (UV; faint in CAM); **LRMS** (ESI): Calcd. for  $\text{C}_{15}\text{H}_{14}\text{N}_4\text{O}_2\text{S}+\text{Na}$ : 337.07, Found: 337.07; Calcd. for  $\text{C}_{15}\text{H}_{14}\text{N}_4\text{O}_2\text{S}+\text{Cs}$ : 446.99, Found: 446.99

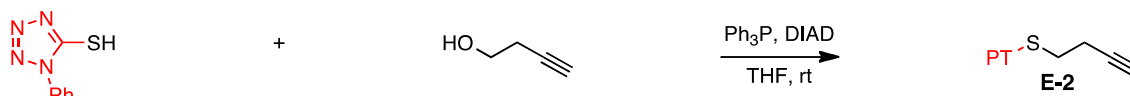

**5-(but-3-yn-1-ylthio)-1-phenyl-1H-tetrazole (E-2).** This reaction was performed analogously to the Mitsunobu procedure detailed above. Related procedures for the preparation of **E-2** have been reported previously [19,20]. The Mitsunobu reaction was conducted using triphenylphosphine (2.24 g, 8.54 mmol, 1.53 equiv), 1-phenyl-1H-tetrazole-5-thiol (2 g, 11.2 mmol, 2 equiv), and 3-butyn-1-ol (0.42 mL, 0.391 g, 5.58 mmol, 1.0 equiv), THF (50 mL), and diisopropylazodicarboxylate (2 mL, 2.054 g, 10.2 mmol, 1.82 equiv). Partial purification was achieved using flash column chromatography, eluting with 20% EtOAc/hexanes. The isolated material was contaminated by the starting thiol, which could be conveniently removed by basic extraction to afford the desired product: 1.2 g (5.2 mmol, 93% yield) as a thick semisolid. Analytical data for **E-2** were consistent with those reported [20]: **IR** (thin film,  $\text{cm}^{-1}$ ): 3293, 3064, 2934, 2118, 1597, 1499, 1462, 1414, 1388, 1281, 1243, 1091, 1015, 762;  $^1\text{H}$  NMR (600 MHz,  $\text{CDCl}_3$ ):  $\delta$  7.58-7.50 (m, 5H), 3.53 (t,  $J = 7.2$  Hz, 2H), 2.80 (dt,  $J = 6.6, 2.4$  Hz, 2H), 2.05 (t,  $J = 2.4$  Hz, 1H);  $^{13}\text{C}$  NMR (150 MHz,  $\text{CDCl}_3$ ): 153.6, 133.5, 130.2, 129.8, 123.7, 81.1, 70.6, 32.0, 19.2; **TLC** (20% EtOAc/hexanes),  $R_f$  0.25 (UV/CAM); **LRMS** (ESI): Calcd. for  $\text{C}_{11}\text{H}_{11}\text{N}_4\text{S}+\text{Na}$ : 253.05, Found: 253.06; Calcd. for  $\text{C}_{11}\text{H}_{10}\text{N}_4\text{S}+\text{Cs}$ : 362.97, Found: 362.97

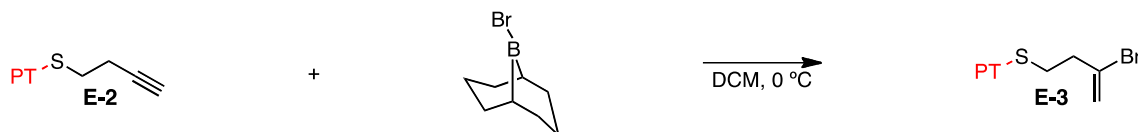

**5-((3-bromobut-3-en-1-yl)thio)-1-phenyl-1H-tetrazole (E-3).** This procedure was performed analogously to a literature procedure [21]. A cloudy suspension of sulfide **E-2** (1.2 g, 5.2 mmol, 1.0 equiv) in dry DCM (50 mL) was cooled to 0 °C under  $\text{N}_2$ . A solution of 9-Br-9-BBN (1 M in DCM, 6.25 mL, 6.25 mmol, 1.2 equiv) was added, and the mixture gradually cleared noticeably and became a pale yellow solution as the mixture was stirred for 3 h at 0 °C. Glacial acetic acid (~4 mL) was added neat, dropwise to the reaction mixture, followed 1 h later by 3 M NaOH (25 mL) and 30% aq  $\text{H}_2\text{O}_2$  (10 mL). The biphasic mixture was stirred vigorously for 30 min, and the layers were separated. The aqueous layer was extracted with DCM ( $3 \times 10$  mL), and the combined organic extracts were washed with brine (20 mL) and dried over  $\text{Na}_2\text{SO}_4$ . Concentration *in vacuo* and analysis of the crude mixture revealed that only approx. 33% conversion had occurred. Purification by flash column chromatography with 15% EtOAc/hexanes as eluent afforded 336 mg (1.08 mmol, 59% yield brsm) of the product as a clear oil. Analytical data for **E-3**: **IR** (thin film,  $\text{cm}^{-1}$ ): 3101, 3064, 2927, 1628, 1597, 1499, 1412, 1387, 1244, 1188, 1090, 1015, 896, 761;  $^1\text{H}$  NMR (600 MHz,  $\text{CDCl}_3$ ):  $\delta$  7.57-7.50 (m, 5H), 5.67 (d,  $J = 1.8$  Hz, 1H), 5.51 (d,  $J = 1.8$  Hz, 1H), 3.59 (d,  $J = 7.2$  Hz, 2H), 3.00 (d,  $J = 7.2$  Hz, 2H);  $^{13}\text{C}$  NMR (150 MHz,  $\text{CDCl}_3$ ): 153.7, 133.5, 130.4, 130.2, 129.8, 123.7, 119.5, 40.4, 31.4; **TLC** (20% EtOAc/hexanes),  $R_f$  0.32 (UV/CAM); **LRMS** (ESI): Calcd. for  $\text{C}_{11}\text{H}_{11}\text{BrN}_4\text{S}+\text{Na}$ : 332.98, Found: 332.98; Calcd. for  $\text{C}_{11}\text{H}_{11}\text{BrN}_4\text{S}+\text{Cs}$ : 442.89, Found: 442.90

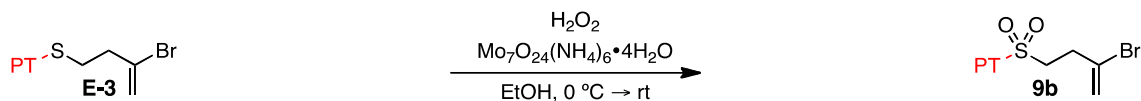

**5-((3-bromobut-3-en-1-yl)sulfonyl)-1-phenyl-1H-tetrazole (9b).** This oxidation was performed analogously to the oxidation procedure reported above for the preparation of **9a**. Here, **E-3** (335 mg, 1.075 mmol, 1 equiv), and an ammonium molybdate/aq  $\text{H}_2\text{O}_2$  solution (240 mg/mL; 1.2 mL) were employed. Purification was effected using flash column chromatography using 20% EtOAc/hexanes as eluent to afford 330 mg (0.962 mmol, 89% yield) of the product **9b** as a white solid. Analytical data for **9b**: **IR** (thin film,  $\text{cm}^{-1}$ ): 2988, 2923, 1631, 1497, 1348, 1151, 903, 763, 688;  **$^1\text{H}$  NMR** (600 MHz,  $\text{CDCl}_3$ ):  $\delta$  7.69 (d,  $J = 7.2$  Hz, 2H), 7.65-7.60 (m, 3H), 5.81 (s, 1H), 5.56 (s, 1H), 3.99 (m, 2H), 3.11 (m, 2H);  **$^{13}\text{C}$  NMR** (150 MHz,  $\text{CDCl}_3$ ): 153.2, 132.8, 131.6, 129.8, 127.5, 125.0, 120.4, 54.6, 34.4; **TLC** (20% EtOAc/hexanes),  $R_f$  0.24 (UV/CAM); **LRMS** (ESI): Calcd. for  $\text{C}_{11}\text{H}_{11}\text{BrN}_4\text{O}_2\text{S}+\text{Na}$ : 364.97, Found: 364.97

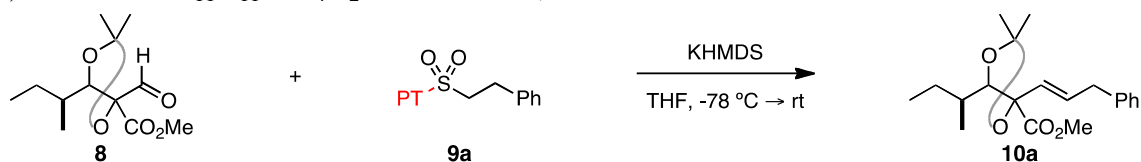

**Methyl 5-((S)-sec-butyl)-2,2-dimethyl-4-((E)-3-phenylprop-1-en-1-yl)-1,3-dioxolane-4-carboxylate (10/10a').** To a stirred solution of **9a** (33 mg, 0.104 mmol, 1.1 equiv) in dry THF (1 mL) under  $\text{N}_2$  and cooled to  $-78^\circ\text{C}$  was added a solution of potassium hexamethyldisilazide (0.5 M in toluene, 0.28 mL, 0.141 mmol, 1.5 equiv), and the clear solution became yellow. After 15 min at this temperature, a solution of aldehyde **8** (23 mg, 0.094 mmol, 1.0 equiv) in THF (1 mL) was added via syringe, followed by a THF rinse to ensure complete transfer (0.5 mL). The reaction was allowed to warm slowly to room temperature overnight (12 h), by which point the yellow color had faded and the reaction had become cloudy due to precipitate formation. TLC analysis indicated complete consumption of the aldehyde **8**, and the reaction was quenched with sat. aq  $\text{NH}_4\text{Cl}$  (5 mL). The mixture was diluted with  $\text{Et}_2\text{O}$  (5 mL) and  $\text{H}_2\text{O}$  (30 mL), the layers were separated, and the aqueous layer was extracted with  $\text{Et}_2\text{O}$  ( $3 \times 5$  mL). The combined organic extracts were washed with  $\text{H}_2\text{O}$  and brine, dried over  $\text{MgSO}_4$ , and concentrated *in vacuo*. The residue was purified by flash column chromatography using 5% EtOAc/hexanes to afford 29 mg (0.087 mmol, 93% yield) of **10a/10a'** as a clear oil. Analytical data for **10a/10a'**:  **$^1\text{H}$  NMR** (300 MHz,  $\text{CDCl}_3$ ): *major diastereomer*:  $\delta$  7.30-7.26 (m, 2H), 7.22-7.15 (m, 3H), 6.12-6.02 (m, 1H), 5.63 (d,  $J = 15.3$  Hz, 1H), 4.11 (d,  $J = 5.1$  Hz, 1H), 3.77 (s, 3H), 3.48-3.40 (m, 2H), 1.75-1.60 (m, 1H), 1.50 (s, 3H), 1.42 (s, 3H), 1.30-1.00 (m, 2H), 0.97 (d,  $J = 6.3$  Hz, 3H), 0.86 (t,  $J = 7.2$  Hz, 3H); *resolved signals for minor diastereomer*:  $\delta$  5.72 (d,  $J = 15.3$  Hz, 1H), 4.09 (d,  $J = 5.1$  Hz, 1H), 1.43 (s, 3H); **TLC** (20% EtOAc/hexanes)  $R_f$  0.51 (CAM).

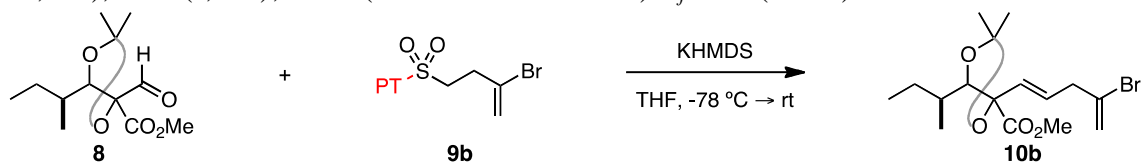

**Methyl 4-((E)-4-bromopenta-1,4-dien-1-yl)-5-((S)-sec-butyl)-2,2-dimethyl-1,3-dioxolane-4-carboxylate (10b/10b').** The reaction was performed according to the Julia olefination procedure above, using **9b** (42 mg, 0.123 mmol, 1.0 equiv), KHMDS (0.5M in toluene, 0.37 mL, 0.184 mmol, 1.5 equiv), and aldehyde **8** (30 mg, 0.123 mmol, 1.0 equiv) and the same volumes of THF. Purification was effected by flash column chromatography using 10% EtOAc/hexanes as

eluent, to afford 35 mg (0.097 mmol, 79% yield) as a clear oil. Analytical data for **10b/10b'**: **IR** (thin film,  $\text{cm}^{-1}$ ): 2964, 2936, 2877, 1738, 1630, 1460, 1435, 1381, 1371, 1259, 1216, 1117, 1065, 1033, 976, 893;  **$^1\text{H}$  NMR** (600 MHz,  $\text{CDCl}_3$ ): *major diastereomer*:  $\delta$  5.96-5.88 (m, 1H), 5.78 (d,  $J = 15.6$  Hz, 1H), 5.6 (s, 1H), 5.45 (s, 1H), 4.11 (d,  $J = 7.2$  Hz, 1H), 3.77 (s, 3H), 3.23 (m, 2H), 1.72-1.65 (m, 2H), 1.53 (s, 3H), 1.44 (s, 3H), 1.43 (m, 1H), 0.87 (m, 6H); *resolved signals for minor diastereomer*:  $\delta$  5.82 (d,  $J = 15.6$  Hz, 1H), 4.07 (d,  $J = 9.6$  Hz, 1H), 1.445 (s, 3H), 1.25-1.15 (m, 1H), 1.15-1.05 (m, 1H), 0.97 (d,  $J = 6.6$  Hz);  **$^{13}\text{C}$  NMR** (150 MHz,  $\text{CDCl}_3$ ): *both diastereomers*:  $\delta$  172.92, 172.89, 131.7, 131.5, 129.3, 129.2, 128.2, 128.1, 117.42, 117.38, 109.2, 86.1, 85.6, 84.8, 84.6, 52.7, 44.1, 35.0, 34.5, 27.29, 27.26, 26.1, 25.9, 25.0, 24.9, 15.6, 14.9, 11.1, 10.3 (three coincident resonances: likely 109.2, 52.7, and 44.1); **TLC** (10% EtOAc/hexanes, pretreated plate),  $R_f$  0.38 (CAM only); **LRMS** (ESI): Calcd. for  $\text{C}_{16}\text{H}_{25}\text{BrO}_4 + \text{Na}$ : 383.08, Found: 383.08; Calcd. for  $\text{C}_{16}\text{H}_{25}\text{BrO}_4 + \text{Cs}$ : 493.00, Found: 493.00.

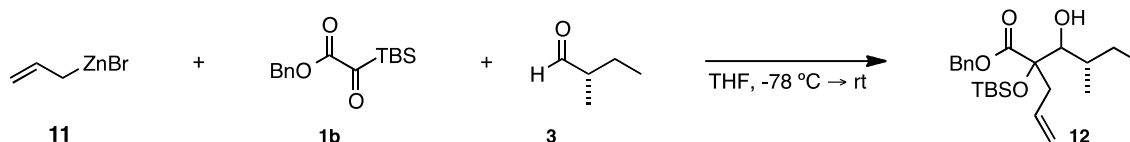

**(4S)-benzyl 2-allyl-2-(tert-butyldimethylsilyloxy)-3-hydroxy-4-methylhexanoate (12).**

Allylzinc bromide **11** was prepared analogously to a reported procedure [22]. The zinc dust could be activated either with 1,2-dibromoethane/TMSCl or using  $\text{Br}_2$ . A typical preparation using the latter method will be described: a dry flask with stir bar was charged with Zn dust (~330 mg, approx. 5 mmol, 1.2 equiv) in the glovebox, sealed with a septum, and brought out of the glovebox. THF (4 mL) was added, and the vigorously stirred suspension was cooled to 0 °C for 5 min, and  $\text{Br}_2$  (0.03 mL, 0.5 mmol, 0.10 equiv relative to  $\text{Zn}^0$ ) was added dropwise. The  $\text{Br}_2$  color quickly dissipated, and after an additional 5 min allyl bromide (0.35 mL, 4 mmol, 1.0 equiv) was added dropwise. The suspension was stirred at 0 °C for 1 h, at which point stirring was stopped and the excess of Zn dust was allowed to settle. The solution of allylzinc bromide thus prepared was assumed to be 1.0 M.

The appropriate amount of such a solution (in this case: 0.30 mL, 0.30 mmol, 1.5 equiv) was added to a stirred solution of Bn/TBS silyl glyoxylate **1b** (56 mg, 0.20 mmol, 1.0 equiv) and (S)-2-methylbutanal **3** (0.30 mmol, 1.5 equiv) in 3 mL THF, which had been cooled to -78 °C for  $\geq 15$  min. The bright yellow gold color due to **1b** dissipated, and 15 min later the reaction was warmed to rt for 3 h and quenched with sat.  $\text{NH}_4\text{Cl}$  (5 mL). The mixture was diluted with  $\text{H}_2\text{O}$  (30 mL), and the layers were separated. The aqueous layer was extracted with  $\text{Et}_2\text{O}$  ( $3 \times 10$  mL), and the combined extracts were washed with brine and dried over  $\text{MgSO}_4$ . The mixture was filtered and concentrated *in vacuo*, and the residue was purified by flash column chromatography eluting with 2.5%  $\text{Et}_2\text{O}$ /hexanes. “Diastereomers A” eluted first, followed by “diastereomers B” (typically with mixed fractions in between), and the combined yield in this run was 48 mg (0.118 mmol, 60% yield) of approx. 1:2.4 “diastereomers A”：“diastereomers B”.  **$^1\text{H}$  NMR** for **12**, “diastereomers A”: (400 MHz,  $\text{CDCl}_3$ ): *major diastereomer*:  $\delta$  5.76-5.60 (m, 1H), 5.70-5.60 (m, 2H), 5.60-4.48 (m, 2H), 3.67 (dd,  $J = 10.8, 2.4$  Hz, 1H), 2.72-2.62 (m, 1H), 2.62-2.52 (m, 1H), 2.0 (d,  $J = 10.8$ , 1H), 1.45-1.35 (m, 2H), 1.20-1.08 (m, 1H), 0.88 (s, 9H), 0.84 (d,  $J = 6.8$  Hz, 3H), 0.75 (t,  $J = 7.2$  Hz, 3H), 0.19 (s, 3H), 0.15 (s, 3H); *resolved signals for minor diastereomer*:  $\delta$  3.59 (dd,  $J = 10.4, 6.6$  Hz, 1H), 1.80 (d,  $J = 10.4$  Hz, 1H), 1.70-1.60 (m, 1H), 1.55-1.45 (m, 1H), 0.95-0.88 (m, 1H), 0.88 (s, 9H), 0.83-0.77 (m, 6H), 0.17 (s, 3H), 0.16 (s, 3H); **TLC** (5% EtOAc/hexanes)  $R_f$  0.27 (CAM).

Analytical data for **12**, “diastereomers B”: **IR** (thin film,  $\text{cm}^{-1}$ ): 3464, 3078, 2957, 2930, 2857, 1750, 1641, 1462, 1388, 1254, 1215, 1139, 919, 837, 778;  **$^1\text{H}$  NMR** (600 MHz,  $\text{CDCl}_3$ ): *major diastereomer*:  $\delta$  7.5 (br s, 5H), 5.78-5.75 (m, 1H), 5.15 (d,  $J = 12$  Hz, 1H), 5.12 (d,  $J = 12$  Hz, 1H), 5.06 (app d,  $J = 12$  Hz, 2H), 3.66 (dd,  $J = 10.8, 2.4$  Hz, 1H), 2.66 (dt,  $J = 14.4, 7.2$  Hz, 1H), 2.53 (dt,  $J = 14.4, 7.2$  Hz, 1H), 2.36 (d,  $J = 10.8$  Hz, 1H), 1.70-1.60 (m, 1H), 1.45-1.39 (m, 1H), 1.30-1.24 (m, 1H), 0.87 (t,  $J = 7.2$  Hz, 3H), 0.87 (s, 9H), 0.77 (d,  $J = 6.6$  Hz, 3H), 0.15 (s, 3H), 0.12 (s, 3H); *resolved signals for minor diastereomer*:  $\delta$  3.56 (dd,  $J = 9.6, 3.6$  Hz, 1H), 2.30 (d,  $J = 9.6$  Hz, 1H), 0.93 (d,  $J = 7.2$  Hz, 3H), 0.83 (t,  $J = 7.2$  Hz);  **$^{13}\text{C}$  NMR** (150 MHz,  $\text{CDCl}_3$ ): *both diastereomers*  $\delta$  174.0, 173.8, 134.94, 134.90, 132.8, 132.6, 128.9, 128.8, 128.61, 128.59, 128.57, 119.0, 118.9, 83.0, 82.7, 80.3, 78.1, 67.34, 67.27, 42.3, 41.9, 35.1, 34.4, 28.7, 26.2, 26.1, 23.0, 19.0, 17.6, 12.9, 11.9, 11.6, -2.0, -2.2, -2.46, -2.54 (two coincident resonances); **TLC** (5% EtOAc/hexanes),  $R_f$  0.18 (CAM); **LRMS** (ESI): Calcd. for  $\text{C}_{23}\text{H}_{38}\text{O}_4 + \text{Na}$ : 429.24, Found: 429.25.

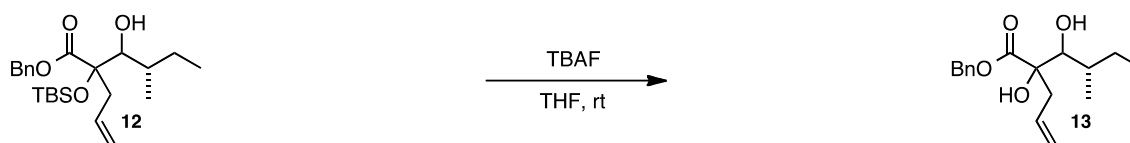

**(4S)-benzyl 2-allyl-2,3-dihydroxy-4-methylhexanoate (13)**. “Diastereomers A” of three-component coupling product **12** (180 mg, 0.443 mmol, 1.0 equiv) were dissolved in 2 mL THF, and then TBAF (1 M in THF, 2.2 mL, 2.2 mmol, 5 equiv) was added and the reaction mixture was stirred at room temperature for 1.5 h. The mixture was poured into  $\text{H}_2\text{O}$  (50 mL), and the layers were shaken and separated. The aqueous layer was extracted with  $\text{Et}_2\text{O}$  ( $3 \times 10$  mL), and the combined organic extracts were washed with  $\text{H}_2\text{O}$  ( $2 \times 20$  mL) and brine (20 mL), and then dried over  $\text{MgSO}_4$ . Purification of the residue by flash column chromatography using 15% EtOAc/hexanes afforded 100 mg of the product as a clear oil (0.342 mmol, 77% yield). Analytical data for **13**:  **$^1\text{H}$  NMR** (400 MHz,  $\text{CDCl}_3$ ): *major diastereomer*:  $\delta$  7.37 (br s, 5H), 5.75-5.48 (m, 1H), 5.23 (d,  $J = 12$  Hz, 1H), 5.17 (d,  $J = 12$  Hz, 1H), 5.05-4.98 (m, 2H), 3.83 (dd,  $J = 10.8, 1.6$  Hz, 1H), 3.49 (s, 1H), 2.49-2.40 (m, 2H), 2.13 (d,  $J = 10.8$  Hz, 1H), 1.78-1.55 (m, 1H), 1.50-1.39 (m, 1H), 1.37-1.28 (m, 1H), 0.95-0.85 (m, 6H); *resolved signals for the minor diastereomer*:  $\delta$  3.71 (dd,  $J = 11.2, 2.8$  Hz, 1H), 3.49 (s, 1H), 2.12 (d,  $J = 11.2$  Hz, 1H), 1.01 (d,  $J = 7.2$  Hz, 3H); **TLC** (15% EtOAc/hexanes),  $R_f$  0.44 (CAM)

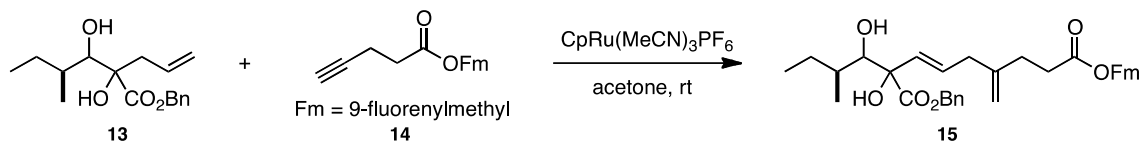

**(E)-9-(9-fluorenylmethyl) 1-benzyl 2-hydroxy-2-((2S)-1-hydroxy-2-methylbutyl)-6-methylenenon-3-enedioate (15)**. A vial was charged with cyclopentadienylruthenium (tris-acetonitrile) hexafluorophosphate (3 mg, 0.0075 mmol, 0.10 equiv) and a stir bar. A solution of **13** (22 mg, 0.075 mmol, 1.0 equiv) and (9-fluorenylmethyl) 4-pentynoate **14** (21 mg, 0.075 mmol, 1.0 equiv) in 0.80 mL acetone was added and the reaction mixture was stirred overnight (~18 h), and then poured into  $\text{H}_2\text{O}$  (10 mL). The cloudy mixture was extracted with  $\text{Et}_2\text{O}$  ( $3 \times 5$  mL), and the combined organic extracts were washed with brine (10 mL) and dried over  $\text{MgSO}_4$ . Purification of the residue by flash column chromatography using 15% EtOAc/hexanes as eluent afforded 22 mg of the product as a clear oil (0.0387 mmol, 52% yield). Analytical data for **15**:  **$^1\text{H}$  NMR** (400 MHz,  $\text{CDCl}_3$ ): *major diastereomer*:  $\delta$  7.77 (d,  $J = 7.6$  Hz, 2H), 7.59 (d,  $J = 7.6$  Hz, 2H), 7.45-7.28 (m, 9H), 6.05-5.95 (m, 1H), 5.58 (d,  $J = 15.2$  Hz, 1H), 5.28 (d,  $J = 9$  Hz, 1H),



5.22 (d,  $J = 9$  Hz, 1H), 4.75 (s, 1H), 4.73 (s, 1H), 4.39 (d,  $J = 7.2$  Hz, 2H), 4.20 (t,  $J = 7.2$  Hz, 1H), 3.98 (m, 1H), 3.62 (s, 1H), 2.76 (m, 2H), 2.51 (t,  $J = 7.2$  Hz, 2H), 2.30 (t,  $J = 7.2$  Hz, 2H), 2.10 (d,  $J = 10.2$  Hz, 1H), 1.78-1.55 (m, 1H), 1.50-1.39 (m, 1H), 1.37-1.28 (m, 1H), 0.95-0.85 (m, 6H); *resolved signals for the minor diastereomer*:  $\delta$  7.53 (d,  $J = 7.6$  Hz, 2H), 3.85 (m, 1H), 3.66 (s, 1H), 0.95 (d,  $J = 6.8$  Hz, 3H) **TLC** (20% EtOAc/hexanes)  $R_f$  0.29 (CAM).

### Synthesis of dithiane aldehyde 16ba:

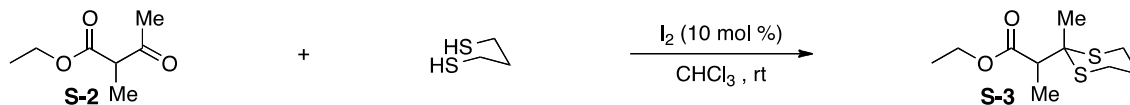

**Ethyl 2-(2-methyl-1,3-dithian-2-yl)propanoate (S-3).** This procedure was conducted analogously to a literature procedure [23]. To a solution of ethyl 2-methylacetoacetate (**S-2**) [24] (5 g, 34.68 mmol, 1 equiv) and 1,3-propanedithiol (4.2 mL, 4.5 g, 41.6 mmol, 1.2 equiv) in chloroform (125 mL) was added iodine (880 mg, 3.47 mmol, 0.1 equiv), and the resultant deep red solution was stirred at room temperature overnight without the need for an  $N_2$  atmosphere (12 h). The reaction was worked up by pouring into 10% aq (w/w) KOH (75 mL) and sat. aq  $Na_2S_2O_3$  (75 mL) and shaking vigorously until the  $I_2$  color had dissipated. The layers were separated, and the aqueous layer was extracted with additional chloroform ( $2 \times 10$  mL). The combined organic extracts were washed with  $H_2O$  (20 mL) and brine (20 mL), dried over  $Na_2SO_4$  and concentrated *in vacuo*. The crude yellow oil obtained (8 g, 34.1 mmol, 98% crude yield) required no further purification. Analytical data for **S-3**: **IR** (thin film,  $cm^{-1}$ ): 2977, 2935, 2904, 2830, 1731, 1641, 1446, 1423, 1372, 1335, 1254, 1184, 1111, 1070, 1043, 1020, 906, 866;  **$^1H$  NMR** (600 MHz,  $CDCl_3$ ):  $\delta$  4.22-4.08 (m, 2H), 3.35 (q,  $J = 7.2$  Hz, 1H), 3.20-3.10 (m, 1H), 3.0-2.90 (m, 1H), 2.68-2.60 (m, 2H), 2.10-2.03 (m, 1H), 1.80-1.70 (m, 1H), 1.59 (s, 3H), 1.29 (d,  $J = 7.2$  Hz, 3H), 1.26 (t,  $J = 7.2$  Hz, 3H);  **$^{13}C$  NMR** (150 MHz,  $CDCl_3$ ):  $\delta$  173.2, 60.4, 49.2, 45.6, 26.5, 26.4, 24.5, 23.1, 14.1, 13.5; **TLC** (20 % EtOAc/hexanes)  $R_f$  0.47 (UV/CAM); **LRMS** (ESI): Calcd. for  $C_{10}H_{18}O_2S_2+Na$ : 257.06; Found: 257.09.

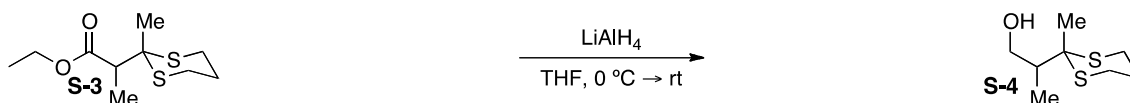

**2-(2-Methyl-1,3-dithian-2-yl)propan-1-ol (S-4).** To a solution of dithiane ester **S-3** (5.7 g, 24 mmol, 1 equiv) in dry THF (100 mL) under  $N_2$  at 0 °C was added a solution of lithium aluminum hydride (1 M in THF, 18 mL, 18 mmol, 0.75 equiv). The reaction mixture was allowed to warm to room temperature, and upon completion, the solution was cooled again to 0 °C. A sat. aq solution of Rochelle's salt (Na/K tartrate) was added carefully until the mixture no longer effervesced. Once the reaction mixture was thus quenched, additional Rochelle's salt solution (~200 mL) was added and the mixture was stirred vigorously until the two layers cleanly separated when stirring was stopped (1–2 h). The aqueous layer was extracted with  $Et_2O$  ( $3 \times 50$  mL), and the combined organic extracts were washed with  $H_2O$  (50 mL) and brine (50 mL), dried over  $MgSO_4$ , and concentrated *in vacuo*. The material thus obtained required no further purification, and its spectral properties matched those reported in the literature [25].

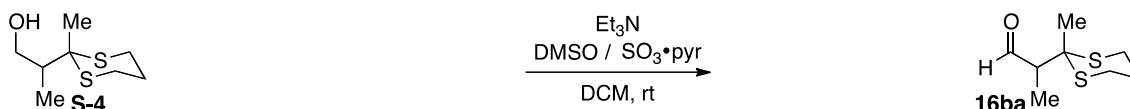

**2-(2-methyl-1,3-dithian-2-yl)propanal (16ba).** This reaction has been reported in a footnote, but no experimental details were given in the text or supporting information [26]. To a solution



of alcohol **S-4** (1 g, 5.2 mmol, 1 equiv) in DCM (20 mL) were added dimethylsulfoxide (3.6 mL, 3.94 g, 50.4 mmol, 9.7 equiv), triethylamine (7.25 mL, 5.26 g, 52 mmol, 10.4 equiv), and the sulfur trioxide·pyridine complex (4.3 g, 27 mmol, 5.2 equiv). The reaction mixture was stirred 1 h at room temperature, and then the mixture was poured into H<sub>2</sub>O (150 mL). The layers were shaken and separated, and the aqueous layer was extracted with DCM (3 × 20 mL). The combined organic extracts were washed with H<sub>2</sub>O (2 × 30 mL) and brine (30 mL), dried over Na<sub>2</sub>SO<sub>4</sub>, and concentrated in vacuo. The residue was purified by flash column chromatography using 20% Et<sub>2</sub>O/hexanes to afford 660 mg (66% yield) of the product **32cb** as a colorless oil. Analytical data for **32cb**: IR (thin film, cm<sup>-1</sup>): 2973, 2934, 2907, 2830, 2731, 1715, 1446, 1422, 1375, 1277, 1239, 1135, 1110, 1077, 906; <sup>1</sup>H NMR (600 MHz, CDCl<sub>3</sub>): δ 9.81 (d, *J* = 3.6 Hz, 1H), 3.03-2.98 (m, 1H), 2.97-2.90 (m, 1H), 2.89-2.85 (m, 1H), 2.80-2.70 (m, 2H), 2.10-2.00 (m, 1H), 1.97-1.89 (m, 1H), 1.59 (s, 3H), 1.20 (d, *J* = 7.2 Hz, 3H); <sup>13</sup>C NMR (150 MHz, CDCl<sub>3</sub>): δ 201.3, 51.1, 48.5, 26.3, 25.7, 24.4, 24.3, 10.5; TLC (10% EtOAc/hexanes) R<sub>f</sub> 0.20 (UV/CAM); LRMS (ESI): Calcd. for C<sub>8</sub>H<sub>14</sub>OS<sub>2</sub>+Na: 213.04, Found: 213.05

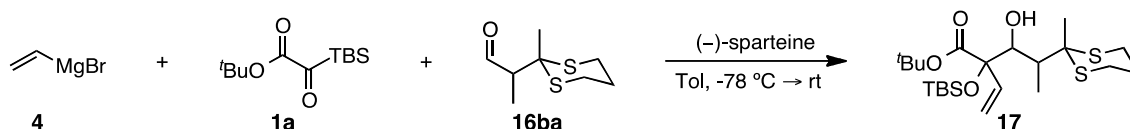

**tert-butyl 2-(tert-butyldimethylsilyloxy)-3-hydroxy-4-(2-methyl-1,3-dithian-2-yl)-2-vinylpentanoate (17).** The title compound was prepared according to General Procedure A using vinylmagnesium bromide (0.7 M in THF, 4.3 mL, 3 mmol), *t*-Bu/TBS silyl glyoxylate **16a** (489 mg, 2 mmol, 1.0 equiv), dithiane aldehyde **32cb** (571 mg, 3 mmol, 1.5 equiv), and (–)-sparteine (703 mg, 3 mmol, 1.5 equiv). The total volume of the (–)-sparteine/Grignard solution was 20 mL dry toluene, and the silyl glyoxylate/aldehyde solution was 40 mL. Analysis of the crude <sup>1</sup>H NMR indicated formation of a single diastereomer, which was purified and isolated by flash column chromatography using 2.5% Et<sub>2</sub>O/hexanes to afford **35a** 590 mg (1.28 mmol, 64% yield) as a white solid. Analytical data for **35a**: IR (thin film, cm<sup>-1</sup>): 3573, 2930, 2903, 2857, 1746, 1640, 1472, 1393, 1369, 1253, 1157, 995, 917, 842; <sup>1</sup>H NMR (600 MHz, CDCl<sub>3</sub>): δ 6.00 (dd, *J* = 17.4, 10.8 Hz, 1H), 5.52 (d, *J* = 17.4, 1H), 5.27 (d, *J* = 10.8 Hz, 1H), 4.59 (d, *J* = 10.8 Hz, 1H), 2.85-2.80 (m, 1H), 2.75-2.65 (m, 3H), 2.44 (q, *J* = 7.2 Hz, 1H), 2.29 (d, *J* = 10.8 Hz, 1H), 1.95-1.85 (m, 2 H), 1.54 (s, 3H), 1.50 (s, 9H), 0.25 (s, 3H) 0.12 (s, 3H); <sup>13</sup>C NMR (150 MHz, CDCl<sub>3</sub>): δ 171.2, 138.1, 116.5, 85.9, 82.3, 74.4, 54.3, 38.5, 28.0, 26.8, 26.4, 26.3, 25.0, 23.9, 19.4, 9.5, –1.9, –2.1 (one coincident resonance); TLC (20% EtOAc/hexanes), R<sub>f</sub> 0.53 (UV/CAM); LRMS (ESI): Calcd. for C<sub>22</sub>H<sub>42</sub>O<sub>4</sub>S<sub>2</sub>Si+Na: 485.22, Found: 485.21; Calcd. for C<sub>22</sub>H<sub>42</sub>O<sub>4</sub>S<sub>2</sub>Si+Cs: 595.13, Found: 595.13

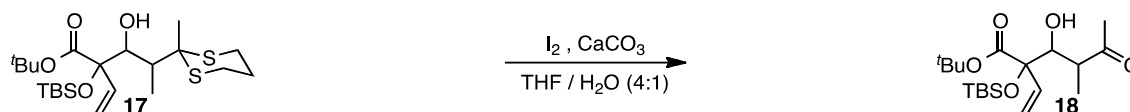

**tert-butyl 2-(tert-butyldimethylsilyloxy)-3-hydroxy-4-methyl-5-oxo-2-vinylhexanoate (18).** Three-component coupling product **17** (149 mg, 0.321 mmol, 1.0 equiv) was dissolved in 4:1 THF:H<sub>2</sub>O (5 mL tot) and the mixture was cooled to 0 °C. Calcium carbonate (32 mg, 0.321 mmol, 1.0 equiv) was added, and 5 min later iodine (244 mg, 0.963 mmol, 3 equiv) was added and the solution became dark red-brown. The reaction was stirred at 0 °C open to air until judged complete by TLC analysis; this was typically checked by NMR analysis of an aliquot because on more than one occasion the reaction was terminated prematurely due to misleading TLC

appearance. When complete, the reaction was worked up by pouring into half-saturated aq  $\text{Na}_2\text{S}_2\text{O}_3$  and shaking vigorously until the  $\text{I}_2$  color had dissipated. The layers were separated, and the aqueous layer was extracted with  $\text{Et}_2\text{O}$  ( $3 \times 10$  mL). The combined organic extracts were washed with  $\text{H}_2\text{O}$  (20 mL) and brine (20 mL), dried over  $\text{MgSO}_4$  and concentrated *in vacuo* to afford the ketone **18** (which typically required no further purification as long as the reaction had gone to completion). An analytical sample was purified using flash column chromatography, eluting with 7.5%  $\text{EtOAc}$ /hexanes to afford 100 mg (0.268 mmol, 83% yield) of the desired product as a white solid. Analytical data for **18**: **IR** (thin film,  $\text{cm}^{-1}$ ): 3485, 2955, 2931, 2856, 1747, 1713, 1460, 1369, 1253, 1161, 1056, 841;  **$^1\text{H}$  NMR** (600 MHz,  $\text{CDCl}_3$ ):  $\delta$  5.78 (dd,  $J = 17.4, 10.8$  Hz, 1H), 5.45 (d,  $J = 17.4$ , 1H), 5.15 (d,  $J = 10.8$  Hz, 1H), 4.31 (dd,  $J = 10.8, 7.8$  Hz, 1H), 2.85 (quint,  $J = 7.2$  Hz, 1H), 2.16 (d,  $J = 10.8$  Hz, 1H), 2.11 (s, 3H), 1.49 (s, 9H), 1.11 (d,  $J = 7.2$  Hz, 3H), 0.95 (s, 9H), 0.22 (s, 3H) 0.16 (s, 3H);  **$^{13}\text{C}$  NMR** (150 MHz,  $\text{CDCl}_3$ ):  $\delta$  211.3, 170.9, 137.3, 116.4, 84.4, 82.7, 47.5, 29.4, 27.9, 26.51, 26.48, 19.4, 13.6, -2.2, -2.6; **TLC** (20%  $\text{EtOAc}$ /hexanes),  $R_f$  0.45 (UV/CAM); **LRMS** (ESI): Calcd. for  $\text{C}_{19}\text{H}_{36}\text{O}_5\text{Si}+\text{Na}$ : 395.22, Found: 395.22; Calcd. for  $\text{C}_{19}\text{H}_{36}\text{O}_5\text{Si}+\text{Cs}$ : 505.14, Found: 505.13

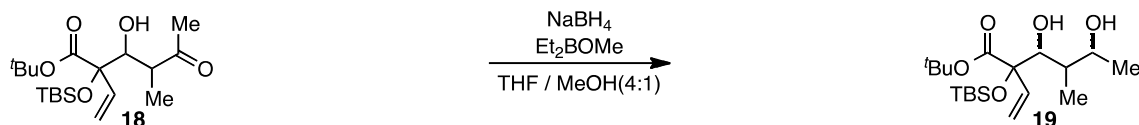

**(3*R*\*,5*R*\*)-tert-butyl 2-(tert-butyldimethylsilyloxy)-3,5-dihydroxy-4-methyl-2-vinylhexanoate (19)**. A solution of **18** in (60 mg, 0.161 mmol) 4:1 THF:MeOH (2 mL) was cooled to  $-78$   $^{\circ}\text{C}$ , a solution of diethylmethoxyborane (1 M in THF, 0.21 mL, 0.21 mmol, 1.3 equiv) was added, and the solution was stirred for 45 min prior to the addition of sodium borohydride (18 mg, 0.483 mmol, 3 equiv). The reaction was moved to a cryocool, set to  $-70$   $^{\circ}\text{C}$ , and stirred at this temperature until judged complete by TLC analysis. The reaction was quenched by pouring into MeOH (10 mL) and carefully adding glacial acetic acid to the mixture, which effervesced. The reaction was concentrated *in vacuo*, redissolved in MeOH, and concentrated again (3 $\times$ ). The crude residue was triturated and filtered with  $\text{Et}_2\text{O}$  and concentrated to a clear oil. The residue was purified by flash column chromatography, using 15%  $\text{EtOAc}$ /hexanes as eluent to afford 50 mg (0.133 mmol, 83% yield) of **19** as a clear colorless oil. Analytical data for **19**: **IR** (thin film,  $\text{cm}^{-1}$ ): 3438, 2974, 2930, 2857, 1747, 1472, 1462, 1370, 1252, 1153, 927, 840, 779;  **$^1\text{H}$  NMR** (600 MHz,  $\text{CDCl}_3$ ):  $\delta$  5.94 (dd,  $J = 17.4, 10.8$  Hz, 1H), 5.42 (d,  $J = 17.4$ , 1H), 5.29 (d,  $J = 10.8$  Hz, 1H), 4.00 (m, 2H), 3.22 (d,  $J = 10.2$  Hz, 1H), 3.04 (br s, 1H), 1.86-1.80 (m, 1H), 1.52 (s, 9H), 1.22 (d,  $J = 6$  Hz, 3H), 0.91 (s, 9H), 0.91 (d,  $J = 7.2$  Hz, 3H), 0.20 (s, 3H) 0.12 (s, 3H);  **$^{13}\text{C}$  NMR** (150 MHz,  $\text{CDCl}_3$ ):  $\delta$  171.8, 138.0, 117.0, 83.2, 82.5, 81.0, 72.3, 38.8, 28.0, 26.3, 20.3, 19.0, 5.9, -2.2, -2.3; **TLC** (20%  $\text{EtOAc}$ /hexanes),  $R_f$  0.26 (CAM); **LRMS** (ESI): Calcd. for  $\text{C}_{19}\text{H}_{38}\text{O}_5\text{Si}+\text{Na}$ : 397.24, Found: 397.23; Calcd. for  $\text{C}_{19}\text{H}_{38}\text{O}_5\text{Si}+\text{Cs}$ : 507.15, Found: 507.15

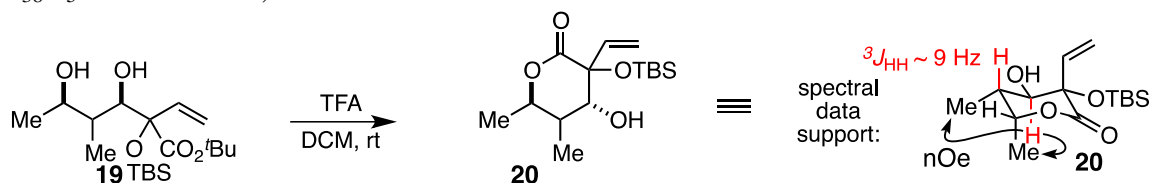

**(4*R*,6*R*)-3-(tert-butyldimethylsilyloxy)-4-hydroxy-5,6-dimethyl-3-vinyltetrahydro-2*H*-pyran-2-one (20)**. To a solution of **19** (30 mg, 0.800 mmol, 1 equiv) in DCM (0.67 mL) was added trifluoroacetic acid (0.33 mL). The reaction was stirred at room temperature until TLC analysis indicated consumption of the starting material **20**. The reaction was concentrated *in*

*vacuo*, redissolved in CHCl<sub>3</sub>, and concentrated again (repeated twice more to remove the TFA). The residue was purified via flash column chromatography using 10% EtOAc/hexanes to afford 10 mg (0.033 mmol, 41% yield) of **20** as a clear oil. Analytical data for **20**: **IR** (thin film, cm<sup>-1</sup>): 3461, 2929, 2856, 2359, 1747, 1633, 1463, 1250, 1159, 1056, 839, 781; **<sup>1</sup>H NMR** (600 MHz, CDCl<sub>3</sub>): δ 6.12 (dd, *J* = 17.4, 10.8 Hz, 1H), 5.42 (d, *J* = 10.8, 1H), 5.38 (d, *J* = 17.4 Hz, 1H), 4.69 (quint, *J* = 6.6 Hz, 1H), 3.74 (d, *J* = 10.2 Hz, 1H), 2.24-2.19 (m, 1H), 2.19 (s, 1H), 1.30 (d, *J* = 6.6 Hz, 3H), 1.08 (d, *J* = 7.2 Hz, 3H), 0.91 (s, 9H), 0.18 (s, 3H) 0.16 (s, 3H); **<sup>13</sup>C NMR** (150 MHz, CDCl<sub>3</sub>): δ 172.0, 134.2, 119.8, 81.2, 76.5, 35.6, 26.0, 18.6, 17.2, 13.2, -2.8, -3.0 (one coincident resonance); **TLC** (10% EtOAc/hexanes), *R<sub>f</sub>* 0.11 (CAM); **LRMS** (ESI): Calcd. for C<sub>15</sub>H<sub>28</sub>O<sub>4</sub>Si+Na: 323.17, Found: 323.16

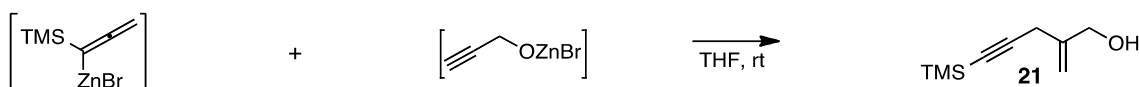

**2-methylene-5-(trimethylsilyl)pent-4-yn-1-ol (21).** This procedure is based on a literature precedent for which a detailed procedure is lacking [27]. The allenylzinc reagent was generated from trimethylsilyl propargyl bromide [28] as follows: to a suspension of Zn<sup>0</sup> (6.29 g, 96 mmol, 2.0 equiv) in dry THF (100mL) under N<sub>2</sub> was slowly added Br<sub>2</sub> (0.49 mL, 1.53 g, 9.6 mmol, 10 mol % relative to Zn<sup>0</sup>) to activate the metal surface. The suspension was heated under reflux for 15 min and then cooled to room temperature, at which point the TMS propargyl bromide (9.2 g, 48 mmol, 1.0 equiv) was added dropwise. The mixture was stirred overnight (12 h) under N<sub>2</sub>, and then stirring was stopped to allow the excess Zn<sup>0</sup> to settle. The solution was titrated with I<sub>2</sub> [29], and the amount of active allenylzinc was calculated: in this case, it was 29.6 mmol active reagent (62% yield; typically approx. 60% yield of active reagent was observed over several runs). Based on the calculation, 1.0 equiv of propargyl alcohol (1.72 mL, 1.66 g, 29.6 mmol) was added to a separate dry flask containing THF 60 mL, which was cooled to -78 °C. A solution of *n*-butyllithium (1.5 M in hexanes, 21.7 mL, 32.5 mmol, 1.1 equiv) was added, and the solution is warmed to room temperature for 30 min, after which it was cooled again to -78 °C. A solution of ZnBr<sub>2</sub> (7.33 g, 32.5 mmol, 1.1 equiv) in THF (40 mL) was transferred to the lithium alkoxide, which was warmed again to room temperature for 30 min. The allenylzinc solution was transferred to the solution of zinc alkoxide via cannula, and the reaction was stirred overnight (12 h). The reaction was quenched with a solution of NH<sub>4</sub>Cl (50 mL), and diluted with H<sub>2</sub>O (500 mL). The layers are separated, and the aqueous layer was extracted with Et<sub>2</sub>O (3 × 75 mL). The combined organic extracts were washed with brine (50 mL), dried over MgSO<sub>4</sub>, and concentrated *in vacuo*. The crude residue was purified by flash column chromatography using 10% EtOAc/hexanes to afford 2.64 g (15.7 mmol, 53% yield) of the product **21** as a colorless oil (reported: 80% yield; best run in our hands: 72% yield). **21** is a known compound, but its <sup>1</sup>H NMR has not been reported in CDCl<sub>3</sub> before: **<sup>1</sup>H NMR** (CDCl<sub>3</sub>, 300 MHz): δ 5.21 (s, 1H), 5.15 (s, 1H), 4.15 (d, *J* = 6.3 Hz, 2H), 3.06 (s, 2H), 1.50 (d, *J* = 6.3 Hz, 1H), 0.17 (s, 9H); **TLC** (20% EtOAc/hexanes) 0.28 (KMnO<sub>4</sub>/CAM).

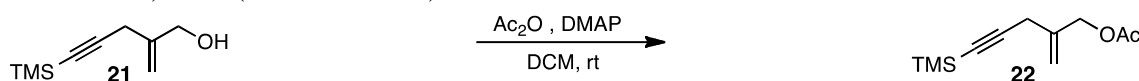

**2-methylene-5-(trimethylsilyl)pent-4-yn-1-yl acetate (22).** To a solution of **21** (185 mg, 1.1 mmol, 1.0 equiv), *N,N*-dimethylaminopyridine (27 mg, 0.22 mmol, 0.20 equiv), and triethylamine (278 mg, 2.75 mmol, 2.5 equiv) at 0 °C in DCM (12 mL) was added acetic anhydride (224 mg, 2.2 mmol, 2 equiv) neat, dropwise. Dry solvent and N<sub>2</sub> atmosphere were not

necessary. The solution was stirred until TLC analysis indicated consumption of **21** ( $\leq 1$  h), at which point the solution was carefully concentrated *in vacuo*. The crude oil was purified via flash column chromatography, eluting with 10% Et<sub>2</sub>O/pentanes to afford 220 mg (1.045 mmol, 95% yield) of **22** as a clear, colorless oil. Analytical data for **22**: **IR** (thin film, cm<sup>-1</sup>): 3090, 2960, 2899, 2179, 1744, 1658, 1419, 1373, 1249, 1233, 1030, 913, 844, 761; **<sup>1</sup>H NMR** (400 MHz, CDCl<sub>3</sub>):  $\delta$  (5.32 (s, 1H), 5.18 (s, 1H), 4.58 (s, 2H), 3.03 (s, 2H), 2.08 (s, 3H), 0.16 (s, 9H); **<sup>13</sup>C NMR** (100 MHz, CDCl<sub>3</sub>):  $\delta$  170.6, 138.5, 114.9, 102.4, 87.9, 66.3, 24.5, 20.9, 0.01; **TLC** (20% EtOAc/hexanes), *R<sub>f</sub>* 0.62 (KMnO<sub>4</sub>/CAM); **LRMS** (ESI): Calcd. for C<sub>11</sub>H<sub>18</sub>O<sub>2</sub>Si+Na: 233.16 Found: 233.10.

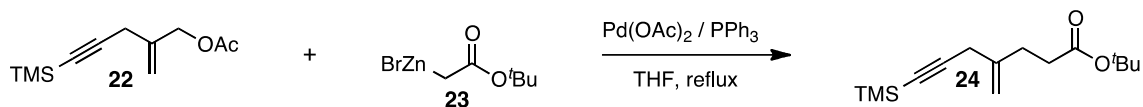

**tert-butyl 4-methylene-7-(trimethylsilyl)hept-6-ynoate (24).** To a suspension of Zn<sup>0</sup> (3.92 g, 60 mmol, 2 equiv) in THF (60 mL) under N<sub>2</sub> was added Br<sub>2</sub> (0.31 mL, 0.967 g, 6 mmol, 0.1 equiv relative to Zn<sup>0</sup>) to activate the metal surface. The suspension was heated under reflux, and *tert*-butyl bromoacetate (4.43 mL, 5.85g, 30 mmol, 1 equiv) was added slowly over 15 min via syringe pump. The reaction mixture was heated under reflux for 1 h, and then heating and stirring were stopped to allow the solution to cool and the excess Zn<sup>0</sup> to settle. The Reformatsky reagent **23** thus generated was titrated with I<sub>2</sub> [29]; on this occasion, it was 0.45 M (90% yield of active reagent; this was typical). In a separate flask, palladium acetate (107 mg, 0.475 mmol, 0.05 equiv), triphenylphosphine (249 mg, 0.95 mmol, 0.10 equiv), and the allylic acetate **22** (2 g, 9.5 mmol, 1.0 equiv) were mixed in THF (60 mL). To this mixture was added the Reformatsky reagent (31.7 mL, 14.3 mmol, 1.5 equiv), and the resulting solution was heated under reflux overnight (12 h). TLC analysis indicated consumption of the acetate **22**, and the reaction was quenched with sat. aq NH<sub>4</sub>Cl (50 mL) and diluted with H<sub>2</sub>O (250 mL). The layers were shaken and separated, and the aqueous layer was extracted with Et<sub>2</sub>O (3  $\times$  50 mL). The combined organic extracts were washed with H<sub>2</sub>O (50 mL) and brine (50 mL), dried over MgSO<sub>4</sub>, and concentrated *in vacuo*. Purification of the residue by flash column chromatography using 2.5% EtOAc/hexanes afforded 2.1 g (7.88 mmol, 83% yield) of **24** as a clear, slightly pale yellow oil. Analytical data for **24**: **IR** (thin film, cm<sup>-1</sup>): 3084, 2963, 2900, 2177, 1732, 1652, 1367, 1251, 1148, 1033, 900, 844, 760; **<sup>1</sup>H NMR** (600 MHz, CDCl<sub>3</sub>):  $\delta$  5.10 (s, 1H), 4.85 (s, 1H), 2.97 (s, 2H), 2.40-2.35 (m, 4H), 1.43 (s, 9H), 0.15 (s, 9H); **<sup>13</sup>C NMR** (150 MHz, CDCl<sub>3</sub>):  $\delta$  172.3, 142.5, 111.3, 103.6, 87.3, 80.3, 33.7, 30.7, 28.1, 27.3, 0.0; **TLC** (5% EtOAc/hexanes), *R<sub>f</sub>* 0.41 (KMnO<sub>4</sub>/CAM); **LRMS** (ESI): Calcd. for C<sub>15</sub>H<sub>26</sub>O<sub>2</sub>Si+Na: 289.16 Found: 289.17.

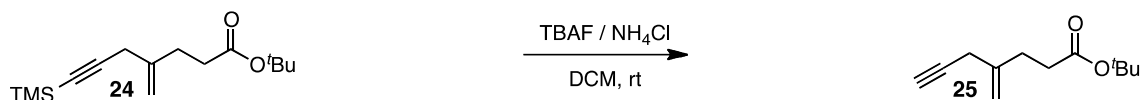

**tert-butyl 4-methylenehept-6-ynoate (25).** To a solution of protected alkyne **24** (138 mg, 0.518 mmol, 1.0 equiv) in DCM (10 mL) was added NH<sub>4</sub>Cl (138 mg, 2.6 mmol, 5 equiv), to make a fine suspension. To this mixture was added tetrabutylammonium fluoride (1 M in THF, 1.55 mL, 1.55 mmol, 3 equiv), and the reaction was monitored by removal of aliquots for NMR analysis. Upon completion, the reaction mixture was filtered and carefully concentrated *in vacuo*. The crude oil was purified by flash column chromatography using 5% Et<sub>2</sub>O/pentanes to afford 95 mg (0.489 mmol, 95% yield) of the free alkyne **25** as a clear, pale yellow oil. Similar results were obtained on a larger scale (approx. 2 g). Analytical data for **25**: **IR** (thin film, cm<sup>-1</sup>): 3086, 2979, 2931, 2121, 1730, 1654, 1368, 1255, 1148, 901, 847; **<sup>1</sup>H NMR** (400 MHz, CDCl<sub>3</sub>):  $\delta$  5.10 (s,

1H), 4.85 (s, 1H), 2.92 (br s, 2H), 2.40-2.35 (m, 4H), 2.11 (t,  $J = 2.4$  Hz, 1H), 1.42 (s, 9H);  $^{13}\text{C}$  NMR (100 MHz,  $\text{CDCl}_3$ ):  $\delta$  172.2, 142.3, 111.4, 81.1, 80.3, 70.8, 33.6, 30.6, 28.1, 25.9; TLC (10% EtOAc/hexanes),  $R_f$  0.50 ( $\text{KMnO}_4/\text{CAM}$ ); LRMS (ESI): Calcd. for  $\text{C}_{12}\text{H}_{18}\text{O}_2 + \text{Na}$ : 217.12 Found: 217.13.

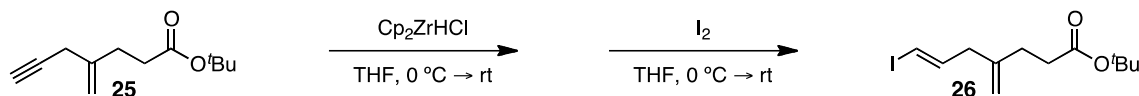

**(E)-tert-butyl 7-iodo-4-methylenehept-6-enoate (26).** To a suspension of zirconocene hydrochloride (520 mg, 2 mmol, 1.4 equiv) in THF (10 mL) under  $\text{N}_2$  at 0 °C was added a solution of the free alkyne **25** (280 mg, 1.44 mmol, 1 equiv) in THF (1.5 mL). The suspension was warmed to room temperature and stirred for 30 min past the point when the suspension had cleared (approx. 1.5 h total), at which point the solution was cooled once again to 0 °C. A solution of iodine (585 mg, 2.3 mmol, 1.6 equiv) in THF (5 mL) was added to the reaction mixture, and the reddish color eventually persisted. The reaction was stirred for 30 min then poured into 100 mL of 1:1 sat. aq  $\text{NaHCO}_3$ : sat. aq  $\text{Na}_2\text{S}_2\text{O}_3$ , and stirred vigorously until the  $\text{I}_2$  color had dissipated. The layers were separated, and the aqueous layer was extracted with  $\text{Et}_2\text{O}$  ( $3 \times 25$  mL). The combined organic extracts were washed with  $\text{H}_2\text{O}$  (20 mL) and brine (20 mL), dried over  $\text{MgSO}_4$ , and concentrated *in vacuo*. The residue was purified by flash column chromatography using 5% EtOAc/hexanes to afford 400 mg (1.24 mmol, 86% yield) of the vinyl iodide **26** as a clear, pale yellow oil. Analytical data for **26**: IR (thin film,  $\text{cm}^{-1}$ ): 3080, 3050, 2978, 2930, 1730, 1649, 1604, 1434, 1391, 1367, 1252, 1150, 953, 898, 845;  $^1\text{H}$  NMR (400 MHz,  $\text{CDCl}_3$ ):  $\delta$  6.50 (m, 1H), 6.07 (d,  $J = 14.4$  Hz, 1H), 4.80 (s, 2H), 2.75 (d,  $J = 6.8$  Hz), 2.35 (m, 2H), 2.28 (d,  $J = 7.2$  Hz, 2H), 1.43 (s, 9H);  $^{13}\text{C}$  NMR (100 MHz,  $\text{CDCl}_3$ ):  $\delta$  172.3, 144.9, 143.5, 111.3, 80.4, 76.4, 42.8, 33.6, 30.8, 28.1; TLC (5% EtOAc/hexanes),  $R_f$  0.53 (UV/CAM); LRMS (ESI): Calcd. for  $\text{C}_{12}\text{H}_{19}\text{IO}_2 + \text{Na}$ : 345.03 Found: 345.04

### General procedure B: Three component coupling reactions with substituted vinyl nucleophiles generated by Mg/I exchange

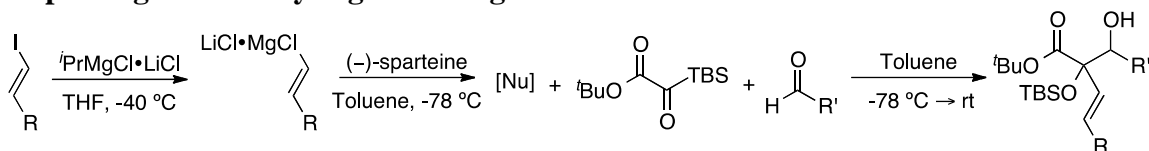

The procedure for the generation of the nucleophile was analogous to the literature procedure [30]. It was used for all of the reactions in **Scheme S-7**, although full details for these will not be reported here. To a solution of the vinyl iodide (1.5 equiv) in a minimal amount of dry THF ( $\leq 0.20$  mL) cooled to  $-78$  °C under  $\text{N}_2$  was added a solution of  $i\text{PrMgCl} \cdot \text{LiCl}$  (1.65 equiv), and the reaction was stirred overnight (12 h) in a cryocool set to  $-40$  °C. The solution of the vinyl nucleophile thus generated was cooled to  $-78$  °C, a solution of  $(-)$ -sparteine (1.5 equiv) in toluene was added, and the solution was stirred at  $-78$  °C. Meanwhile, a separate solution of the silyl glyoxylate **1a** (1.0 equiv) and the aldehyde (**3** or **16**; 1.5 equiv) in dry toluene was prepared and cooled to  $-78$  °C for 15 min. The nucleophile/sparteine solution was transferred to the silyl glyoxylate/aldehyde solution via cannula, and the reaction mixture was stirred at  $-78$  °C for an additional 15 min followed by warming to room temperature for 1.5 h. The reaction was quenched with 10% (v/v) aq AcOH and diluted with  $\text{H}_2\text{O}$ . The layers were separated, and the aqueous layer was extracted with  $\text{Et}_2\text{O}$  ( $3 \times$ ). The combined organic extracts were washed with

H<sub>2</sub>O and brine, dried over MgSO<sub>4</sub>, and concentrated in vacuo. The residue was purified by flash column chromatography using the indicated eluent system.

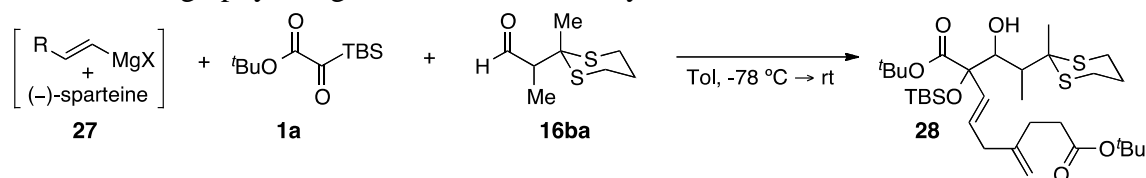

**(E)-di-tert-butyl 2-(tert-butyldimethylsilyloxy)-2-(1-hydroxy-2-(2-methyl-1,3-dithian-2-yl)propyl)-6-methylenenon-3-enedioate (35e)**. The title compound was prepared according to General Procedure B using **36'** (74 mg, 0.230 mmol, 1.5 equiv) in THF (0.200 mL), and *i*PrMgCl·LiCl (1.3 M in THF, 0.19 mL, 0.253 mmol, 1.65 equiv). After overnight nucleophile generation, (–)-sparteine (54 mg, 0.230 mmol, 1.5 equiv) in toluene (1 mL) was used to complex the Grignard. The silyl glyoxylate **16a** (37 mg, 0.153 mmol, 1.0 equiv) and dithiane aldehyde **32cb** (44 mg, 0.230 mmol, 1.5 equiv) solution was prepared in toluene (3 mL). Purification was effected using 2.5% Et<sub>2</sub>O/hexanes to afford 53 mg (0.0840 mmol, 55% yield) of the desired product as a clear oil. Analytical data for **35e**: <sup>1</sup>H NMR (600 MHz, CDCl<sub>3</sub>): δ 5.90 (m, 1H), 5.62 (d, *J* = 15.6 Hz, 1H), 4.77 (s, 1H), 4.75 (s, 1H), 4.55 (d, *J* = 10.8 Hz, 1H), 2.78 (d, *J* = 8.4 Hz, 1H), 2.80–2.65 (m, 4H), 2.47 (q, *J* = 7.2 Hz, 1H), 2.37–2.30 (m, 3H), 2.30–2.25 (m, 2H), 1.95–1.85 (m, 2H), 1.53 (s, 3H), 1.49 (s, 9H), 1.43 (s, 9H), 1.13 (d, *J* = 7.2 Hz, 3H), 0.93 (s, 9H), 0.23 (s, 3H), 0.11 (s, 3H); <sup>13</sup>C NMR (150 MHz, CDCl<sub>3</sub>): δ 172.3, 171.5, 146.3, 131.9, 129.6, 110.5, 85.1, 82.3, 80.2, 74.7, 54.3, 39.4, 33.7, 31.2, 28.1, 28.0, 26.8, 26.3, 26.2, 25.7, 24.9, 23.9, 19.3, 9.5, –1.99, –2.00; TLC (5% EtOAc/hexanes) *R*<sub>f</sub> 0.18 (UV/CAM); LRMS (ESI): Calcd. for C<sub>32</sub>H<sub>58</sub>O<sub>6</sub>S<sub>2</sub>Si+Na: 653.33, Found: 653.33; Calcd. for C<sub>32</sub>H<sub>58</sub>O<sub>6</sub>S<sub>2</sub>Si+Cs: 763.25, Found: 763.24.

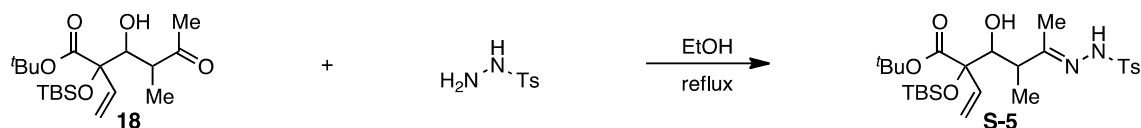

**(E)-tert-butyl 2-((tert-butyldimethylsilyl)oxy)-3-hydroxy-4-methyl-5-(2-tosylhydrazono)-2-vinylhexanoate (S-5)**. To a solution of ketone **18** (100 mg, 0.268 mmol, 1.0 equiv) in EtOH (5 mL) was added *p*-toluenesulfonylhydrazide (50 mg, 0.268 mmol, 1.0 equiv). The mixture was heated under reflux for 10 min and cooled to room temperature and concentrated *in vacuo*. The residue was purified by flash column chromatography using a 10→20% EtOAc/hexanes gradient to afford 123 mg (0.227 mmol, 85% yield) of the tosylhydrazone **S-5** as a white foam. Analytical data for **S-5**: IR (thin film, cm<sup>–1</sup>): 3327, 2956, 2930, 2856, 2253, 1744, 1708, 1640, 1460, 1369, 1252, 1166, 916, 840; <sup>1</sup>H NMR (600 MHz, CDCl<sub>3</sub>): δ 7.83 (d, *J* = 8.4 Hz, 1H), 7.29 (d, *J* = 8.4 Hz, 1H), 5.54 (dd, *J* = 17.4, 11.4 Hz, 1H), 5.22 (d, *J* = 17.4, 1H), 4.90 (d, *J* = 11.4, 1H), 4.04 (d, *J* = 7.2 Hz, 1H), 2.64 (app quint, *J* = 7.2 Hz, 1H), 2.41 (s, 3H), 1.67 (s, 3H), 1.47 (s, 9H), 1.01 (d, *J* = 6.6 Hz, 3H), 0.91 (s, 9H), 0.18 (s, 3H), 0.10 (s, 3H); <sup>13</sup>C NMR (150 MHz, CDCl<sub>3</sub>): δ 170.9, 160.7, 143.8, 137.7, 135.6, 129.4, 128.1, 114.9, 84.3, 82.5, 76.7, 42.8, 27.9, 26.4, 21.6, 19.3, 15.1, 14.6, –2.3, –2.6; TLC (20% EtOAc/hexanes), *R*<sub>f</sub> 0.21 (UV/CAM).

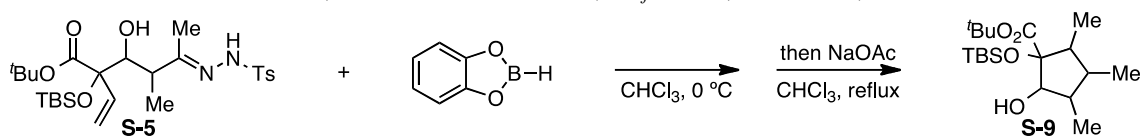

**tert-butyl 1-(tert-butyldimethylsilyloxy)-2-hydroxy-3,4,5-trimethylcyclopentane-1-carboxylate (S-9)**. This reaction was performed analogously to a literature procedure. To a solution of **S-5** (12 mg, 0.0222 mmol, 1.0 equiv) in dry CHCl<sub>3</sub> (3 mL) under N<sub>2</sub> at 0 °C was

added a solution of catecholborane (1M in THF, 0.05 mL, 0.05 mmol, 2.3 equiv). The mixture was stirred at 0 °C until TLC analysis indicated consumption of **S-5**, at which point NaOAc·3H<sub>2</sub>O (21 mg, 0.153 mmol, 6.9 equiv) was added to the flask, which was affixed with a reflux condenser. The reaction was heated under reflux for 1 h. TLC analysis indicated consumption of the intermediate and formation of the product, and the cloudy reaction mixture was cooled to room temperature. The mixture was filtered through Celite and concentrated *in vacuo*. Purification by flash column chromatography using 2.5% EtOAc/hexanes afforded the product as a mixture of diastereomers. The yield was not determined, but **S-9** was the sole product obtained and none of the desired reduction product **5** was obtained. Preparative HPLC using 2.5% EtOAc/hexanes afforded a single diastereomer, which was characterized as follows: analytical data for **S-9**: **IR** (thin film, cm<sup>-1</sup>): 3458, 2956, 2929, 2856, 2090, 1737, 1696, 1645, 1461, 1369, 1251, 1157, 1048, 839, 779; **<sup>1</sup>H NMR** (600 MHz, CDCl<sub>3</sub>): δ 3.83 (t, *J* = 10.2 Hz, 1H), 2.36-2.30 (m, 1H), 1.66 (d, *J* = 10.2 Hz, 1H), 1.67-1.59 (m, 1H), 1.56-1.45 (m, 1H), 1.47 (s, 9H), 1.09 (d, *J* = 6.6 Hz, 1H), 0.92 (d, *J* = 7.2 Hz, H), 0.92 (s, 9H), 0.84 (d, *J* = 7.2 Hz, 1H), 0.22 (s, 3H) 0.15 (s, 3H); **<sup>13</sup>C NMR** (150 MHz, CDCl<sub>3</sub>): δ 172.9, 87.4, 82.9, 81.4, 47.3, 41.0, 39.2, 28.0, 26.5, 19.6, 16.9, 16.0, 9.5, -2.2, -2.7; **TLC** (5% EtOAc/hexanes), R<sub>f</sub>0.27 (CAM); **LRMS** (ESI): Calcd. for C<sub>19</sub>H<sub>38</sub>O<sub>4</sub>Si+Na: 381.24, Found: 381.24; Calcd. for C<sub>19</sub>H<sub>38</sub>O<sub>4</sub>Si+Cs: 491.16, Found: 491.15.

## References:

- [1] Giampietro, N. C.; Kampf, J. W.; Wolfe, J. P. *J. Am. Chem. Soc.* **2009**, *131*, 12556-12557.
- [2] Greszler, S. N.; Johnson, J. S. *Angew. Chem. Int. Ed.* **2009**, *48*, 3689-3691.
- [3] Kobayashi, Y.; Kitano, Y.; Takeda, Y.; Sato, F. *Tetrahedron* **1986**, *42*, 2937-2943.
- [4] Sato, F.; Kusakabe, M.; Kobayashi, Y. *J. Chem. Soc., Chem. Commun.* **1984**, 1130.
- [5] Sato, F.; Takeda, Y.; Uchiyama, H.; Kobayashi, Y. *J. Chem. Soc., Chem. Commun.* **1984**, 1132.
- [6] Sato, F.; Kusakabe, M.; Kato, T.; Kobayashi, Y. *J. Chem. Soc., Chem. Commun.* **1984**, 1331.
- [7] Tucker, C. E.; Majid, T. N.; Knochel, P. *J. Am. Chem. Soc.* **1992**, *114*, 3983-3985.
- [8] Wipf, P.; Ribe, S. *J. Org. Chem.* **1998**, *63*, 6454-6455.
- [9] Wipf, P.; Xu, W. *Tetrahedron Lett.* **1994**, *35*, 5197-5200.
- [10] Schmitt, D. C.; Johnson, J. S. *Org. Lett.* **2010**, *12*, 944-947.
- [11] Yang, T.-K.; Lee, D.-S.; Haas, J. Raney Nickel. *e-EROS Encyclopedia of Reagents for Organic Synthesis* **2001**.
- [12] Back, T. G.; Baron, D. L.; Yang, K. *J. Org. Chem.* **1993**, *58*, 2407-2413.
- [13] Chan, M. C.; Cheng, K. M.; Ho, K. M.; Ng, C. T.; Yam, T. M.; Wang, B. S. L.; Luh, T. Y. *J. Org. Chem.* **1988**, *53*, 4466-4471.
- [14] Becker, S.; Fort, Y.; Vanderesse, R.; Caubere, P. *Tetrahedron Letters* **1988**, *29*, 2963-2966.
- [15] Becker, S.; Fort, Y.; Caubere, P. *J. Org. Chem.* **1990**, *55*, 6194-6198.
- [16] Kabalka, G. W.; Baker, J. D. *J. Org. Chem.* **1975**, *40*, 1834-1835.
- [17] Anelli, P. L.; Montanari, F.; Quici, S.; Nonoshita, K.; Yamamoto, H. *Org. Synth.* **1990**, *69*, 212.
- [18] Fürstner, A.; Flügge, S.; Larionov, O.; Takahashi, Y.; Kubota, T.; Kobayashi, J. *Chem. Eur. J.* **2009**, *15*, 4011-4029.
- [19] Ghosh, A. K.; Gong, G. *Chem. Asian J.* **2008**, *3*, 1811-1823.
- [20] Saito, T.; Fuwa, H.; Sasaki, M. *Tetrahedron* **2011**, *67*, 429-445.
- [21] Hara, S.; Dojo, H.; Takinami, S.; Suzuki, A. *Tetrahedron Lett.* **1983**, *24*, 731-734.
- [22] Yanagisawa, A.; Habaue, S.; Yamamoto, H. *J. Am. Chem. Soc.* **1989**, *111*, 366-368.
- [23] Firouzabadi, H.; Iranpoor, N.; Hazarkhani, H. *J. Org. Chem.* **2001**, *66*, 7527-7529.
- [24] Stiles, M.; Wolf, D.; Hudson, G. V. *J. Am. Chem. Soc.* **1959**, *81*, 628-632.
- [25] Nickon, A.; Rodriguez, A. D.; Shirhatti, V.; Ganguly, R. *J. Org. Chem.* **1985**, *50*, 4218-4226.
- [26] Kim, H.; Baker, J. B.; Lee, S.-U.; Park, Y.; Bolduc, K. L.; Park, H.-B.; Dickens, M. G.; Lee, D.-S.; Kim, Y.; Kim, S. H.; Hong, J. *J. Am. Chem. Soc.* **2009**, *131*, 3192-3194.
- [27] Renaud, J.-L.; Aubert, C.; Malacria, M. *Tetrahedron Lett.* **1999**, *40*, 5015-5018.
- [28] MacInnes, I.; Walton, J. C. *J. Chem. Soc., Perkin Trans. 2* **1987**, 1077.
- [29] Krasovskiy, A.; Knochel, P. *Synthesis* **2006**, 890-891.
- [30] Ren, H.; Krasovskiy, A.; Knochel, P. *Org. Lett.* **2004**, *6*, 4215-4217.



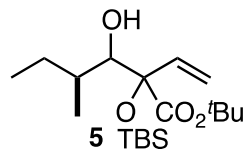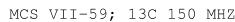

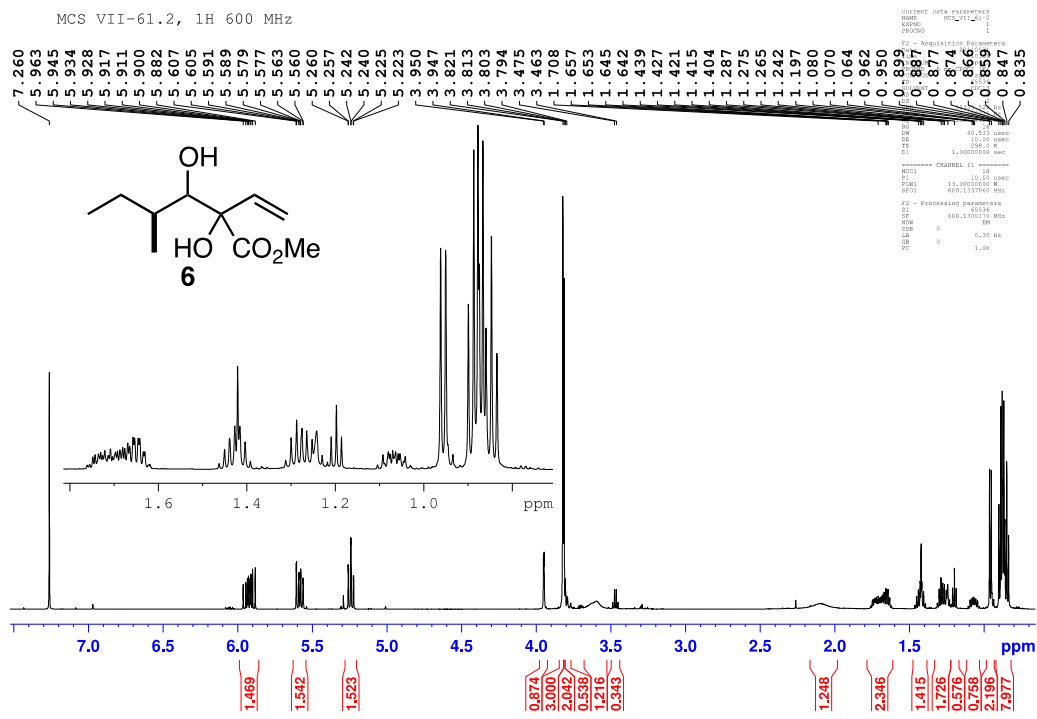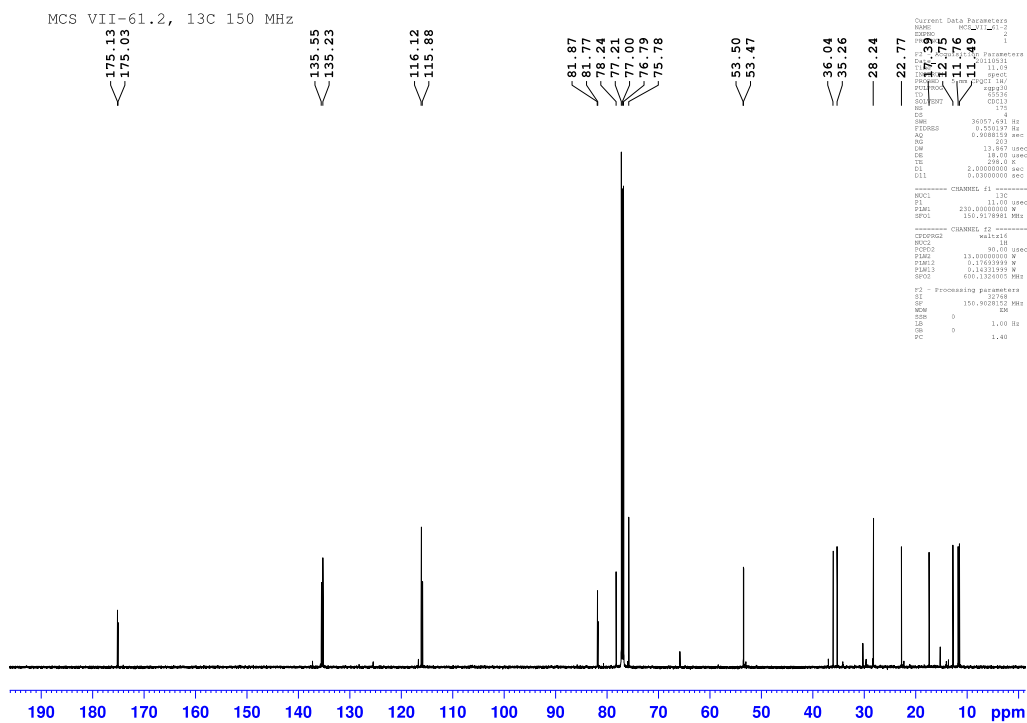

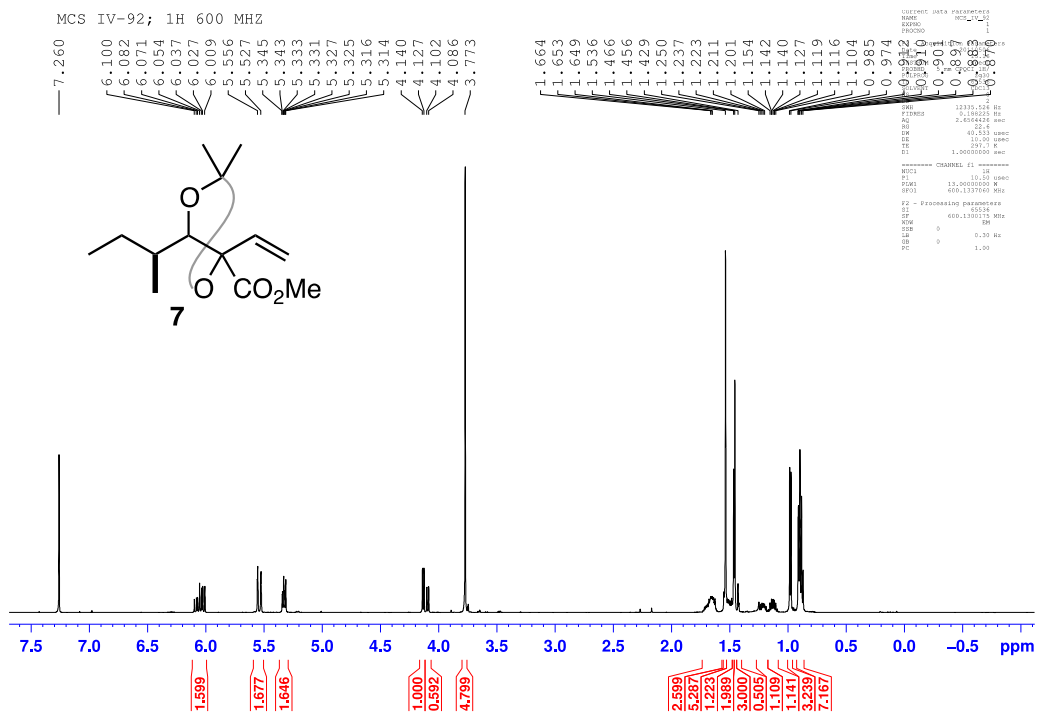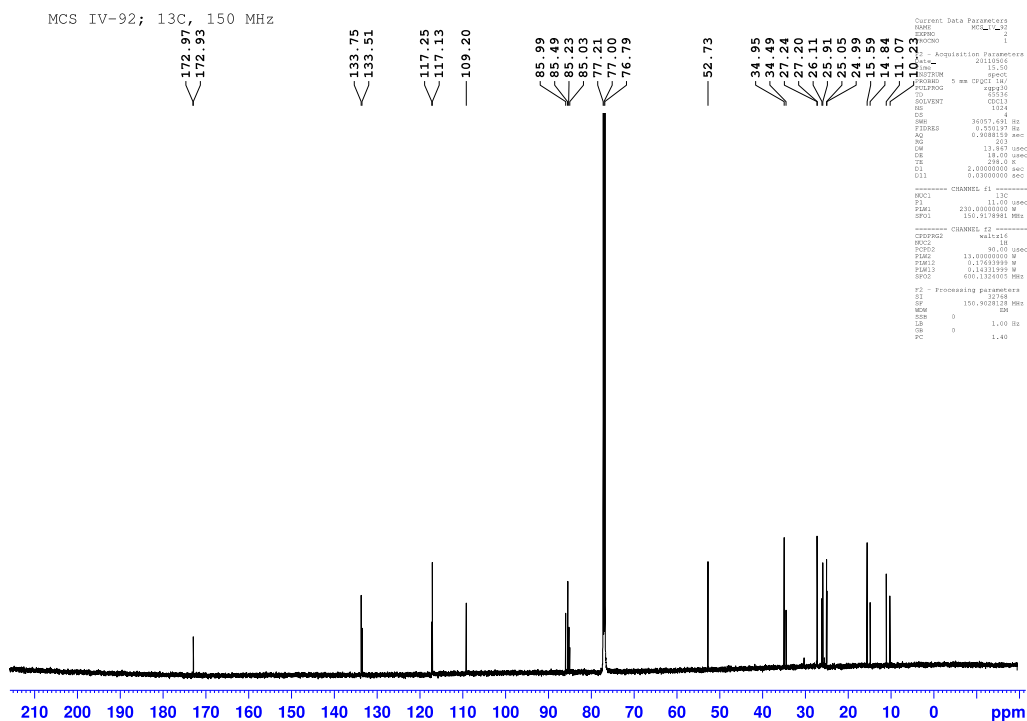

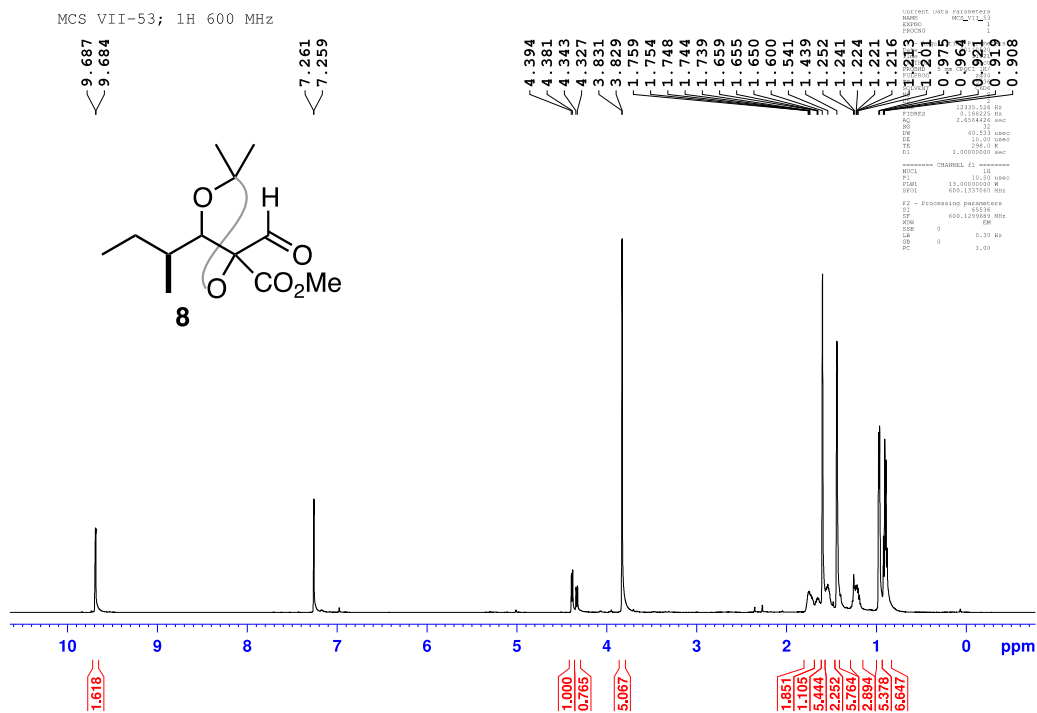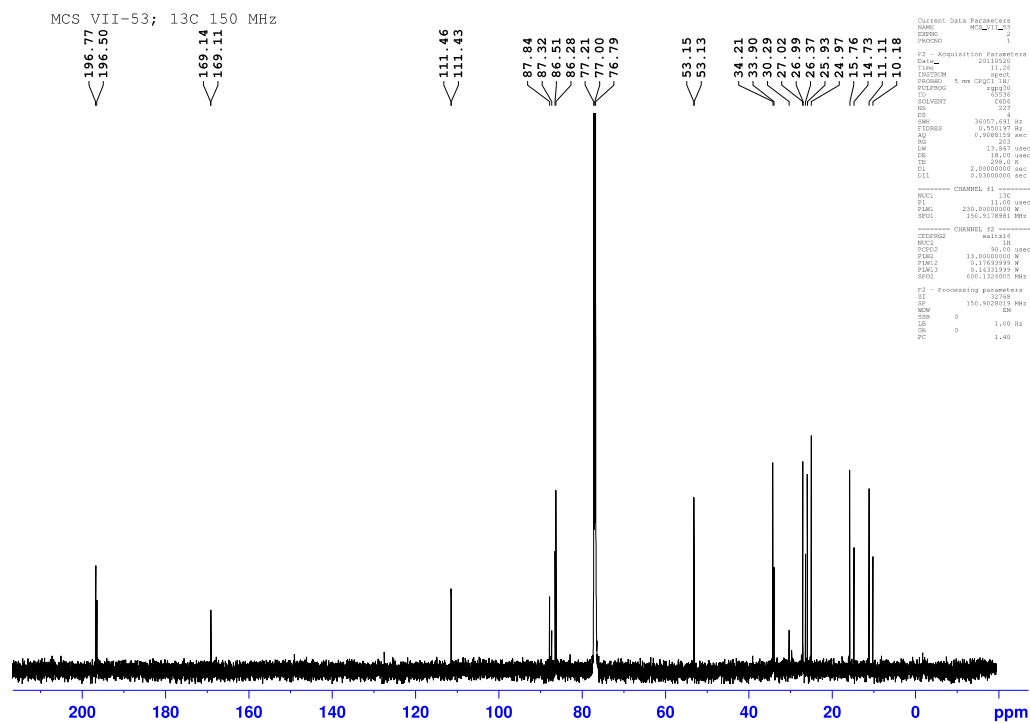

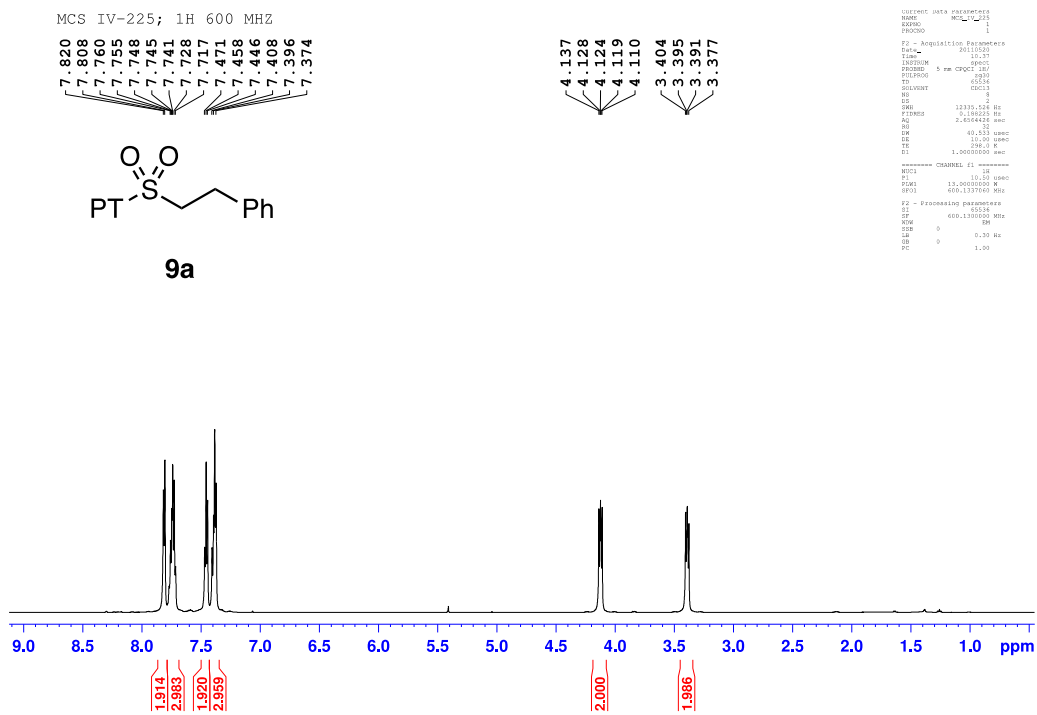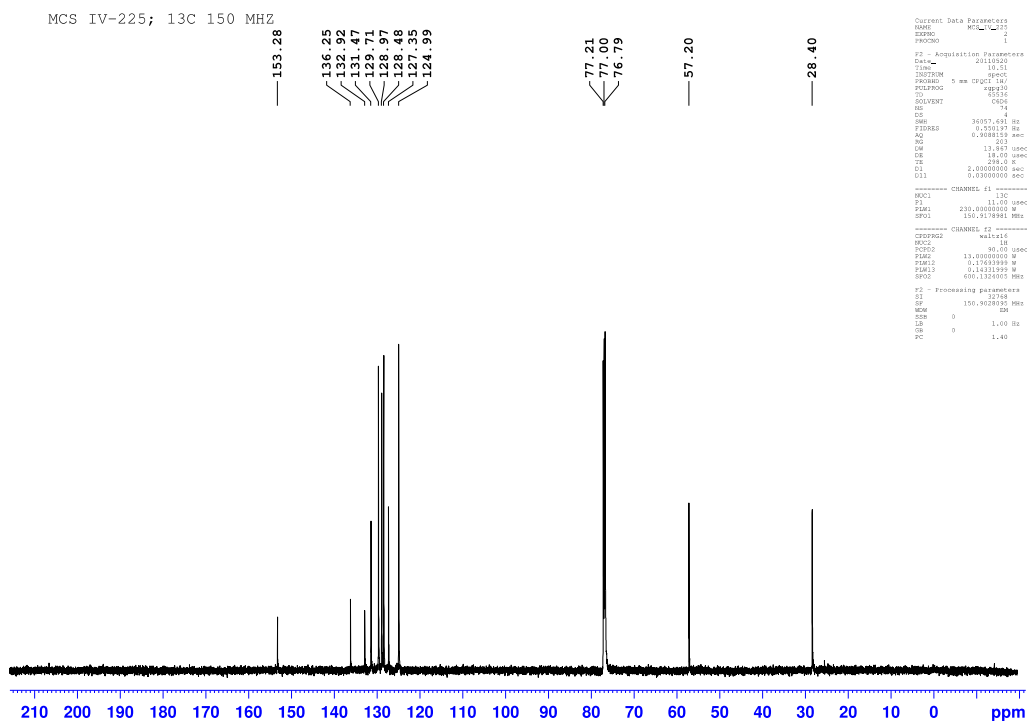

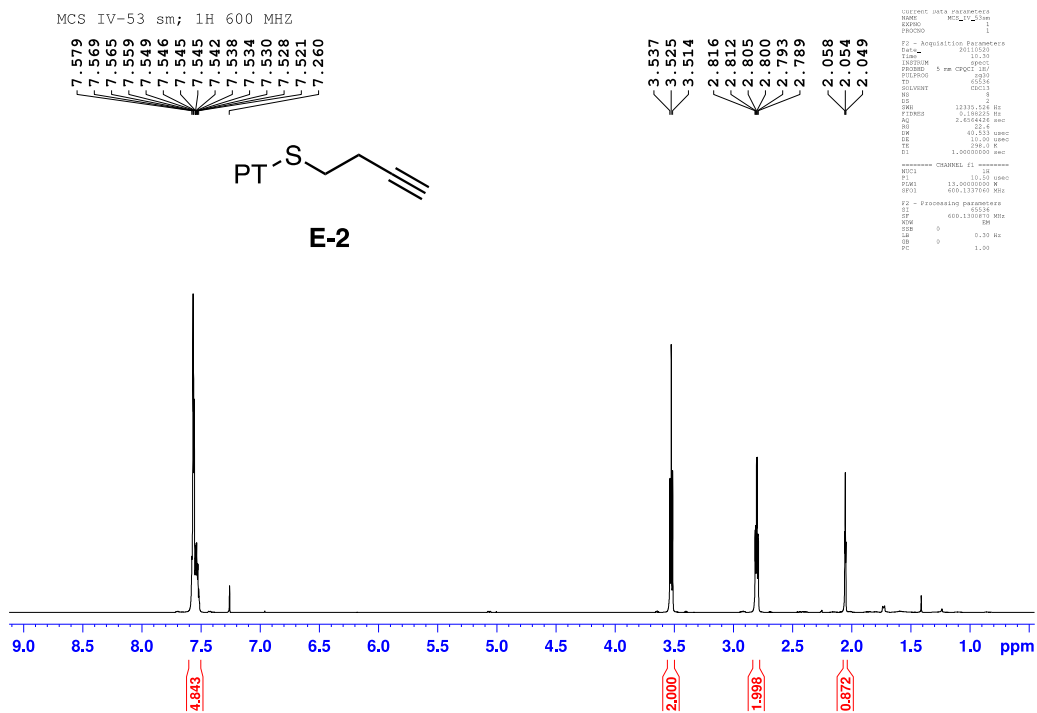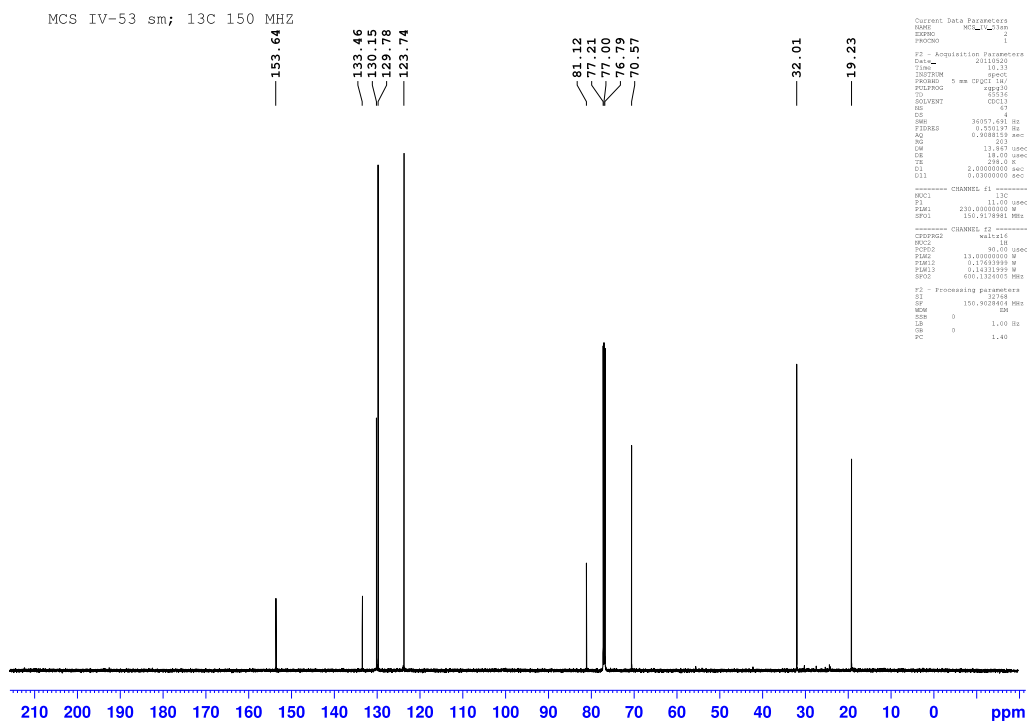

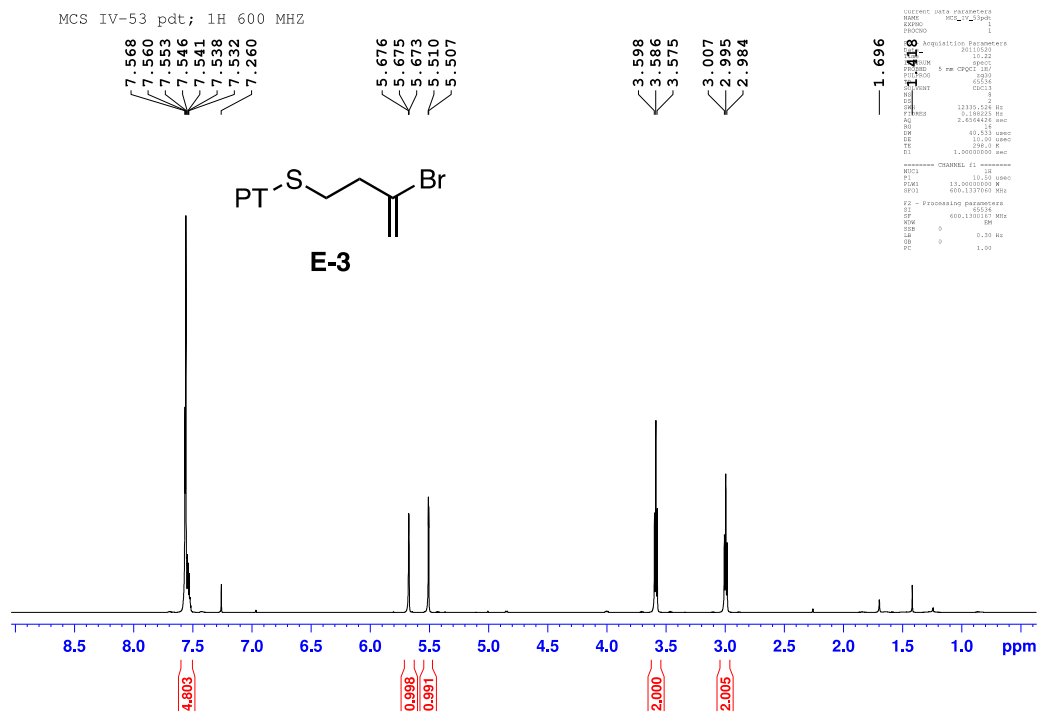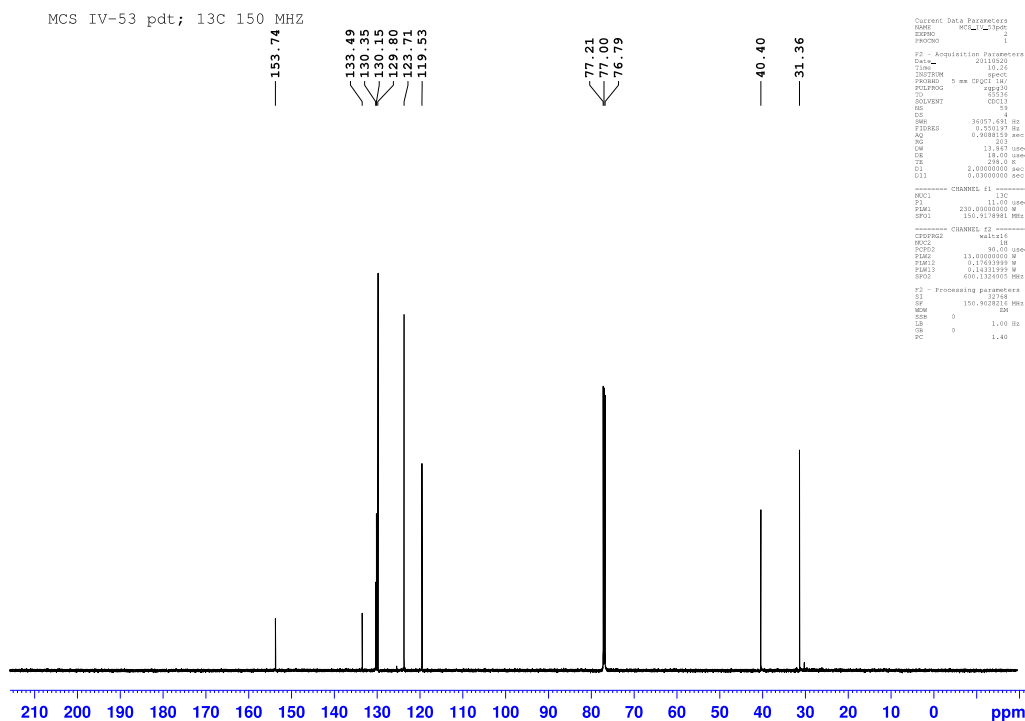

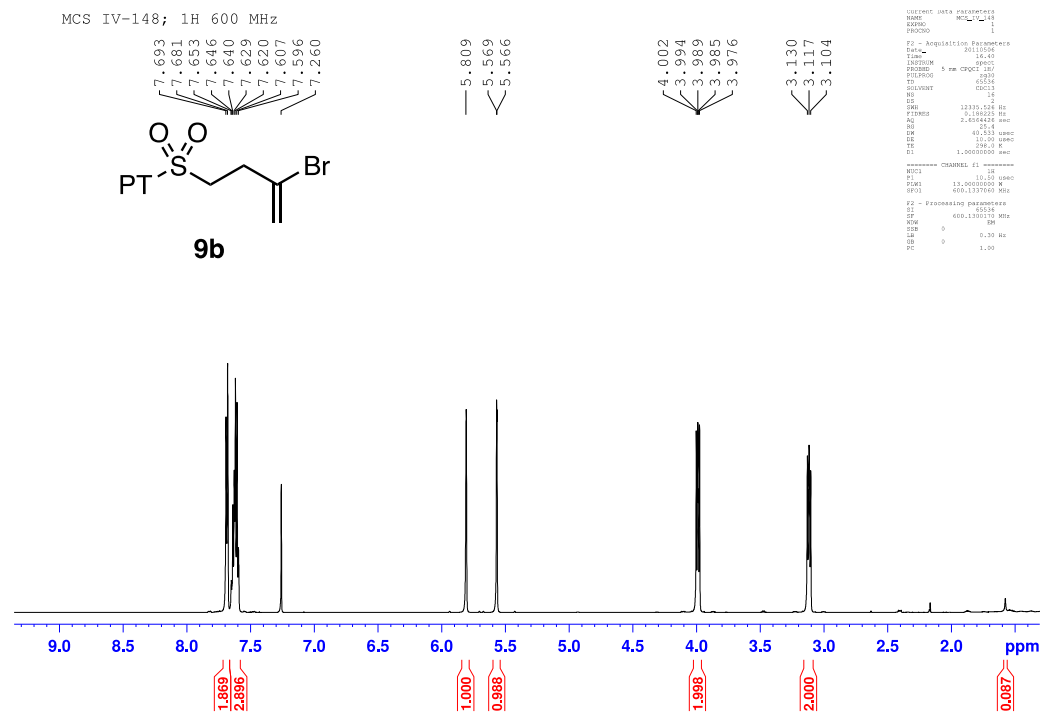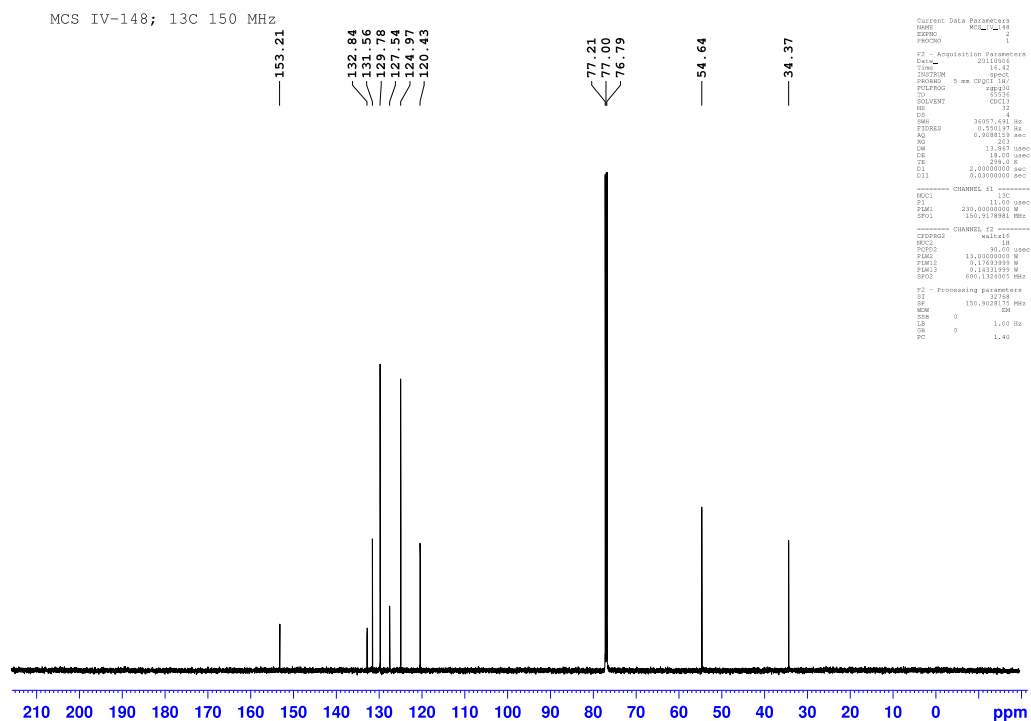



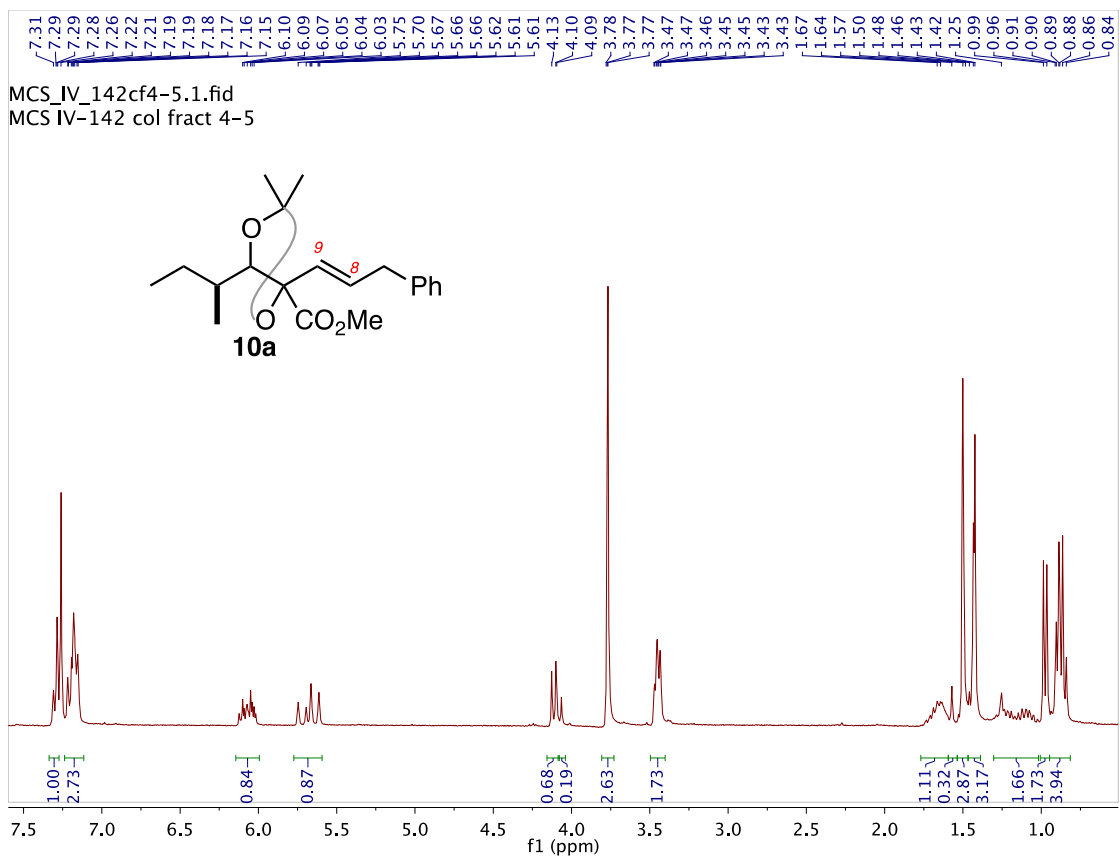

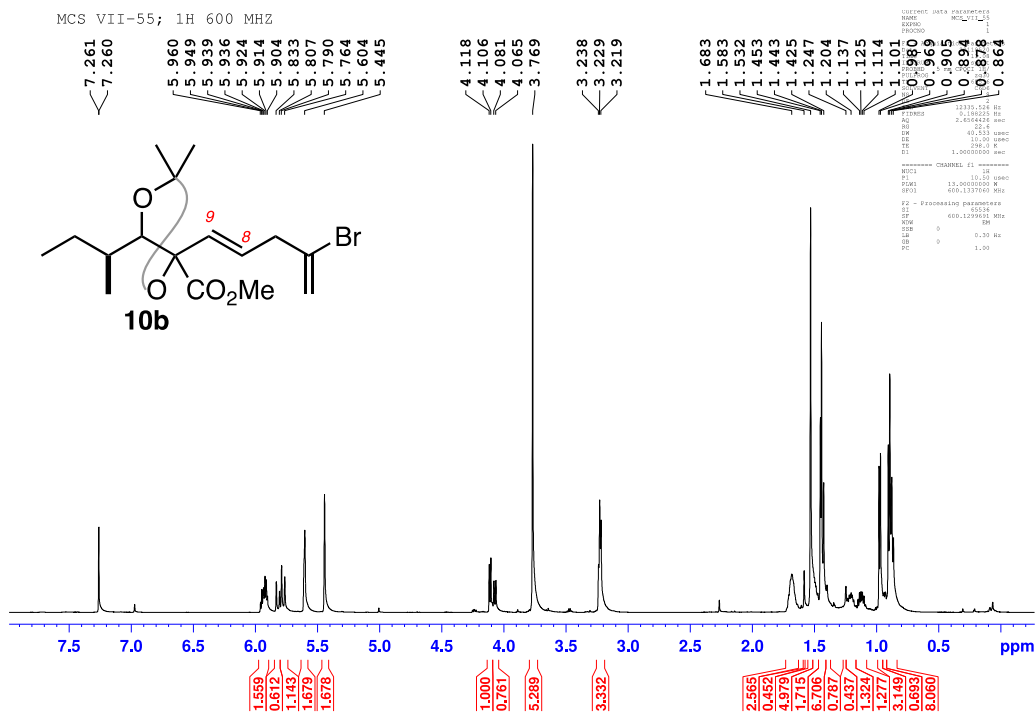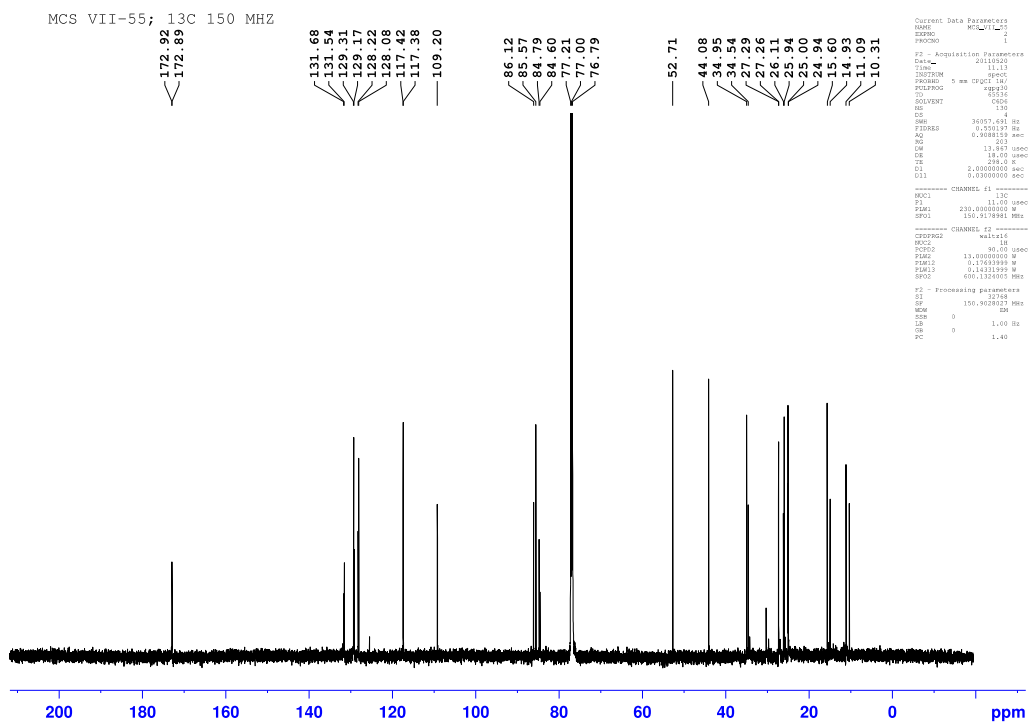

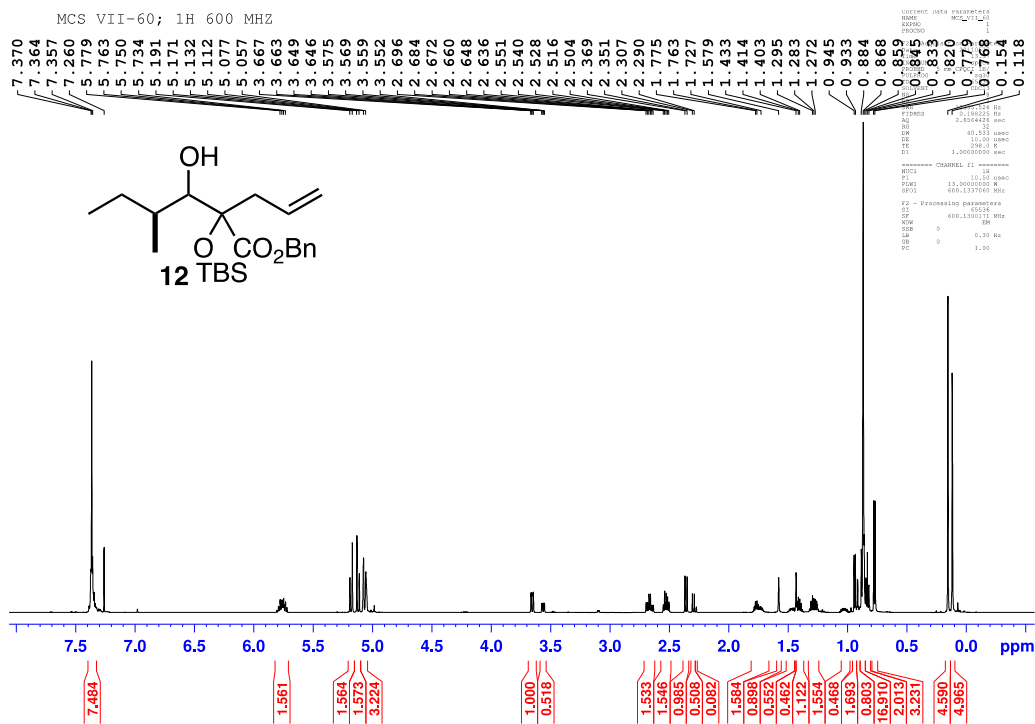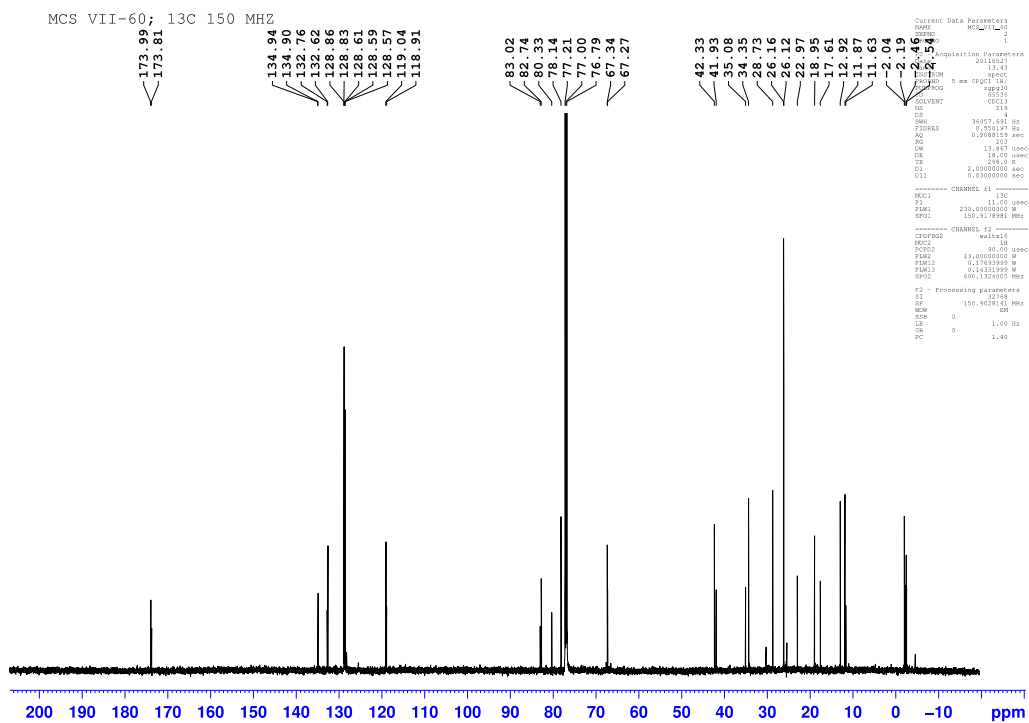

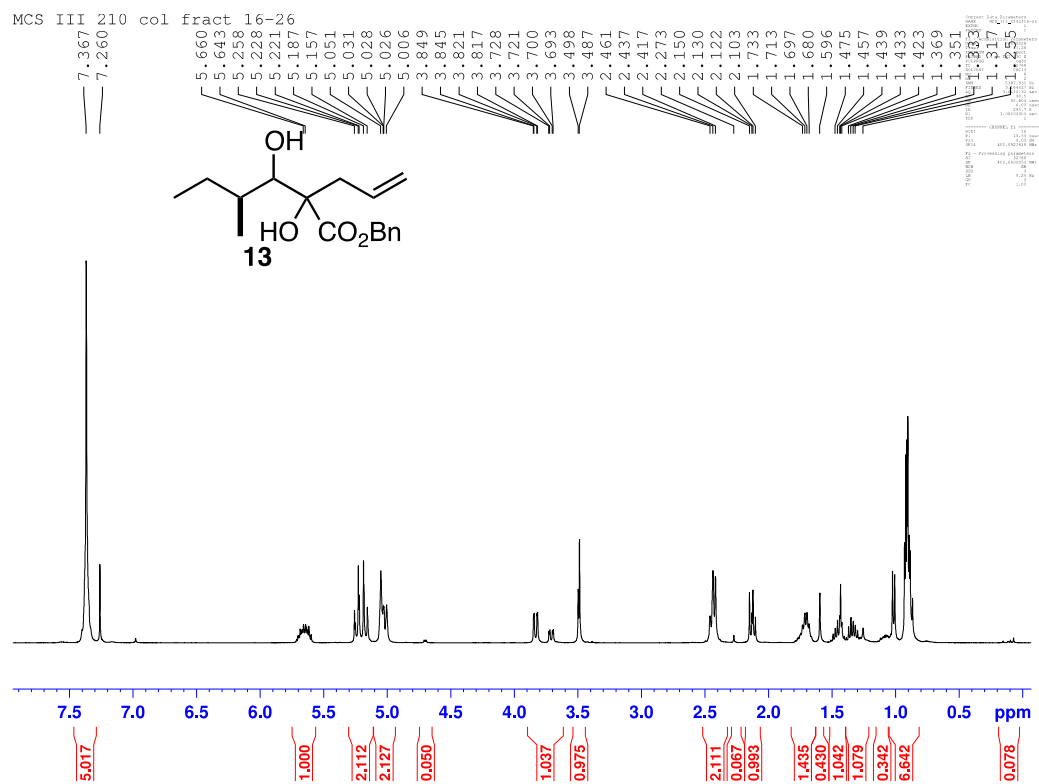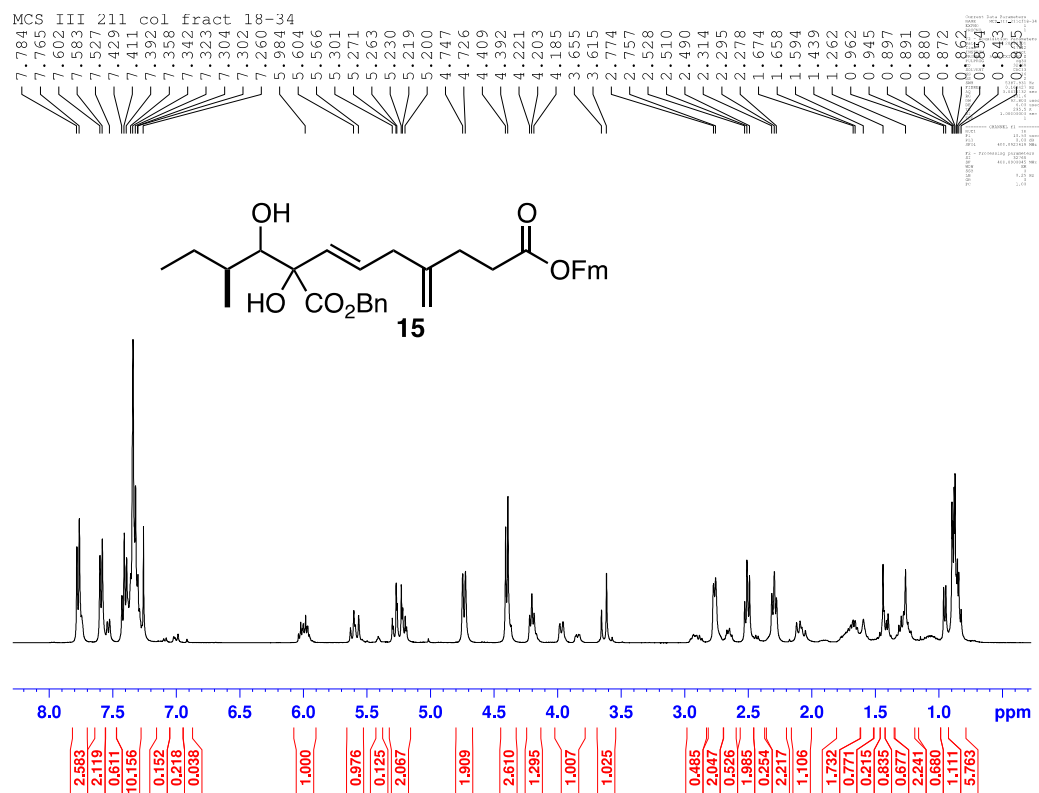

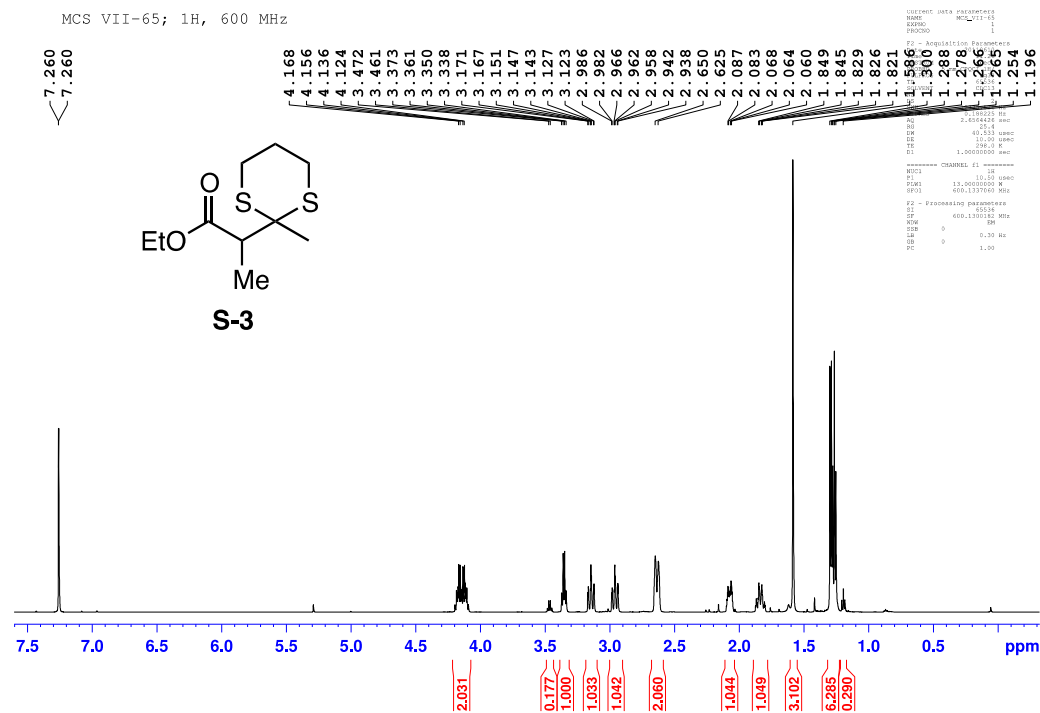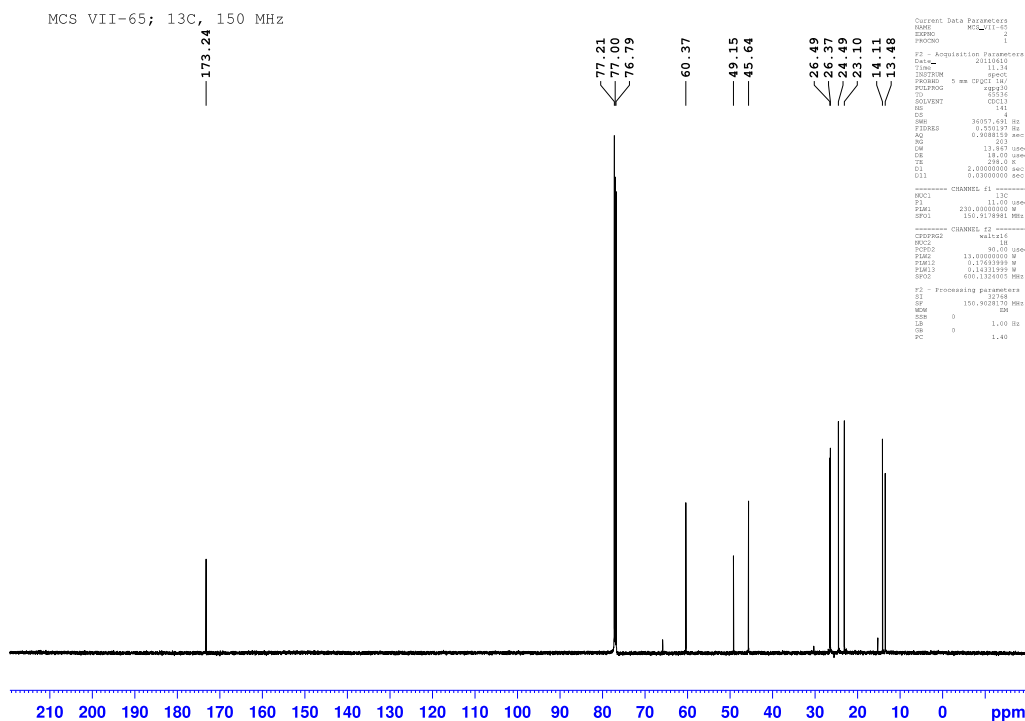

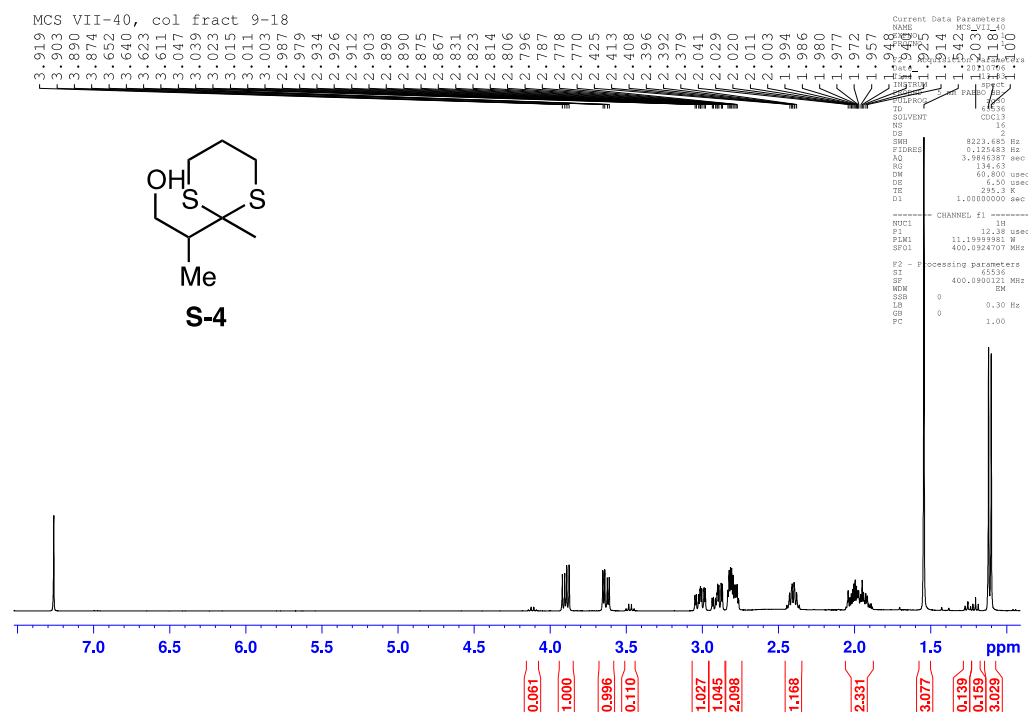

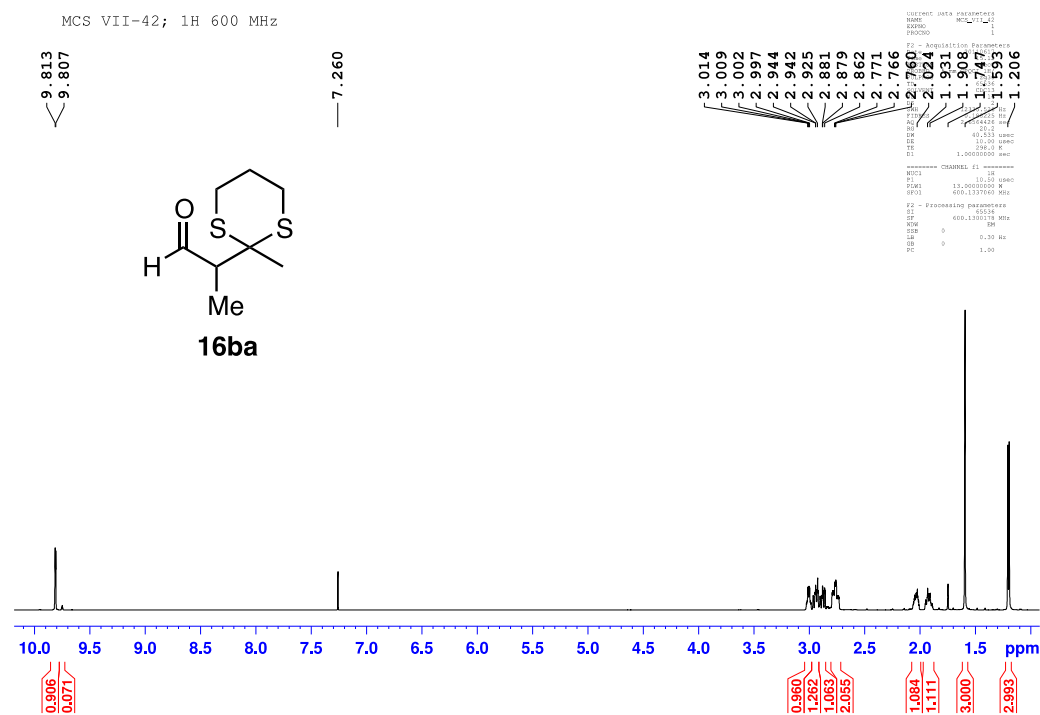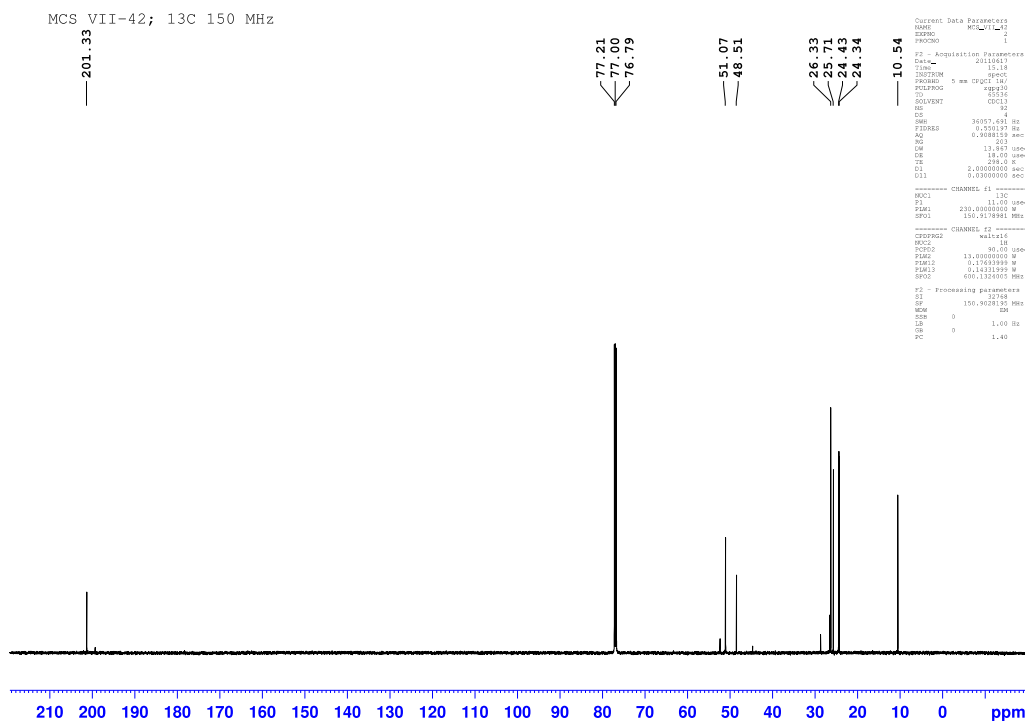

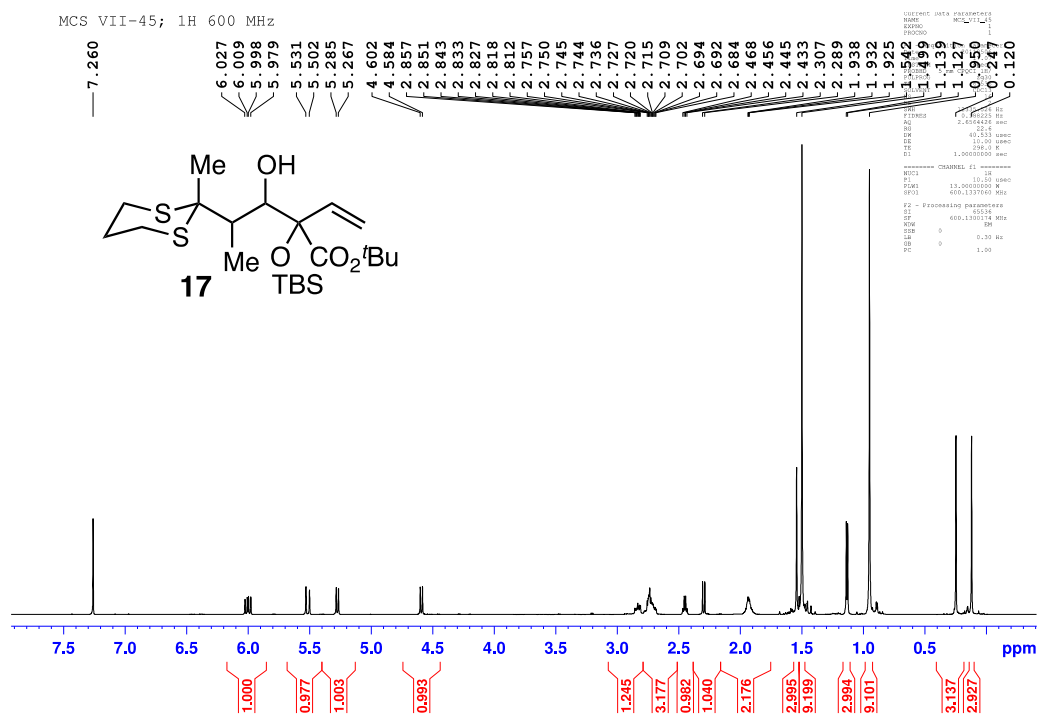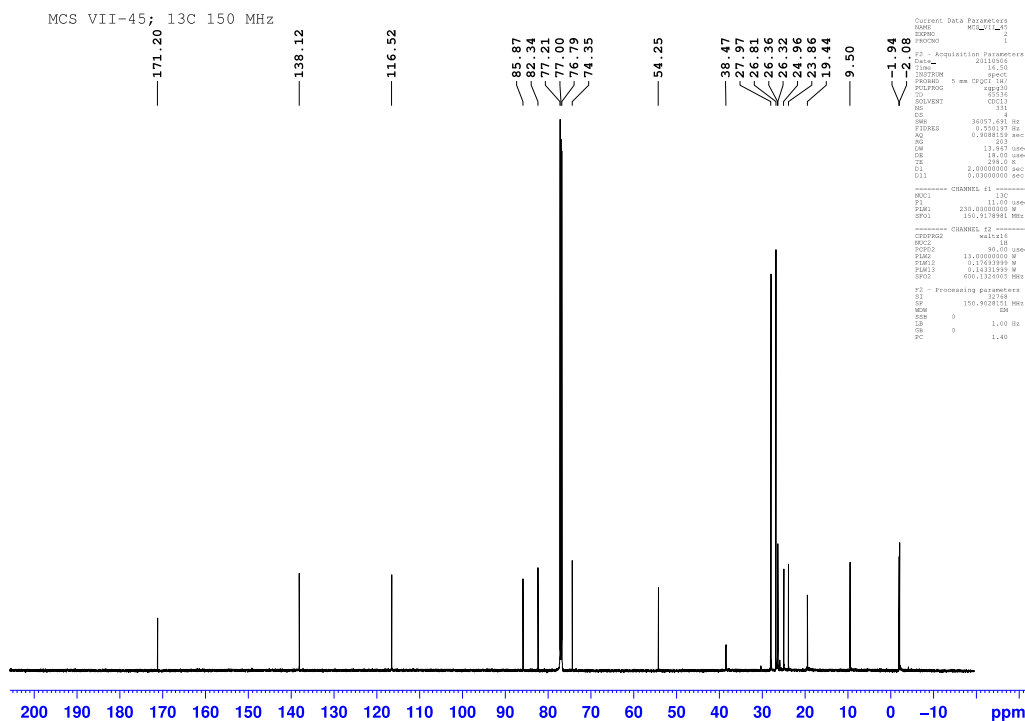



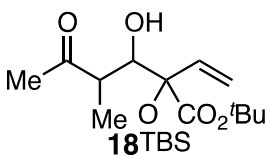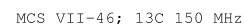

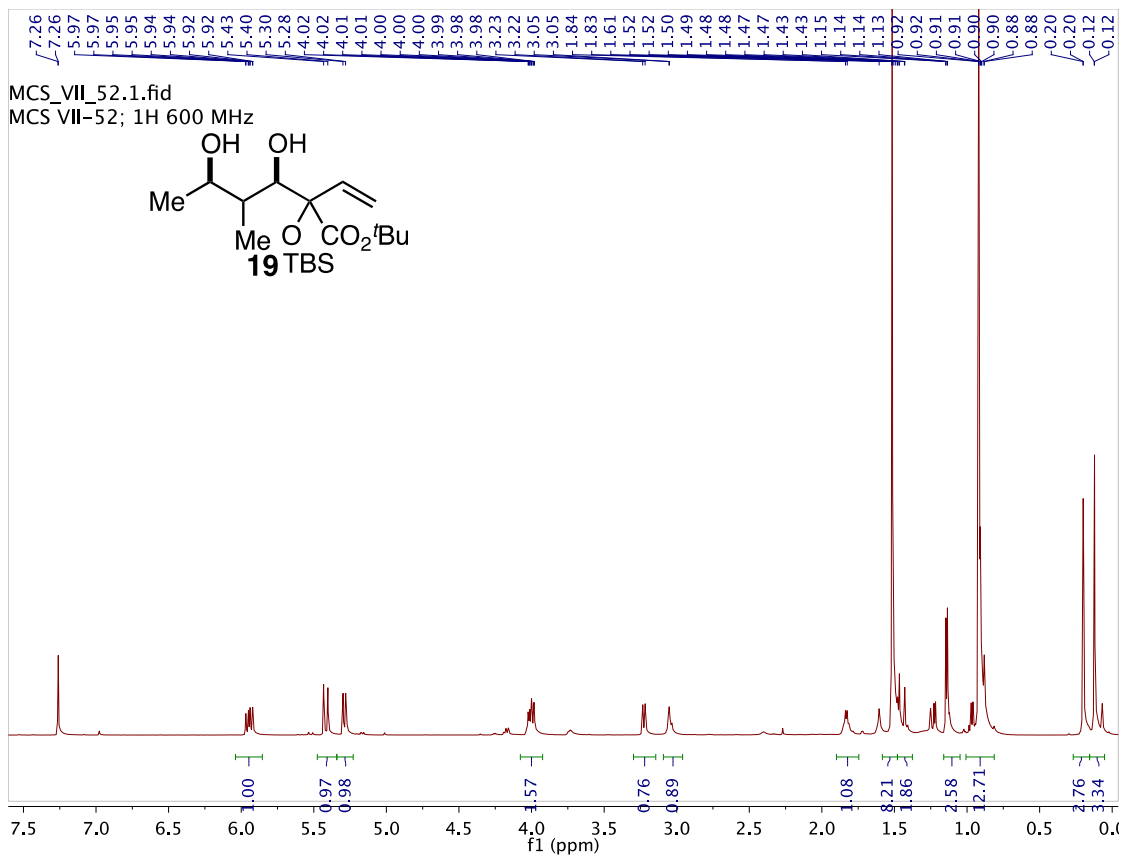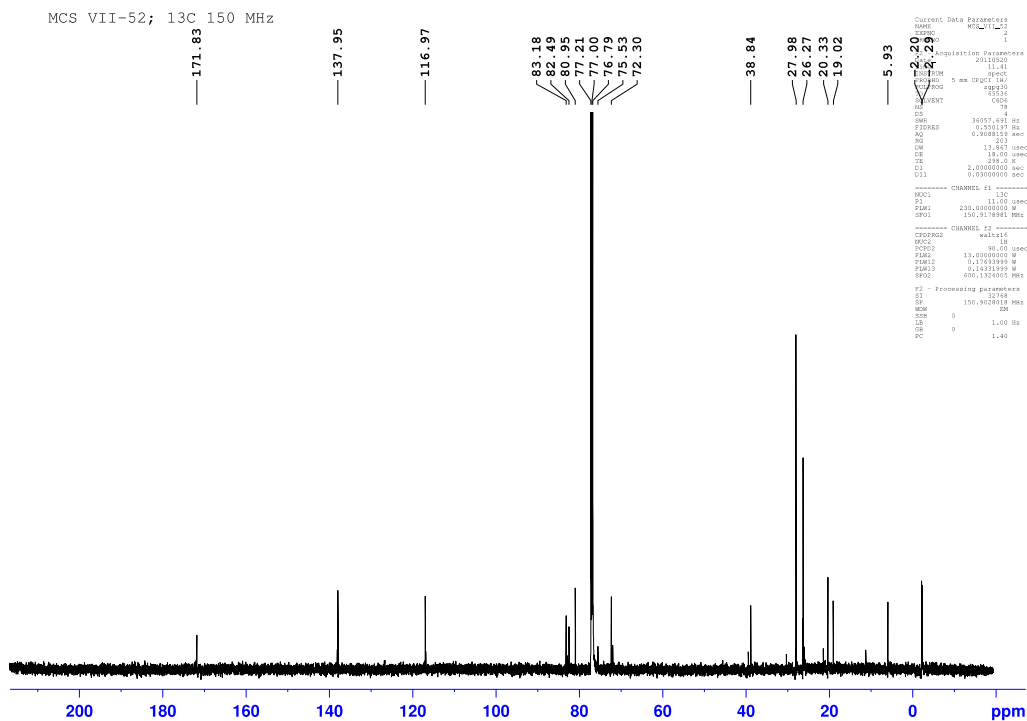

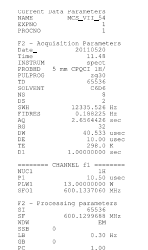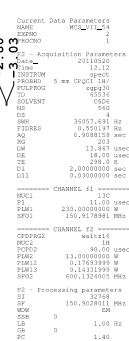

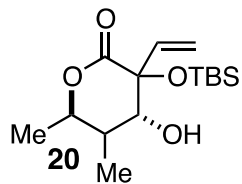

MCS VII-54; 600 MHz NOESY

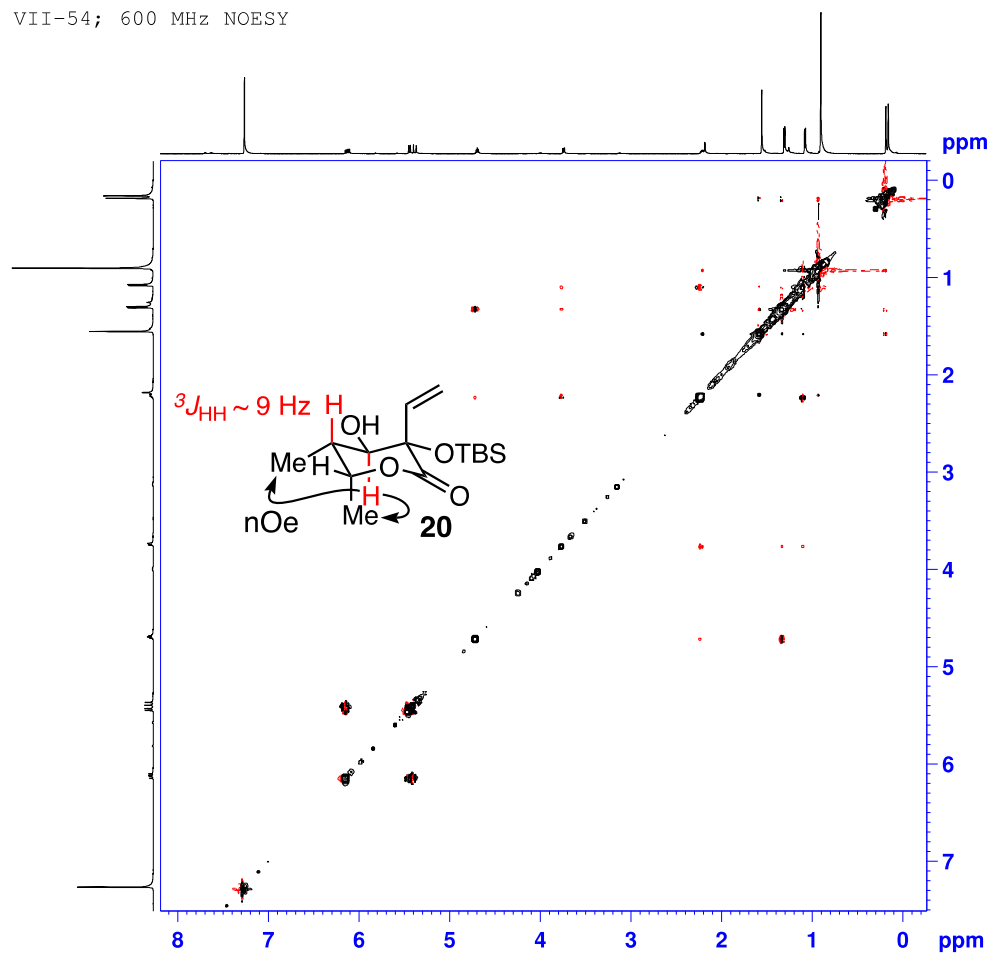

```

Current Data Parameters
NAME      MCS_VII_54
EXPNO     3
PROCNO    1

F2 - Acquisition Parameters
Date_     20110520
Time      15.07
INSTRUM   spect
PROBHD    5 mm CPQCI 1H/
PULPROG   noesypphpgp
TD         2048
SOLVENT   CDCl3
NS         4
DS         32
SWH        6127.451 Hz
FIDRES     2.991920 Hz
AQ         0.1671668 sec
RG         203
DW         81.600 usec
DE         10.00 usec
TE         298.0 K
D0         0.00000823 sec
D1         2.00000000 sec
D8         0.30000001 sec
D11        0.03000000 sec
D12        0.00020000 sec
D16        0.00020000 sec
IN0        0.00016320 sec

===== CHANNEL f1 =====
NUC1       1H
P1         10.50 usec
P2         21.00 usec
P17        2500.00 usec
PLN1       13.00000000 W
PLN10      2.12019992 W
SFO1       600.1327625 MHz

===== GRADIENT CHANNEL =====
GPM1       SMSQ10.100
GP11       40.00 u
P16        1000.00 usec

F1 - Acquisition parameters
TD         256
SFO1       600.1328 MHz
FIDRES     23.935356 Hz
SW         10.01210 ppm
PRMODE     States-TPP1

F2 - Processing parameters
SI         1024
SF         600.1300000 MHz
RGW        QSINE
SSB        2
LB         0 Hz
GB         0
PC         1.00

F1 - Processing parameters
SI         1024
MC2        States-TPP1
SF         600.1300000 MHz
RGW        2
SSB        2
LB         0 Hz
GB         0

```

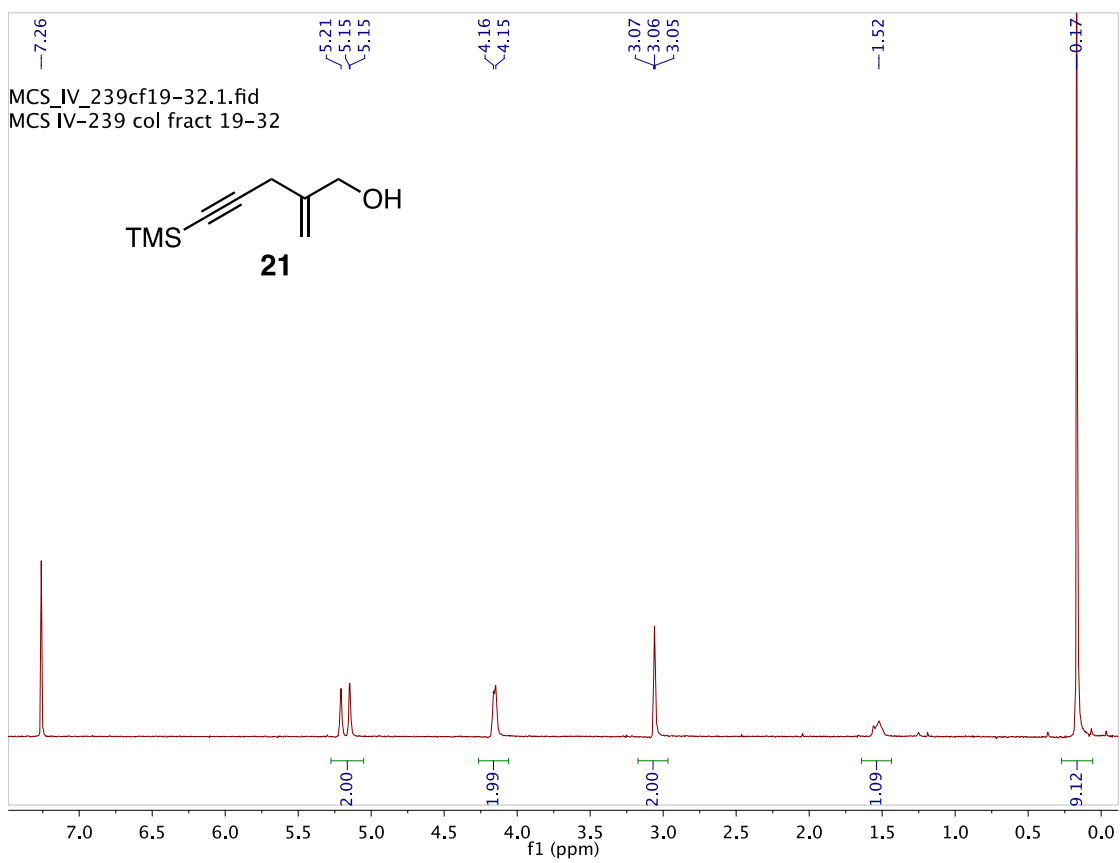

MCS V-197 col fract 10

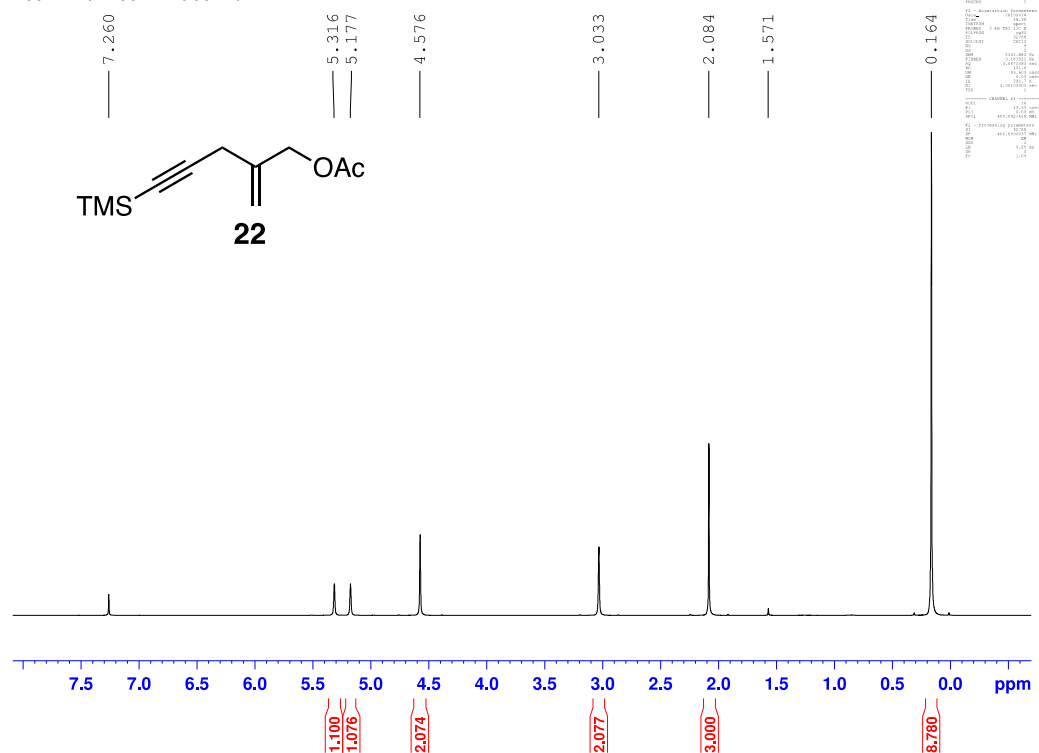

MCS V-197 col fract 10 13C

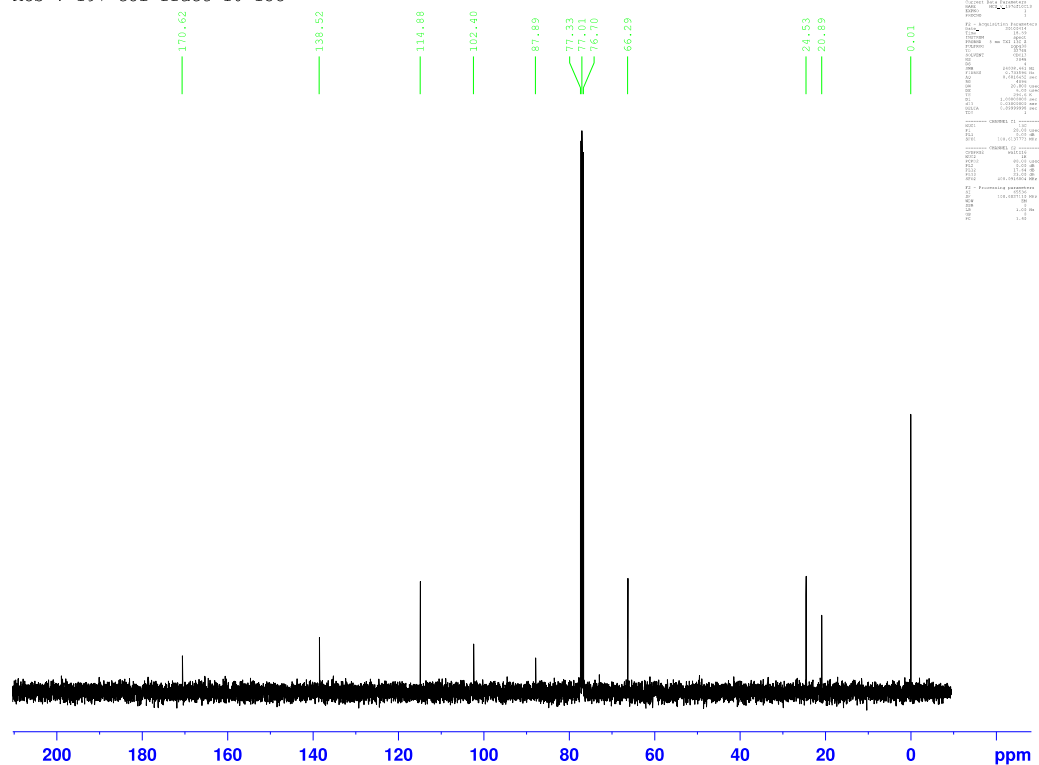

MCS VII-22 HPLC

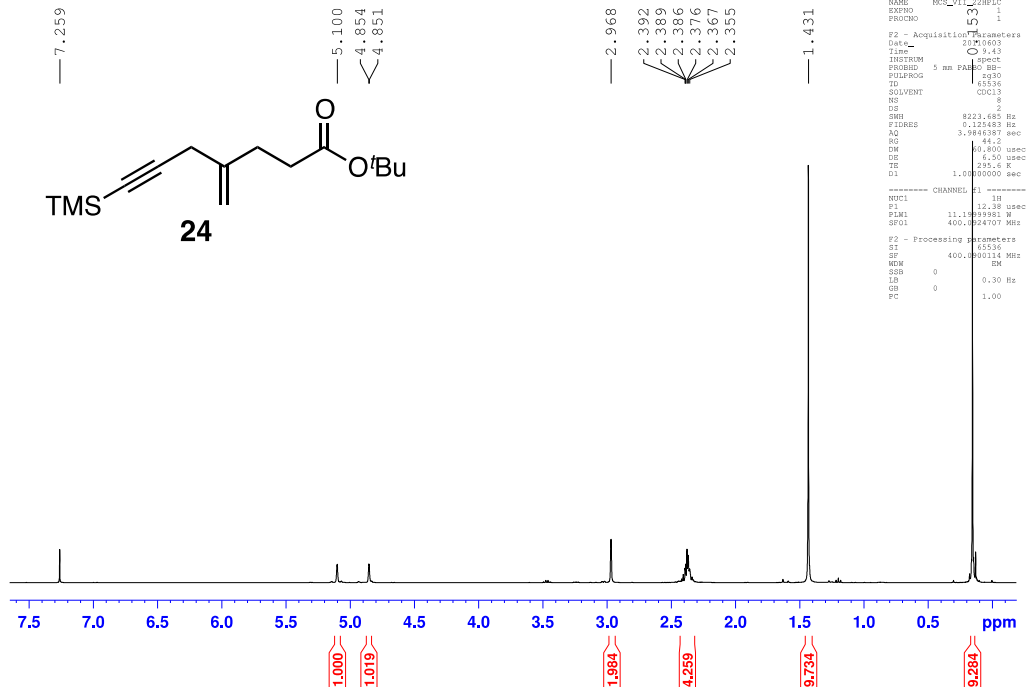

Current Data Parameters  
NAME MCS\_VII\_22HPLC  
EXPNO 1  
PROCNO 1  
F2 - Acquisition Parameters  
Date\_ 20100303  
Time 09:43  
INSTRUM spect  
PROBHD 5 mm PABBO  
PULPROG zgpg30  
TD 65536  
SOLVENT CDCl3  
NS 8  
DS 2  
SWH 8223.685 Hz  
FIDRES 0.125483 Hz  
AQ 3.966387 sec  
RG 64.0  
DM 80.000 usec  
DE 6.50 usec  
TE 293.2 K  
D1 1.0000000 sec  
----- CHANNEL f1 -----  
NUC1 13C  
P1 12.38 usec  
PL1 11.1983583 W  
SFO1 400.024707 MHz  
F2 - Processing parameters  
SI 52536  
SF 400.024707 MHz  
WDW EM  
SSB 0  
GB 0  
PC 1.00

MCS VII-22; <sup>13</sup>C, 150 MHz

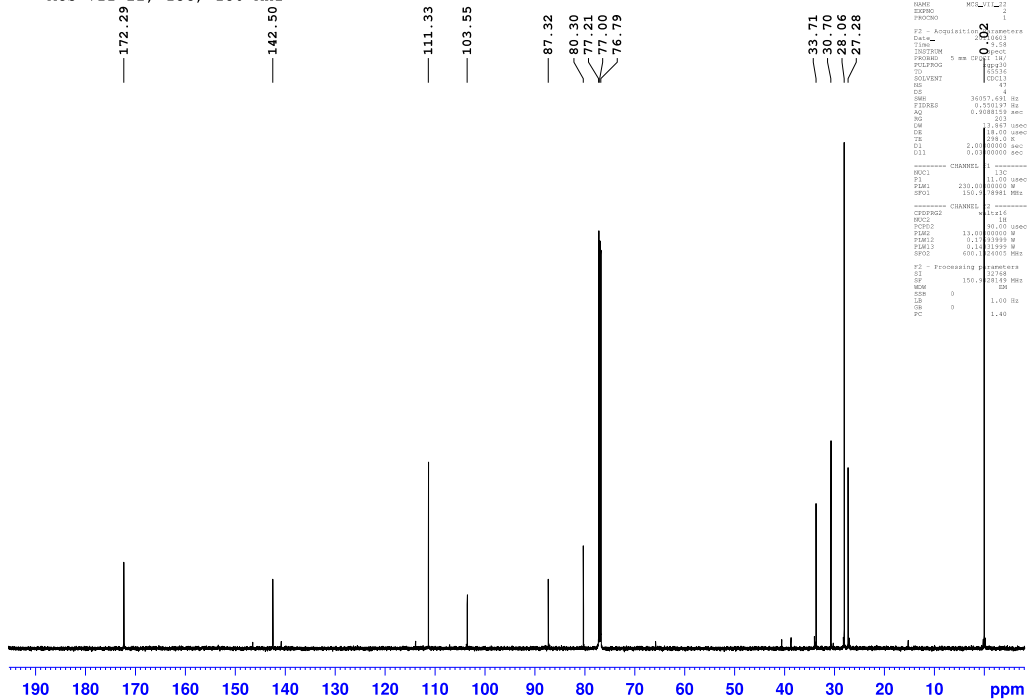

Current Data Parameters  
NAME MCS\_VII\_22  
EXPNO 1  
PROCNO 1  
F2 - Acquisition Parameters  
Date\_ 20100303  
Time 09:43  
INSTRUM spect  
PROBHD 5 mm PABBO  
PULPROG zgpg30  
TD 65536  
SOLVENT CDCl3  
NS 8  
DS 2  
SWH 36057.431 Hz  
FIDRES 0.30149 Hz  
AQ 6.408129 sec  
RG 64.0  
DM 80.000 usec  
DE 6.50 usec  
TE 293.2 K  
D1 2.0000000 sec  
D11 0.0500000 sec  
----- CHANNEL f1 -----  
NUC1 13C  
P1 12.38 usec  
PL1 11.1983583 W  
SFO1 400.024707 MHz  
----- CHANNEL f2 -----  
NUC2 13C  
P2 12.38 usec  
PL2 11.1983583 W  
SFO2 400.024707 MHz  
F2 - Processing parameters  
SI 52536  
SF 400.024707 MHz  
WDW EM  
SSB 0  
GB 0  
PC 1.00

MCS V-205 pdt

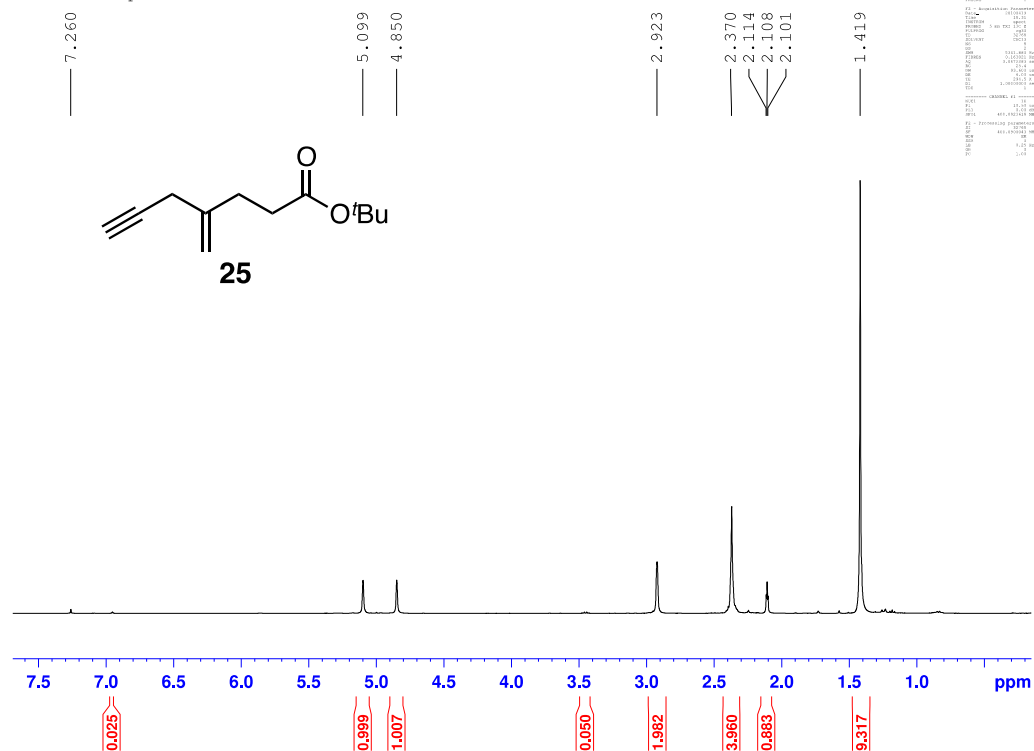

MCS V-205 pdt-- <sup>13</sup>C

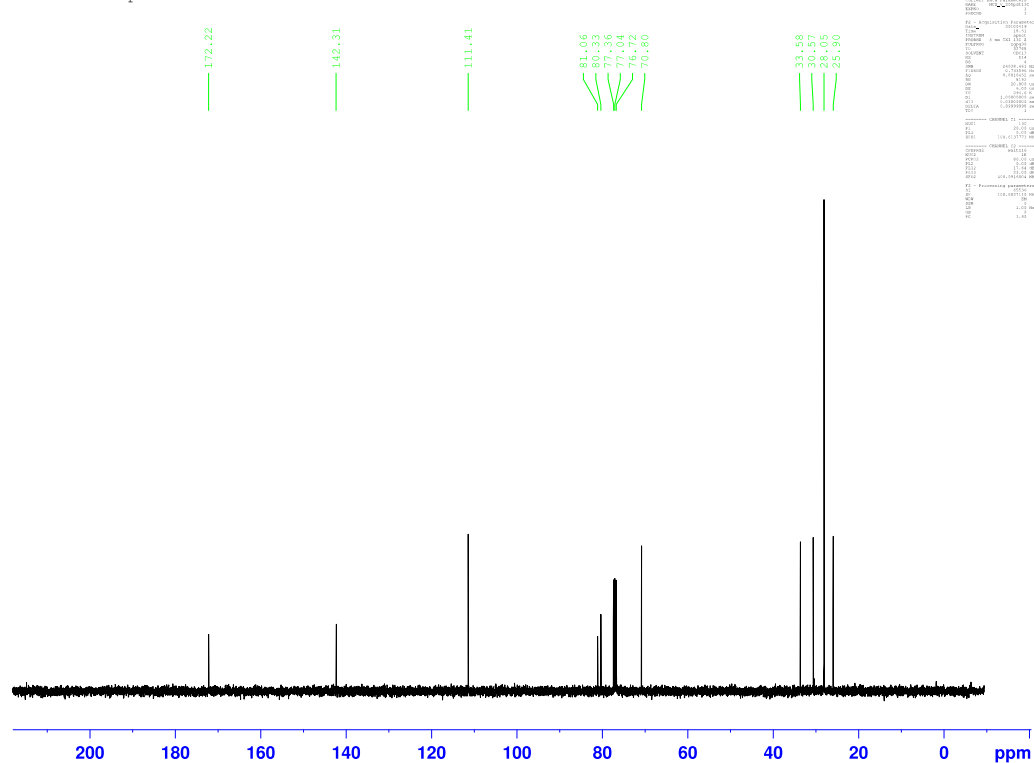



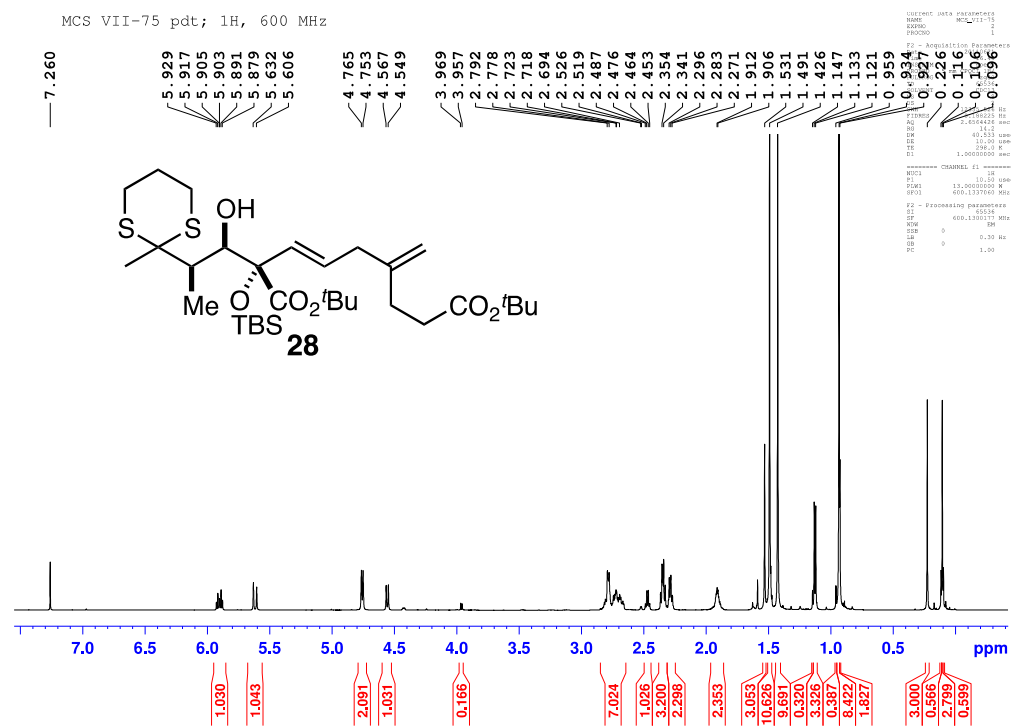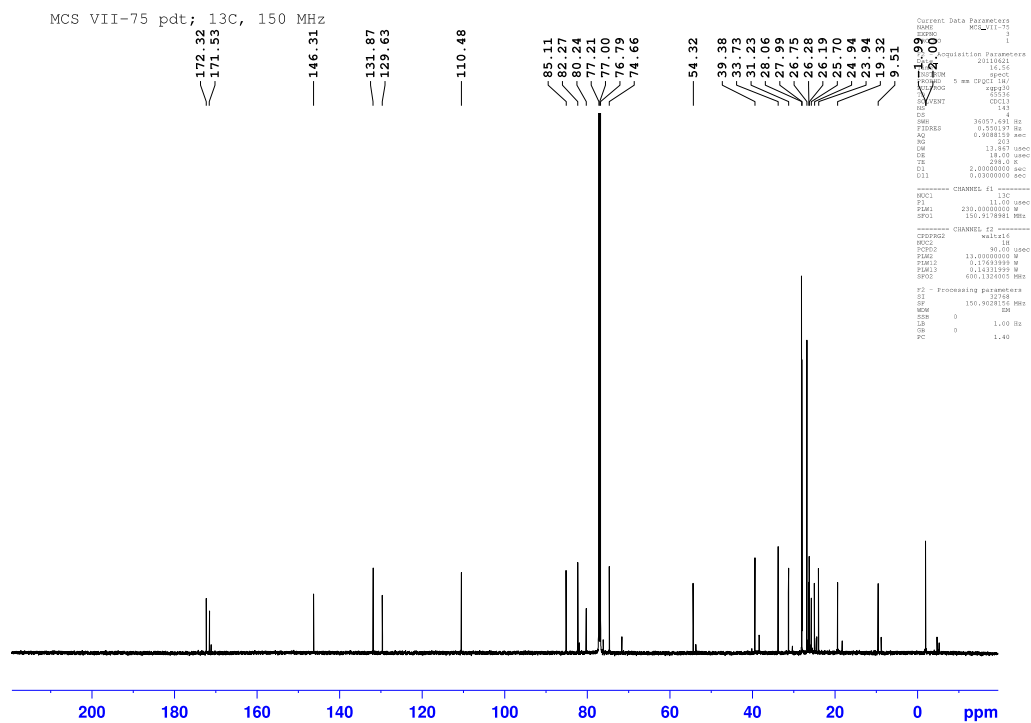

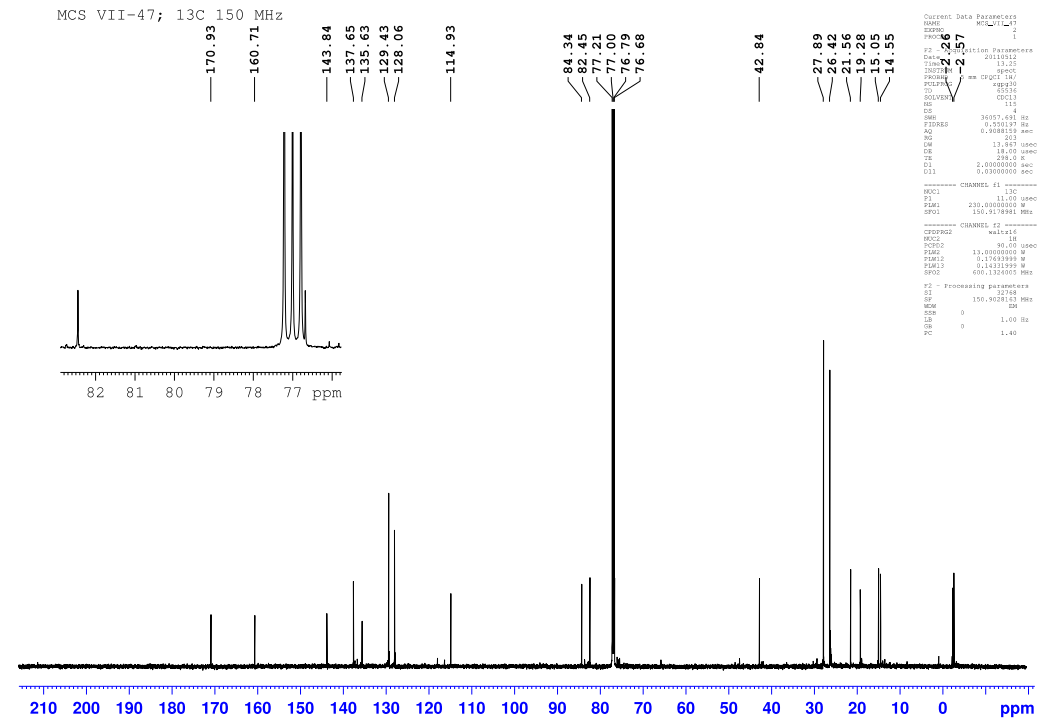

Chemical structure of **S-9** is shown above the spectrum:

CC1(C)C(C(C1)C(C)C)C(C(C)(C)OC(=O)C(C)(C)C)O

**1H NMR spectrum (CDCl<sub>3</sub>) data:**

**Chemical Shifts (ppm):** 7.260, 3.848, 3.831, 3.814, 3.484, 3.473, 3.360, 2.360, 2.348, 2.343, 2.335, 2.330, 2.323, 2.318, 2.305, 2.301, 1.667, 1.659, 1.651, 1.642, 1.633, 1.629, 1.615, 1.556, 1.483, 1.466, 1.097, 1.086, 0.928, 0.920, 0.856, 0.844, 0.221, 0.151.

**Integration values:** 1.000, 0.147, 0.974, 1.990, 0.896, 1.561, 9.182, 0.270, 2.943, 12.147, 3.037, 3.193, 2.933.

**Processing Parameters:**

- NAME: S-9
- EXPNO: 1
- PROCNO: 1
- PROCPS: 1
- RG: 320
- RG2: 320
- RG3: 320
- RG4: 320
- RG5: 320
- RG6: 320
- RG7: 320
- RG8: 320
- RG9: 320
- RG10: 320
- RG11: 320
- RG12: 320
- RG13: 320
- RG14: 320
- RG15: 320
- RG16: 320
- RG17: 320
- RG18: 320
- RG19: 320
- RG20: 320
- RG21: 320
- RG22: 320
- RG23: 320
- RG24: 320
- RG25: 320
- RG26: 320
- RG27: 320
- RG28: 320
- RG29: 320
- RG30: 320
- RG31: 320
- RG32: 320
- RG33: 320
- RG34: 320
- RG35: 320
- RG36: 320
- RG37: 320
- RG38: 320
- RG39: 320
- RG40: 320
- RG41: 320
- RG42: 320
- RG43: 320
- RG44: 320
- RG45: 320
- RG46: 320
- RG47: 320
- RG48: 320
- RG49: 320
- RG50: 320
- RG51: 320
- RG52: 320
- RG53: 320
- RG54: 320
- RG55: 320
- RG56: 320
- RG57: 320
- RG58: 320
- RG59: 320
- RG60: 320
- RG61: 320
- RG62: 320
- RG63: 320
- RG64: 320
- RG65: 320
- RG66: 320
- RG67: 320
- RG68: 320
- RG69: 320
- RG70: 320
- RG71: 320
- RG72: 320
- RG73: 320
- RG74: 320
- RG75: 320
- RG76: 320
- RG77: 320
- RG78: 320
- RG79: 320
- RG80: 320
- RG81: 320
- RG82: 320
- RG83: 320
- RG84: 320
- RG85: 320
- RG86: 320
- RG87: 320
- RG88: 320
- RG89: 320
- RG90: 320
- RG91: 320
- RG92: 320
- RG93: 320
- RG94: 320
- RG95: 320
- RG96: 320
- RG97: 320
- RG98: 320
- RG99: 320
- RG100: 320
- RG101: 320
- RG102: 320
- RG103: 320
- RG104: 320
- RG105: 320
- RG106: 320
- RG107: 320
- RG108: 320
- RG109: 320
- RG110: 320
- RG111: 320
- RG112: 320
- RG113: 320
- RG114: 320
- RG115: 320
- RG116: 320
- RG117: 320
- RG118: 320
- RG119: 320
- RG120: 320
- RG121: 320
- RG122: 320
- RG123: 320
- RG124: 320
- RG125: 320
- RG126: 320
- RG127: 320
- RG128: 320
- RG129: 320
- RG130: 320
- RG131: 320
- RG132: 320
- RG133: 320
- RG134: 320
- RG135: 320
- RG136: 320
- RG137: 320
- RG138: 320
- RG139: 320
- RG140: 320
- RG141: 320
- RG142: 320
- RG143: 320
- RG144: 320
- RG145: 320
- RG146: 320
- RG147: 320
- RG148: 320
- RG149: 320
- RG150: 320
- RG151: 320
- RG152: 320
- RG153: 320
- RG154: 320
- RG155: 320
- RG156: 320
- RG157: 320
- RG158: 320
- RG159: 320
- RG160: 320
- RG161: 320
- RG162: 320
- RG163: 320
- RG164: 320
- RG165: 320
- RG166: 320
- RG167: 320
- RG168: 320
- RG169: 320
- RG170: 320
- RG171: 320
- RG172: 320
- RG173: 320
- RG174: 320
- RG175: 320
- RG176: 320
- RG177: 320
- RG178: 320
- RG179: 320
- RG180: 320
- RG181: 320
- RG182: 320
- RG183: 320
- RG184: 320
- RG185: 320
- RG186: 320
- RG187: 320
- RG188: 320
- RG189: 320
- RG190: 320
- RG191: 320
- RG192: 320
- RG193: 320
- RG194: 320
- RG195: 320
- RG196: 320
- RG197: 320
- RG198: 320
- RG199: 320
- RG200: 320
- RG201: 320
- RG202: 320
- RG203: 320
- RG204: 320
- RG205: 320
- RG206: 320
- RG207: 320
- RG208: 320
- RG209: 320
- RG210: 320
- RG211: 320
- RG212: 320
- RG213: 320
- RG214: 320
- RG215: 320
- RG216: 320
- RG217: 320
- RG218: 320
- RG219: 320
- RG220: 320
- RG221: 320
- RG222: 320
- RG223: 320
- RG224: 320
- RG225: 320
- RG226: 320
- RG227: 320
- RG228: 320
- RG229: 320
- RG230: 320
- RG231: 320
- RG232: 320
- RG233: 320
- RG234: 320
- RG235: 320
- RG236: 320
- RG237: 320
- RG238: 320
- RG239: 320
- RG240: 320
- RG241: 320
- RG242: 320
- RG243: 320
- RG244: 320
- RG245: 320
- RG246: 320
- RG247: 320
- RG248: 320
- RG249: 320
- RG250: 320
- RG251: 320
- RG252: 320
- RG253: 320
- RG254: 320
- RG255: 320
- RG256: 320
- RG257: 320
- RG258: 320
- RG259: 320
- RG260: 320

Chemical shift (ppm): 200, 190, 180, 170, 160, 150, 140, 130, 120, 110, 100, 90, 80, 70, 60, 50, 40, 30, 20, 10, 0, -10

Integration values (from left to right): 172.89, 87.44, 82.91, 81.36, 77.21, 77.00, 76.79, 47.27, 41.03, 39.17, 27.98, 26.48, 19.57, 16.86, 15.95, 9.53, -2.23, -2.65

Peak list (ppm): 172.89, 87.44, 82.91, 81.36, 77.21, 77.00, 76.79, 47.27, 41.03, 39.17, 27.98, 26.48, 19.57, 16.86, 15.95, 9.53, -2.23, -2.65

Processing parameters:

```

===== CHANNEL f1 =====
NUC1 13C
P1 15.00 UPRG
P1M1 220.00000000 Hz
P1M2 150.2678961 MHz
P1M3
===== CHANNEL f2 =====
CPDPRG2 waltz16
NUC2 1H
P2 10.00 UPRG
P2M1 13.00000000 MHz
P2M2 0.1763399 MHz
P2M3 0.16231999 MHz
P2M4 600.1326005 MHz
===== CHANNEL f3 =====
P3 15.00 UPRG
P3M1 150.2678961 MHz
P3M2
===== CHANNEL f4 =====
P4 15.00 UPRG
P4M1 150.2678961 MHz
P4M2
===== CHANNEL f5 =====
P5 15.00 UPRG
P5M1 150.2678961 MHz
P5M2
===== CHANNEL f6 =====
P6 15.00 UPRG
P6M1 150.2678961 MHz
P6M2
===== CHANNEL f7 =====
P7 15.00 UPRG
P7M1 150.2678961 MHz
P7M2
===== CHANNEL f8 =====
P8 15.00 UPRG
P8M1 150.2678961 MHz
P8M2
===== CHANNEL f9 =====
P9 15.00 UPRG
P9M1 150.2678961 MHz
P9M2
===== CHANNEL f10 =====
P10 15.00 UPRG
P10M1 150.2678961 MHz
P10M2
===== CHANNEL f11 =====
P11 15.00 UPRG
P11M1 150.2678961 MHz
P11M2
===== CHANNEL f12 =====
P12 15.00 UPRG
P12M1 150.2678961 MHz
P12M2
===== CHANNEL f13 =====
P13 15.00 UPRG
P13M1 150.2678961 MHz
P13M2
===== CHANNEL f14 =====
P14 15.00 UPRG
P14M1 150.2678961 MHz
P14M2
===== CHANNEL f15 =====
P15 15.00 UPRG
P15M1 150.2678961 MHz
P15M2
===== CHANNEL f16 =====
P16 15.00 UPRG
P16M1 150.2678961 MHz
P16M2
===== CHANNEL f17 =====
P17 15.00 UPRG
P17M1 150.2678961 MHz
P17M2
===== CHANNEL f18 =====
P18 15.00 UPRG
P18M1 150.2678961 MHz
P18M2
===== CHANNEL f19 =====
P19 15.00 UPRG
P19M1 150.2678961 MHz
P19M2
===== CHANNEL f20 =====
P20 15.00 UPRG
P20M1 150.2678961 MHz
P20M2
===== CHANNEL f21 =====
P21 15.00 UPRG
P21M1 150.2678961 MHz
P21M2
===== CHANNEL f22 =====
P22 15.00 UPRG
P22M1 150.2678961 MHz
P22M2
===== CHANNEL f23 =====
P23 15.00 UPRG
P23M1 150.2678961 MHz
P23M2
===== CHANNEL f24 =====
P24 15.00 UPRG
P24M1 150.2678961 MHz
P24M2
===== CHANNEL f25 =====
P25 15.00 UPRG
P25M1 150.2678961 MHz
P25M2
===== CHANNEL f26 =====
P26 15.00 UPRG
P26M1 150.2678961 MHz
P26M2
===== CHANNEL f27 =====
P27 15.00 UPRG
P27M1 150.2678961 MHz
P27M2
===== CHANNEL f28 =====
P28 15.00 UPRG
P28M1 150.2678961 MHz
P28M2
===== CHANNEL f29 =====
P29 15.00 UPRG
P29M1 150.2678961 MHz
P29M2
===== CHANNEL f30 =====
P30 15.00 UPRG
P30M1 150.2678961 MHz
P30M2
===== CHANNEL f31 =====
P31 15.00 UPRG
P31M1 150.2678961 MHz
P31M2
===== CHANNEL f32 =====
P32 15.00 UPRG
P32M1 150.2678961 MHz
P32M2
===== CHANNEL f33 =====
P33 15.00 UPRG
P33M1 150.2678961 MHz
P33M2
===== CHANNEL f34 =====
P34 15.00 UPRG
P34M1 150.2678961 MHz
P34M2
===== CHANNEL f35 =====
P35 15.00 UPRG
P35M1 150.2678961 MHz
P35M2
===== CHANNEL f36 =====
P36 15.00 UPRG
P36M1 150.2678961 MHz
P36M2
===== CHANNEL f37 =====
P37 15.00 UPRG
P37M1 150.2678961 MHz
P37M2
===== CHANNEL f38 =====
P38 15.00 UPRG
P38M1 150.2678961 MHz
P38M2
===== CHANNEL f39 =====
P39 15.00 UPRG
P39M1 150.2678961 MHz
P39M2
===== CHANNEL f40 =====
P40 15.00 UPRG
P40M1 150.2678961 MHz
P40M2
===== CHANNEL f41 =====
P41 15.00 UPRG
P41M1 150.2678961 MHz
P41M2
===== CHANNEL f42 =====
P42 15.00 UPRG
P42M1 150.2678961 MHz
P42M2
===== CHANNEL f43 =====
P43 15.00 UPRG
P43M1 150.2678961 MHz
P43M2
===== CHANNEL f44 =====
P44 15.00 UPRG
P44M1 150.2678961 MHz
P44M2
===== CHANNEL f45 =====
P45 15.00 UPRG
P45M1 150.2678961 MHz
P45M2
===== CHANNEL f46 =====
P46 15.00 UPRG
P46M1 150.2678961 MHz
P46M2
===== CHANNEL f47 =====
P47 15.00 UPRG
P47M1 150.2678961 MHz
P47M2
===== CHANNEL f48 =====
P48 15.00 UPRG
P48M1 150.2678961 MHz
P48M2
===== CHANNEL f49 =====
P49 15.00 UPRG
P49M1 150.2678961 MHz
P49M2
===== CHANNEL f50 =====
P50 15.00 UPRG
P50M1 150.2678961 MHz
P50M2
===== CHANNEL f51 =====
P51 15.00 UPRG
P51M1 150.2678961 MHz
P51M2
===== CHANNEL f52 =====
P52 15.00 UPRG
P52M1 150.2678961 MHz
P52M2
===== CHANNEL f53 =====
P53 15.00 UPRG
P53M1 150.2678961 MHz
P53M2
===== CHANNEL f54 =====
P54 15.00 UPRG
P54M1 150.2678961 MHz
P54M2
===== CHANNEL f55 =====
P55 15.00 UPRG
P55M1 150.2678961 MHz
P55M2
===== CHANNEL f56 =====
P56 15.00 UPRG
P56M1 150.2678961 MHz
P56M2
===== CHANNEL f57 =====
P57 15.00 UPRG
P57M1 150.2678961 MHz
P57M2
===== CHANNEL f58 =====
P58 15.00 UPRG
P58M1 150.2678961 MHz
P58M2
===== CHANNEL f59 =====
P59 15.00 UPRG
P59M1 150.2678961 MHz
P59M2
===== CHANNEL f60 =====
P60 15.00 UPRG
P60M1 150.2678961 MHz
P60M2
===== CHANNEL f61 =====
P61 15.00 UPRG
P61M1 150.2678961 MHz
P61M2
===== CHANNEL f62 =====
P62 15.00 UPRG
P62M1 150.2678961 MHz
P62M2
===== CHANNEL f63 =====
P63 15.00 UPRG
P63M1 150.2678961 MHz
P63M2
===== CHANNEL f64 =====
P64 15.00 UPRG
P64M1 150.2678961 MHz
P64M2
===== CHANNEL f65 =====
P65 15.00 UPRG
P65M1 150.2678961 MHz
P65M2
===== CHANNEL f66 =====
P66 15.00 UPRG
P66M1 150.2678961 MHz
P66M2
===== CHANNEL f67 =====
P67 15.00 UPRG
P67M1 150.2678961 MHz
P67M2
===== CHANNEL f68 =====
P68 15.00 UPRG
P68M1 150.2678961 MHz
P68M2
===== CHANNEL f69 =====
P69 15.00 UPRG
P69M1 150.2678961 MHz
P69M2
===== CHANNEL f70 =====
P70 15.00 UPRG
P70M1 150.2678961 MHz
P70M2
===== CHANNEL f71 =====
P71 15.00 UPRG
P71M1 150.2678961 MHz
P71M2
===== CHANNEL f72 =====
P72 15.00 UPRG
P72M1 150.2678961 MHz
P72M2
===== CHANNEL f73 =====
P73 15.00 UPRG
P73M1 150.2678961 MHz
P73M2
===== CHANNEL f74 =====
P74 15.00 UPRG
P74M1 150.2678961 MHz
P74M2
===== CHANNEL f75 =====
P75 15.00 UPRG
P75M1 150.2678961 MHz
P75M2
===== CHANNEL f76 =====
P76 15.00 UPRG
P76M1 150.2678961 MHz
P76M2
===== CHANNEL f77 =====
P77 15.00 UPRG
P77M1 150.2678961 MHz
P77M2
===== CHANNEL f78 =====
P78 15.00 UPRG
P78M1 150.2678961 MHz
P78M2
===== CHANNEL f79 =====
P79 15.00 UPRG
P79M1 150.26
```
